# Supplementary material
Source: PubMed Central journal article supplement (PMC3932497)

**SUPPORTING INFORMATION**

**DOI:** 10.1002/ejoc.201200691

**Title:** Lyngbyabellins K–N from Two Palmyra Atoll Collections of the Marine Cyanobacterium *Moorea bouillonii*

**Author(s):** Hyukjae Choi, Emily Mevers, Tara Byrum, Frederick A. Valeriote, William H. Gerwick\*

Table S1. NMR Spectroscopic Data for lyngbyabellin L (**2**), 7-*epi*-lyngbyabellin L (**3**), and lyngbyabellin M (**4**) in CDCl<sub>3</sub> at 500 MHz (<sup>1</sup>H) and 125MHz (<sup>13</sup>C).

| No.   | <b>2</b>            |                                             |            |                   | <b>3</b>            |                                             |               |                   | <b>4</b>            |                                             |                 |                   |
|-------|---------------------|---------------------------------------------|------------|-------------------|---------------------|---------------------------------------------|---------------|-------------------|---------------------|---------------------------------------------|-----------------|-------------------|
|       | $\delta_c$<br>[ppm] | $\delta_H$ [ppm]<br>multi ( <i>J</i> in Hz) | COSY       | HMBC              | $\delta_c$<br>[ppm] | $\delta_H$ [ppm]<br>multi ( <i>J</i> in Hz) | COSY          | HMBC              | $\delta_c$<br>[ppm] | $\delta_H$ [ppm]<br>multi ( <i>J</i> in Hz) | COSY            | HMBC              |
| 1     | 174.6               |                                             |            |                   | 174.6               |                                             |               |                   | 174.4               |                                             |                 |                   |
| 2     | 42.7                | 3.31 dq (11.0, 7.3)                         | 3, 9       | 1, 3, 9           | 42.6                | 3.31 dq (11.0, 7.3)                         | 3, 9          | 1, 3, 9           | 44.4                | 2.84 dt (10.8, 6.2)                         | 3, 9            | 1, 3, 9           |
| 3     | 75.6                | 5.33 ddd (11.0, 8.4, 3.0)                   | 2, 4a, 4b  | 1, 2, 5, 10       | 75.4                | 5.34 ddd (11.0, 8.2, 3.6)                   | 2, 4a, 4b     | 1, 2, 5, 10       | 75.4                | 3.80 m                                      | 2, 3-OH, 4      | 1, 4, 5           |
| 3-OH  |                     |                                             |            |                   |                     |                                             |               |                   |                     | 5.51 brs                                    | 3               |                   |
| 4a    | 29.9                | 1.91 m                                      | 3, 4b, 5b  |                   | 30.3                | 1.95 ddd (14.6, 8.2, 3.6)                   | 3, 4b, 5a, 5b |                   | 34.4                | 1.93 m                                      | 3, 4, 5         | 2, 3, 5, 6        |
| 4b    |                     | 1.72 m                                      | 3, 4a, 5a  | 3, 5, 6           |                     | 1.67 m                                      | 3, 4a, 5a, 5b | 3, 5, 6           |                     |                                             |                 |                   |
| 5a    | 20.5                | 1.61 m                                      | 6b         | 3, 6, 7           | 21.0                | 1.63 m                                      | 4a, 6a        | 4, 6, 7           | 21.5                | 1.86 m                                      | 4, 6            | 4, 6, 7           |
| 5b    |                     | 1.55 m                                      | 4a, 6a     | 6                 |                     | 1.52 m                                      | 4b, 6b, 7     | 3, 4, 6           |                     |                                             |                 |                   |
| 6a    | 40.1                | 1.77 m                                      | 5b, 6b, 7  | 4, 5, 7           | 40.3                | 1.77 ddd (15.3, 8.3, 4.1)                   | 5a, 7         | 4, 5, 7           | 50.0                | 2.24 m                                      | 5, 6, 7         | 5, 7, 8           |
| 6b    |                     | 1.66 m                                      | 5a, 6a, 7  | 5, 8              |                     | 1.66 m                                      | 5b, 7         | 5, 8              |                     |                                             |                 |                   |
| 7     | 58.2                | 4.02 ddq (8.1, 4.0, 6.3)                    | 6a, 8      | 5                 | 58.5                | 3.98 ddq (8.4, 4.1, 6.5)                    | 6b, 8         |                   | 90.8                |                                             |                 |                   |
| 8     | 25.5                | 1.49 d (6.3)                                | 7          | 6, 7              | 25.4                | 1.49 d (6.5)                                | 7             | 5, 6              | 37.7                | 2.16 s                                      |                 | 6, 7              |
| 9     | 15.3                | 1.30 d (7.3)                                | 2          | 1, 2, 3           | 15.1                | 1.30 d (7.3)                                | 2             | 1, 2, 3           | 15.0                | 1.26 d (7.2)                                | 2               | 1, 2, 3           |
| 10    | 160.0               |                                             |            |                   | 160.4               |                                             |               |                   | 161.8               |                                             |                 |                   |
| 11    | 145.7               |                                             |            |                   | 145.9               |                                             |               |                   | 147.6               |                                             |                 |                   |
| 12    | 128.3               | 8.15 s                                      |            | 10, 11, 13        | 128.2               | 8.14 s                                      |               | 10, 11, 13        | 128.2               | 8.16 s                                      |                 | 10, 11, 13        |
| 13    | 169.7               |                                             |            |                   | 169.2               |                                             |               |                   | 171.2               |                                             |                 |                   |
| 14    | 70.1                | 5.35 m                                      | 15a, 15b   | 13                | 70.0                | 5.33 m                                      | 15a, 15b      | 13                | 70.30               | 5.41 brd (8.3)                              | 14-OH, 15a, 15b | 13, 15            |
| 14-OH |                     | 6.25 brs                                    |            |                   |                     | 6.24 brs                                    |               |                   |                     | 6.68 brs                                    | 14              |                   |
| 15a   | 69.9                | 4.76 dd (11.4, 2.2)                         | 14         | 14, 16            | 69.4                | 4.76 dd (11.5, 1.8)                         | 14            | 14, 16            | 70.26               | 4.95 dd (11.2, 2.3)                         | 14, 15b         | 13, 16            |
| 15b   |                     | 4.58 dd (11.4, 2.9)                         | 14         | 13, 14            |                     | 4.57 dd (11.5, 2.6)                         | 14            | 13, 14            |                     | 4.30 dd (11.2, 9.1)                         | 14, 15a         | 13, 14, 16        |
| 16    | 160.8               |                                             |            |                   | 160.7               |                                             |               |                   | 161.7               |                                             |                 |                   |
| 17    | 146.1               |                                             |            |                   | 145.5               |                                             |               |                   | 145.9               |                                             |                 |                   |
| 18    | 128.9               | 8.16 s                                      |            | 16, 17, 19        | 128.9               | 8.16 s                                      |               | 16, 17, 19        | 129.2               | 8.30 s                                      |                 | 16, 17, 19        |
| 19    | 169.9               |                                             |            |                   | 169.7               |                                             |               |                   | 170.5               |                                             |                 |                   |
| 20    | 77.6                | 5.51 d (5.5)                                | 21         | 1, 19, 21, 22, 23 | 77.4                | 5.51 d (5.7)                                | 21            | 1, 19, 21, 22, 23 | 77.5                | 5.99 d (3.6)                                | 21              | 1, 19, 21, 22, 23 |
| 21    | 34.3                | 2.30 m                                      | 20, 22, 23 | 19, 20, 22, 23    | 34.8                | 2.32 td (13.4, 6.7)                         | 20, 22, 23    | 19, 20, 22, 23    | 34.4                | 2.33 m                                      | 20, 22, 23      |                   |
| 22    | 19.2                | 1.04 d (6.8)                                | 21         | 20, 21, 23        | 19.0                | 1.03 d (6.8)                                | 21            | 20, 21, 23        | 19.5                | 1.13 d (6.9)                                | 21              | 20, 21, 23        |
| 23    | 17.4                | 1.06 d (6.7)                                | 21         | 20, 21, 22        | 17.3                | 1.07 d (6.7)                                | 21            | 20, 21, 22        | 16.8                | 0.98 d (6.9)                                | 21              | 20, 21, 22        |
| 24    |                     |                                             |            |                   |                     |                                             |               |                   | 61.8                | 4.42 q (7.1)                                | 25              | 10, 25            |
| 25    |                     |                                             |            |                   |                     |                                             |               |                   | 14.7                | 1.41 t (7.1)                                | 24              | 24                |

Figure S1. HR ESITOFMS of lyngbyabellin K (1).

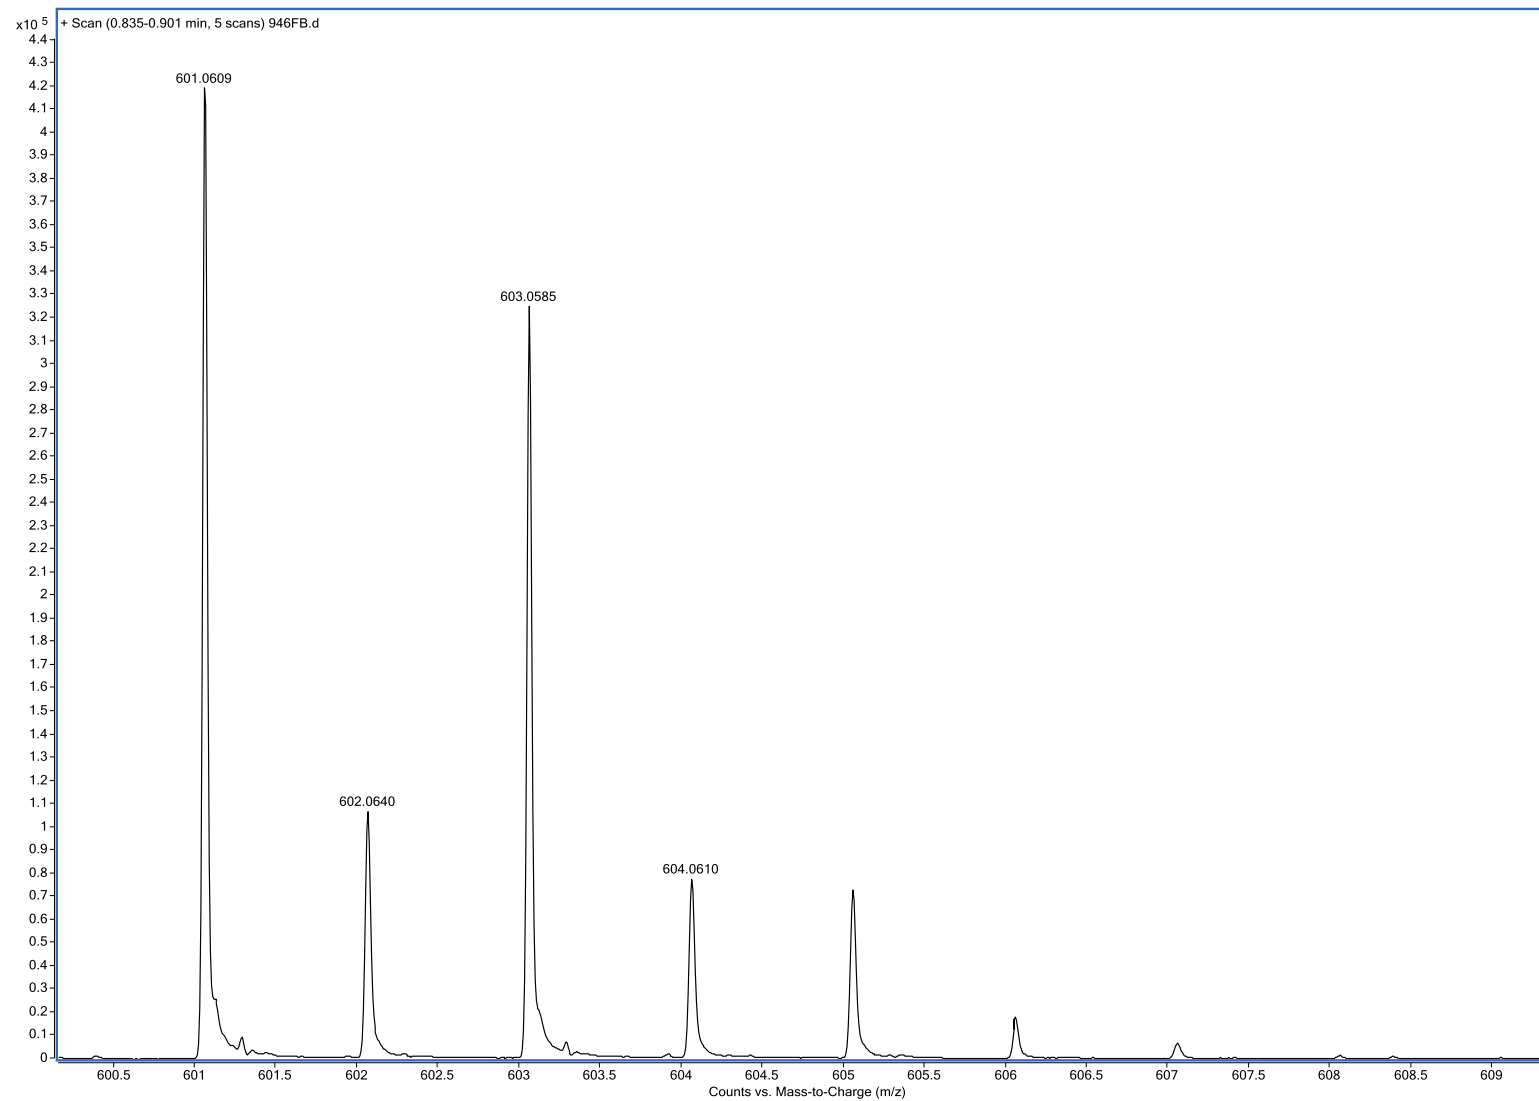

Figure S2.  $^1\text{H}$  NMR spectrum of lyngbyabellin K (**1**) (recorded in  $\text{CDCl}_3$  at 500 MHz).

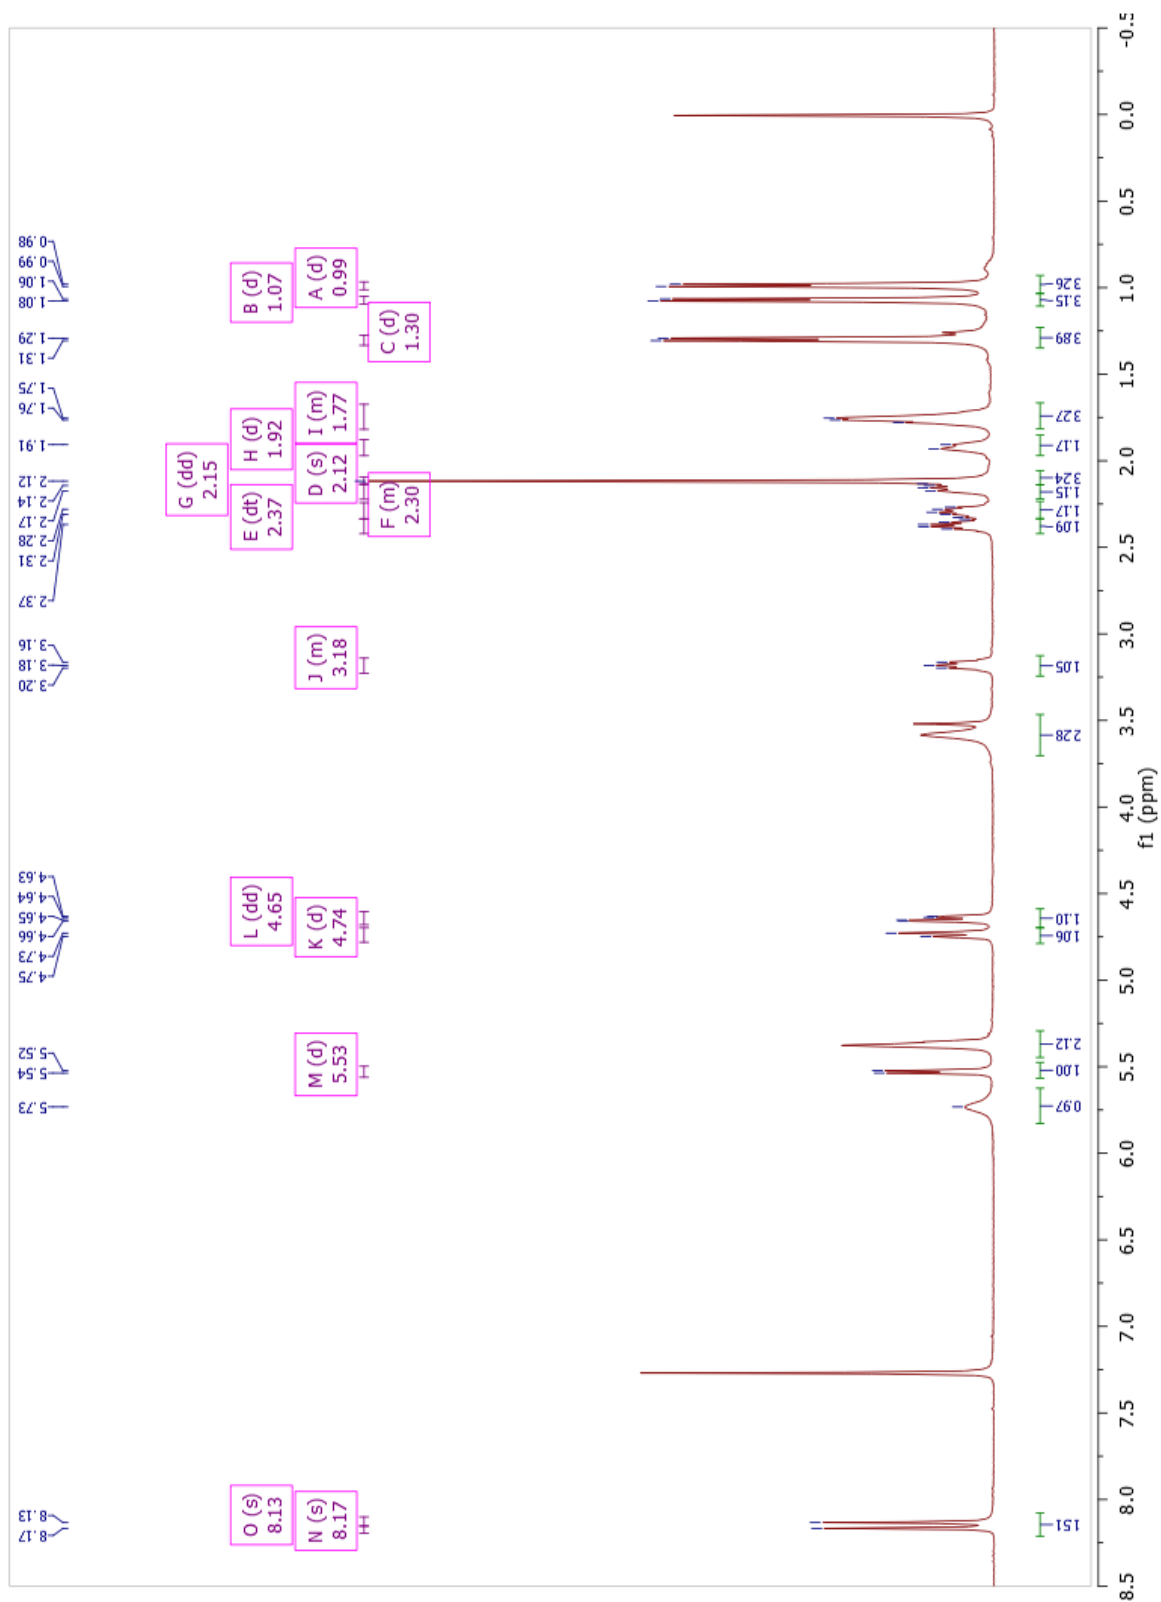

Figure S3.  $^{13}\text{C}$  NMR spectrum of lyngbyabellin K (**1**) (recorded in  $\text{CDCl}_3$  at 125 MHz).

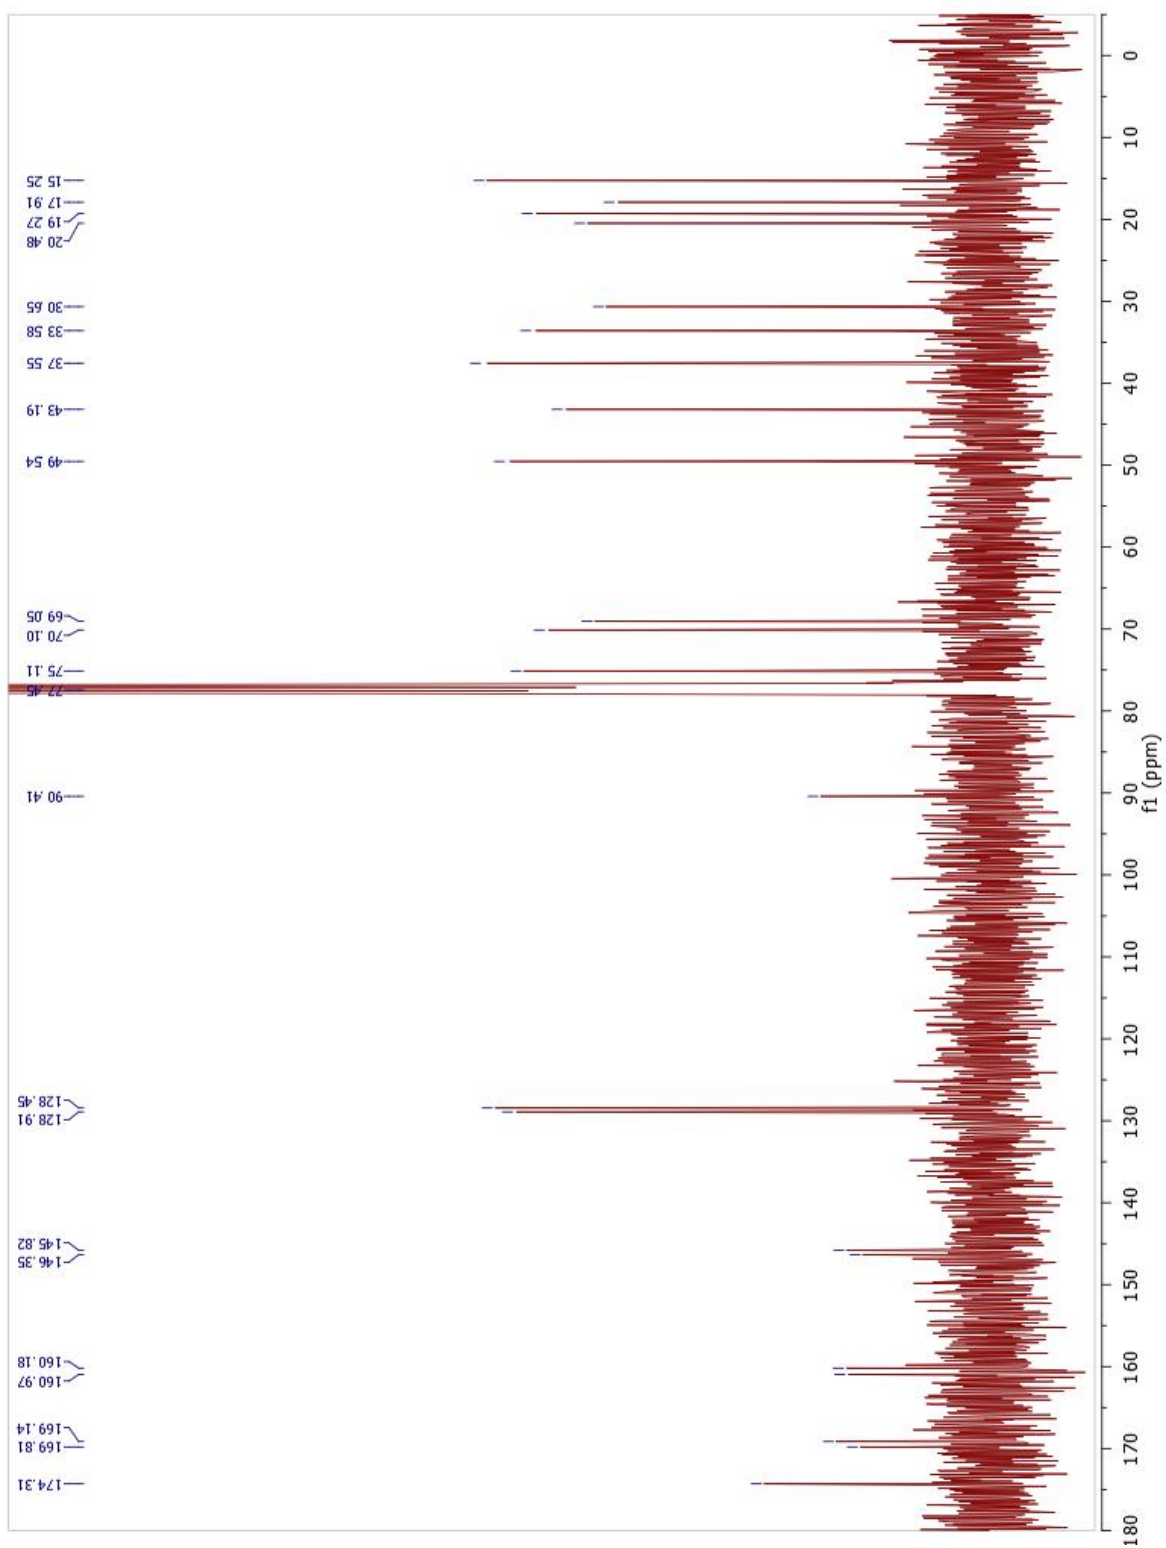

Figure S4. gHSQC spectrum of lyngbyabellin K (**1**) (recorded in CDCl<sub>3</sub> at 500 MHz).

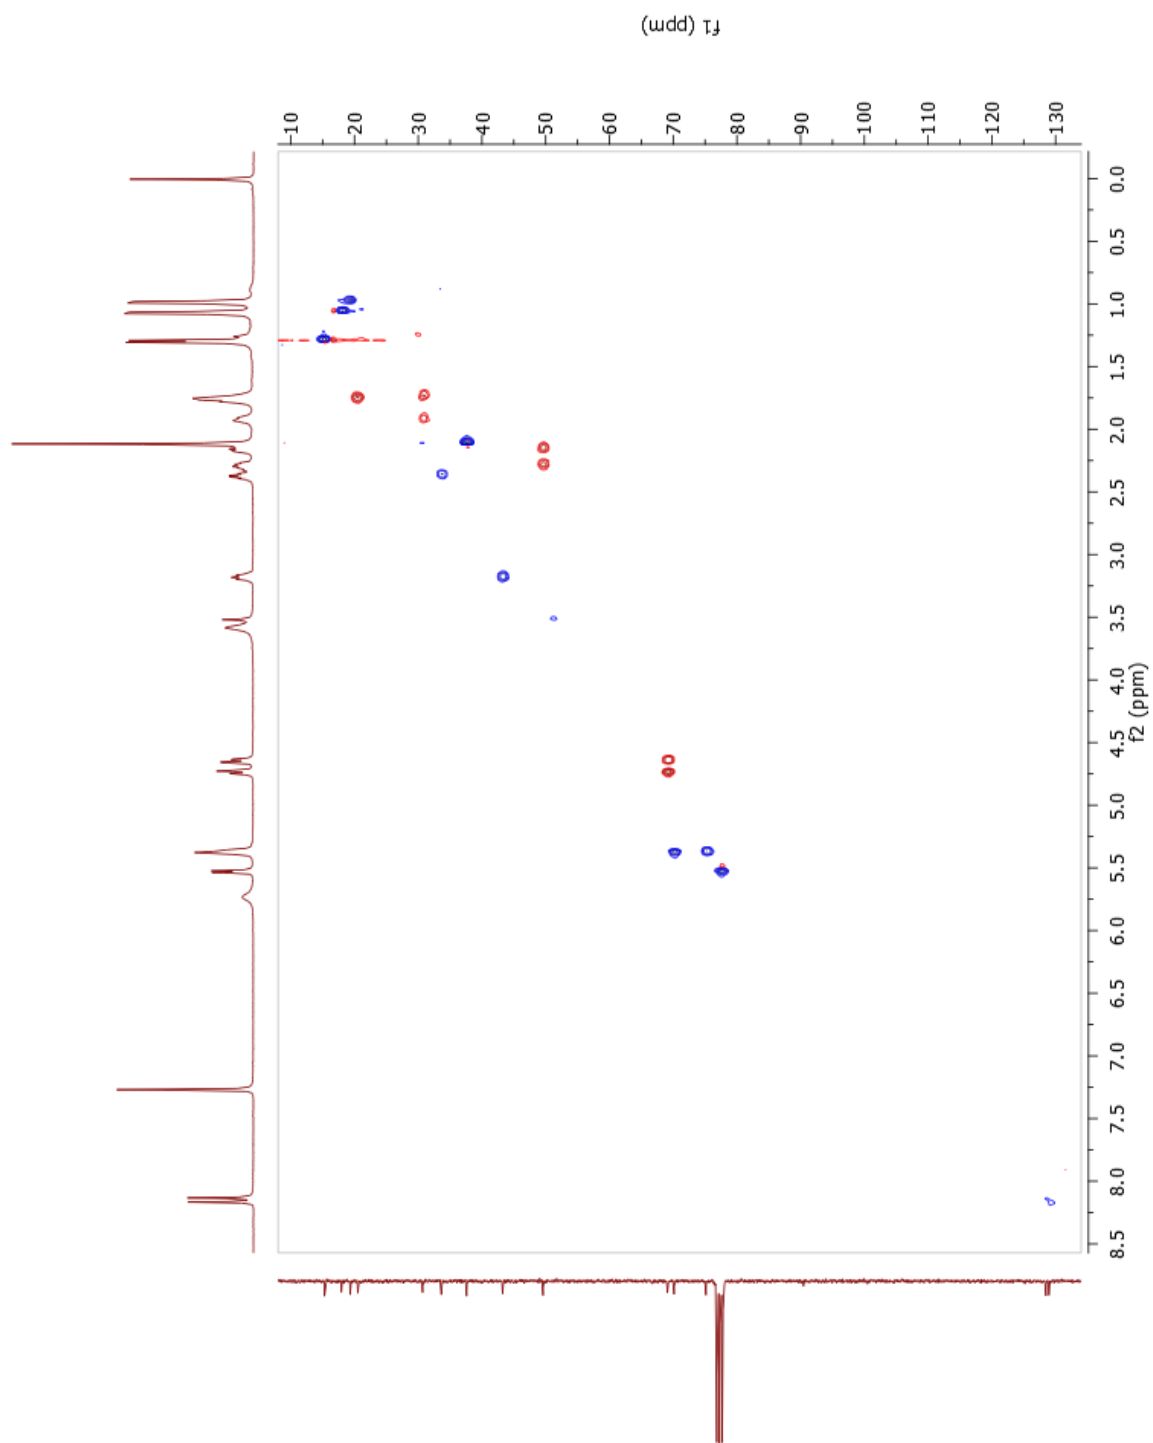

Figure S5. gCOSY spectrum of lyngbyabellin K (**1**) (recorded in CDCl<sub>3</sub> at 500 MHz).

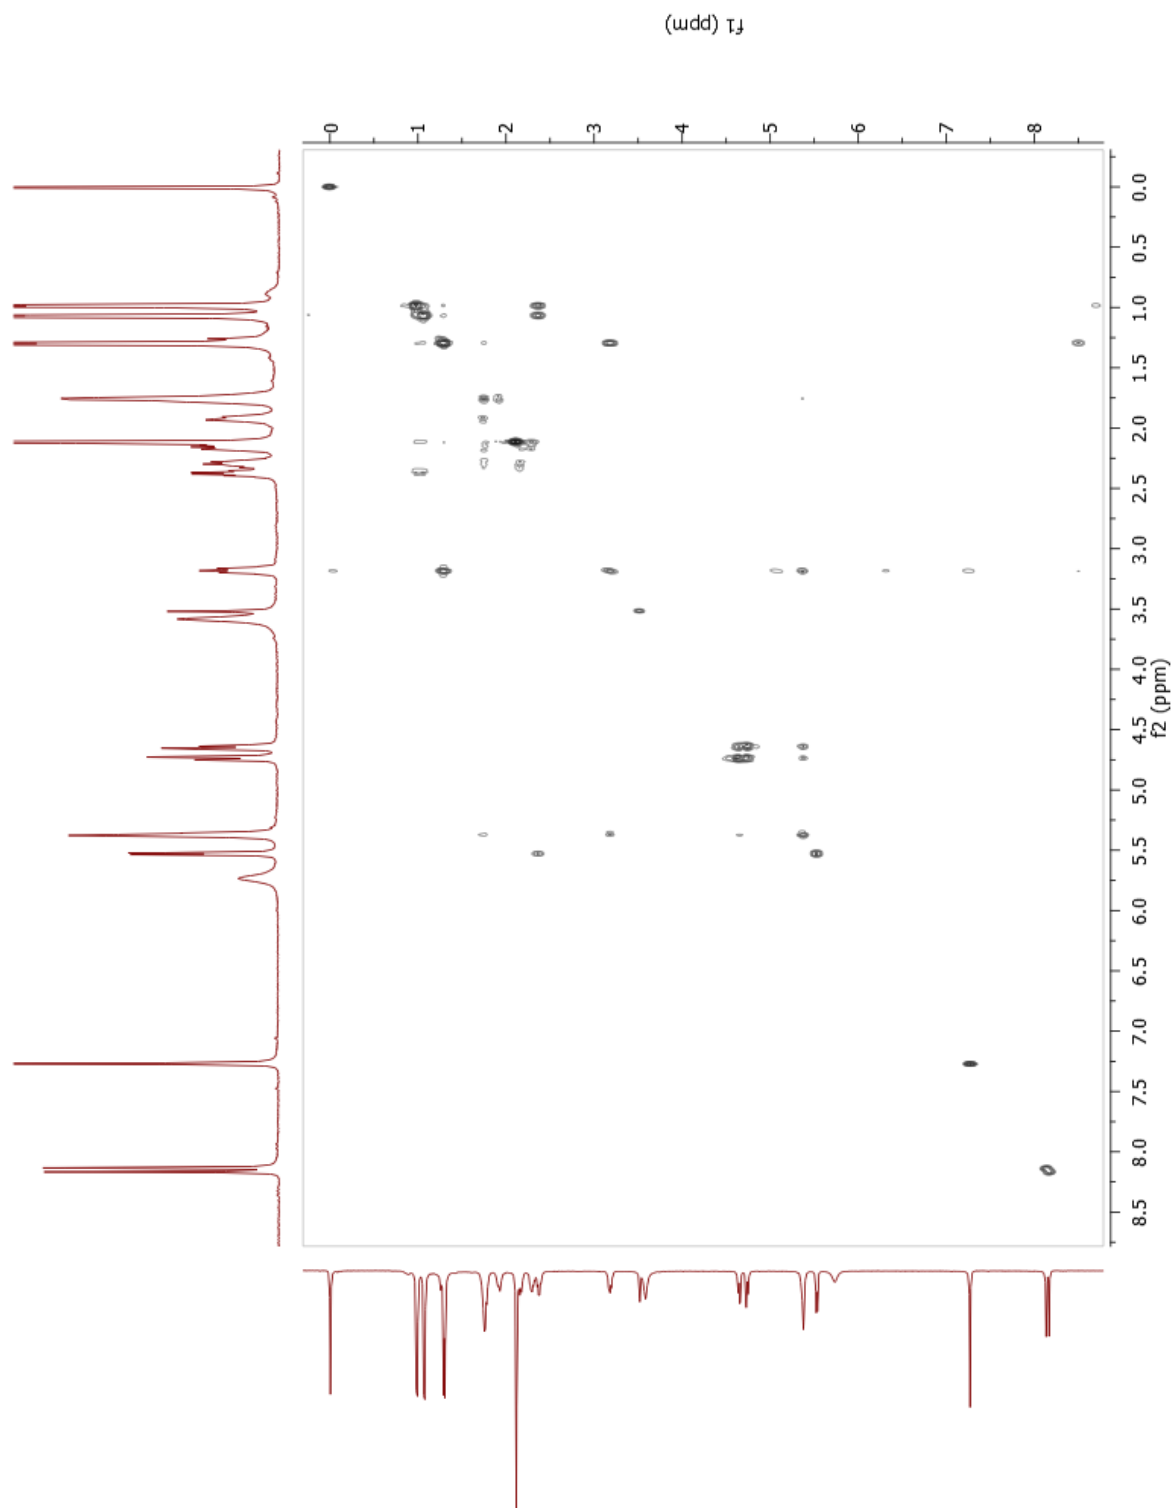

Figure S6. gHMBC spectrum of lyngbyabellin K (**1**) (recorded in CDCl<sub>3</sub> at 500 MHz).

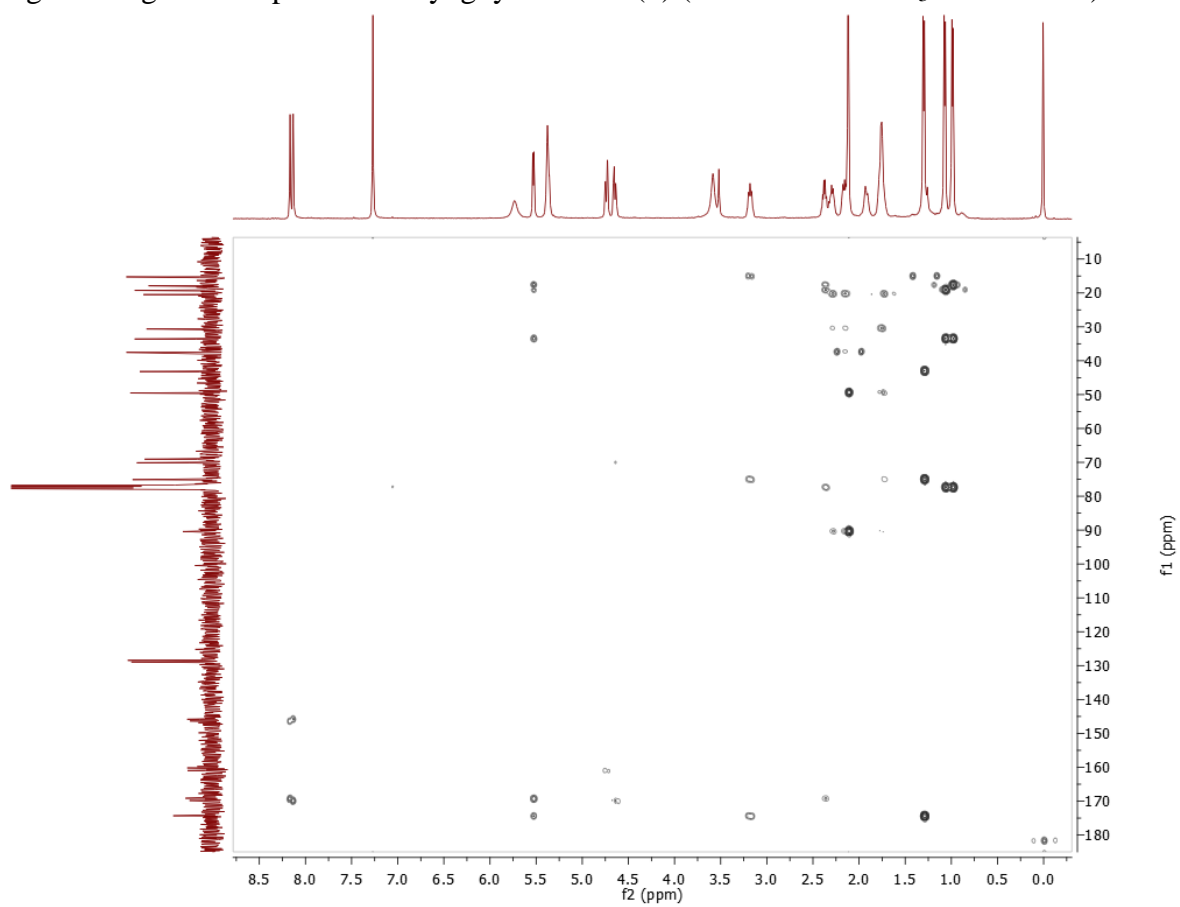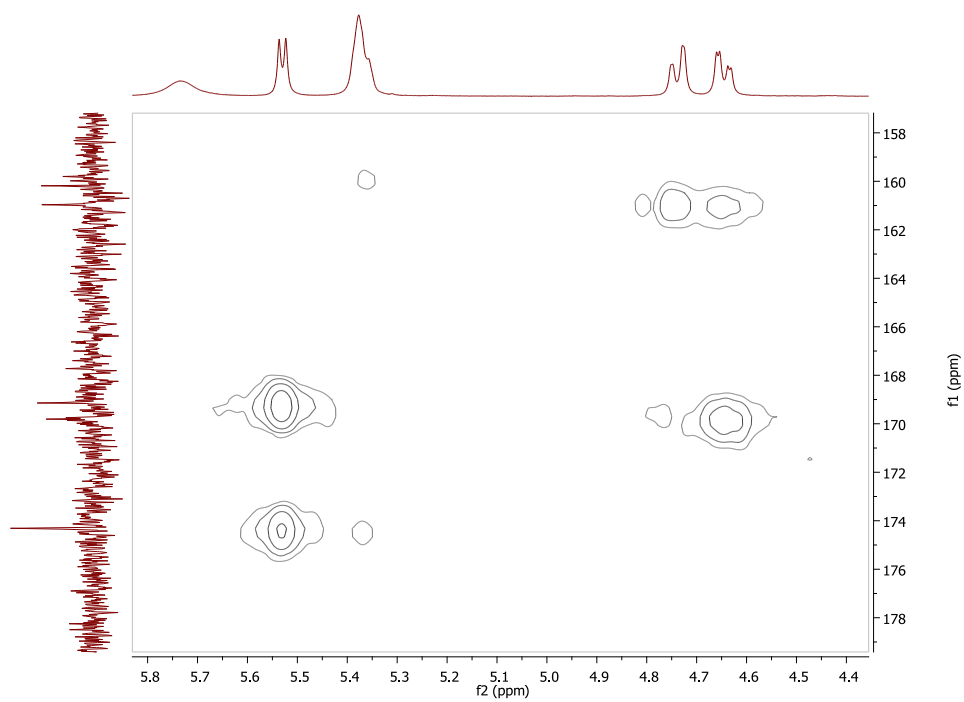



Figure S7. ORTEP representation of lyngbyabellin K (**1**).

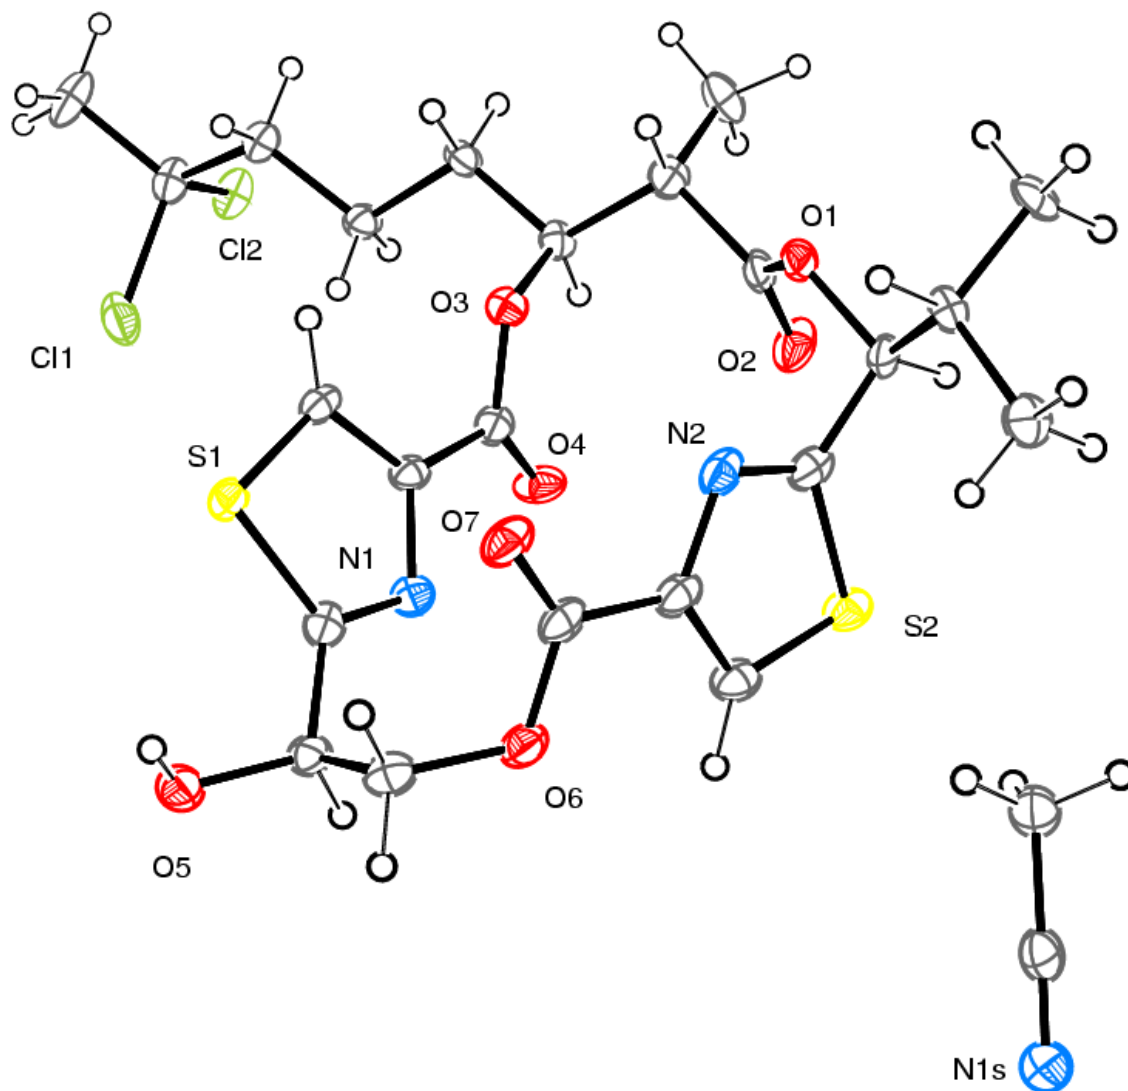

Table S2. Crystal data and structure refinement for lyngbyabellin K (1).

|                                   |                                                                                              |                            |
|-----------------------------------|----------------------------------------------------------------------------------------------|----------------------------|
| Empirical formula                 | C <sub>25</sub> H <sub>31</sub> Cl <sub>2</sub> N <sub>3</sub> O <sub>7</sub> S <sub>2</sub> |                            |
| Formula weight                    | 620.55                                                                                       |                            |
| Temperature                       | 100(2) K                                                                                     |                            |
| Wavelength                        | 1.54178 Å                                                                                    |                            |
| Crystal system                    | Monoclinic                                                                                   |                            |
| Space group                       | P2(1)                                                                                        |                            |
| Unit cell dimensions              | a = 10.6419(8) Å                                                                             | $\alpha = 90^\circ$        |
|                                   | b = 5.8776(5) Å                                                                              | $\beta = 101.928(6)^\circ$ |
|                                   | c = 23.859(2) Å                                                                              | $\gamma = 90^\circ$        |
| Volume                            | 1460.1(2) Å <sup>3</sup>                                                                     |                            |
| Z                                 | 2                                                                                            |                            |
| Density (calculated)              | 1.411 Mg/m <sup>3</sup>                                                                      |                            |
| Absorption coefficient            | 3.744 mm <sup>-1</sup>                                                                       |                            |
| F(000)                            | 648                                                                                          |                            |
| Crystal size                      | 0.21 x 0.11 x 0.05 mm <sup>3</sup>                                                           |                            |
| Crystal color, habit              | Colorless Needle                                                                             |                            |
| Theta range for data collection   | 1.89 to 67.67°                                                                               |                            |
| Index ranges                      | -12<=h<=12, -6<=k<=6, -27<=l<=10                                                             |                            |
| Reflections collected             | 7218                                                                                         |                            |
| Independent reflections           | 4362 [R(int) = 0.0358]                                                                       |                            |
| Completeness to theta = 67.50°    | 90.7 %                                                                                       |                            |
| Absorption correction             | Semi-empirical from equivalents                                                              |                            |
| Max. and min. transmission        | 0.8349 and 0.5069                                                                            |                            |
| Refinement method                 | Full-matrix least-squares on F <sup>2</sup>                                                  |                            |
| Data / restraints / parameters    | 4362 / 1 / 388                                                                               |                            |
| Goodness-of-fit on F <sup>2</sup> | 1.026                                                                                        |                            |
| Final R indices [I>2sigma(I)]     | R1 = 0.0626, wR2 = 0.1586                                                                    |                            |
| R indices (all data)              | R1 = 0.0721, wR2 = 0.1655                                                                    |                            |
| Absolute structure parameter      | -0.02(2)                                                                                     |                            |
| Extinction coefficient            | not measured                                                                                 |                            |
| Largest diff. peak and hole       | 0.680 and -0.368 e.Å <sup>-3</sup>                                                           |                            |

Figure S8. HR ESITOFMS of lyngbyabellin L (2).

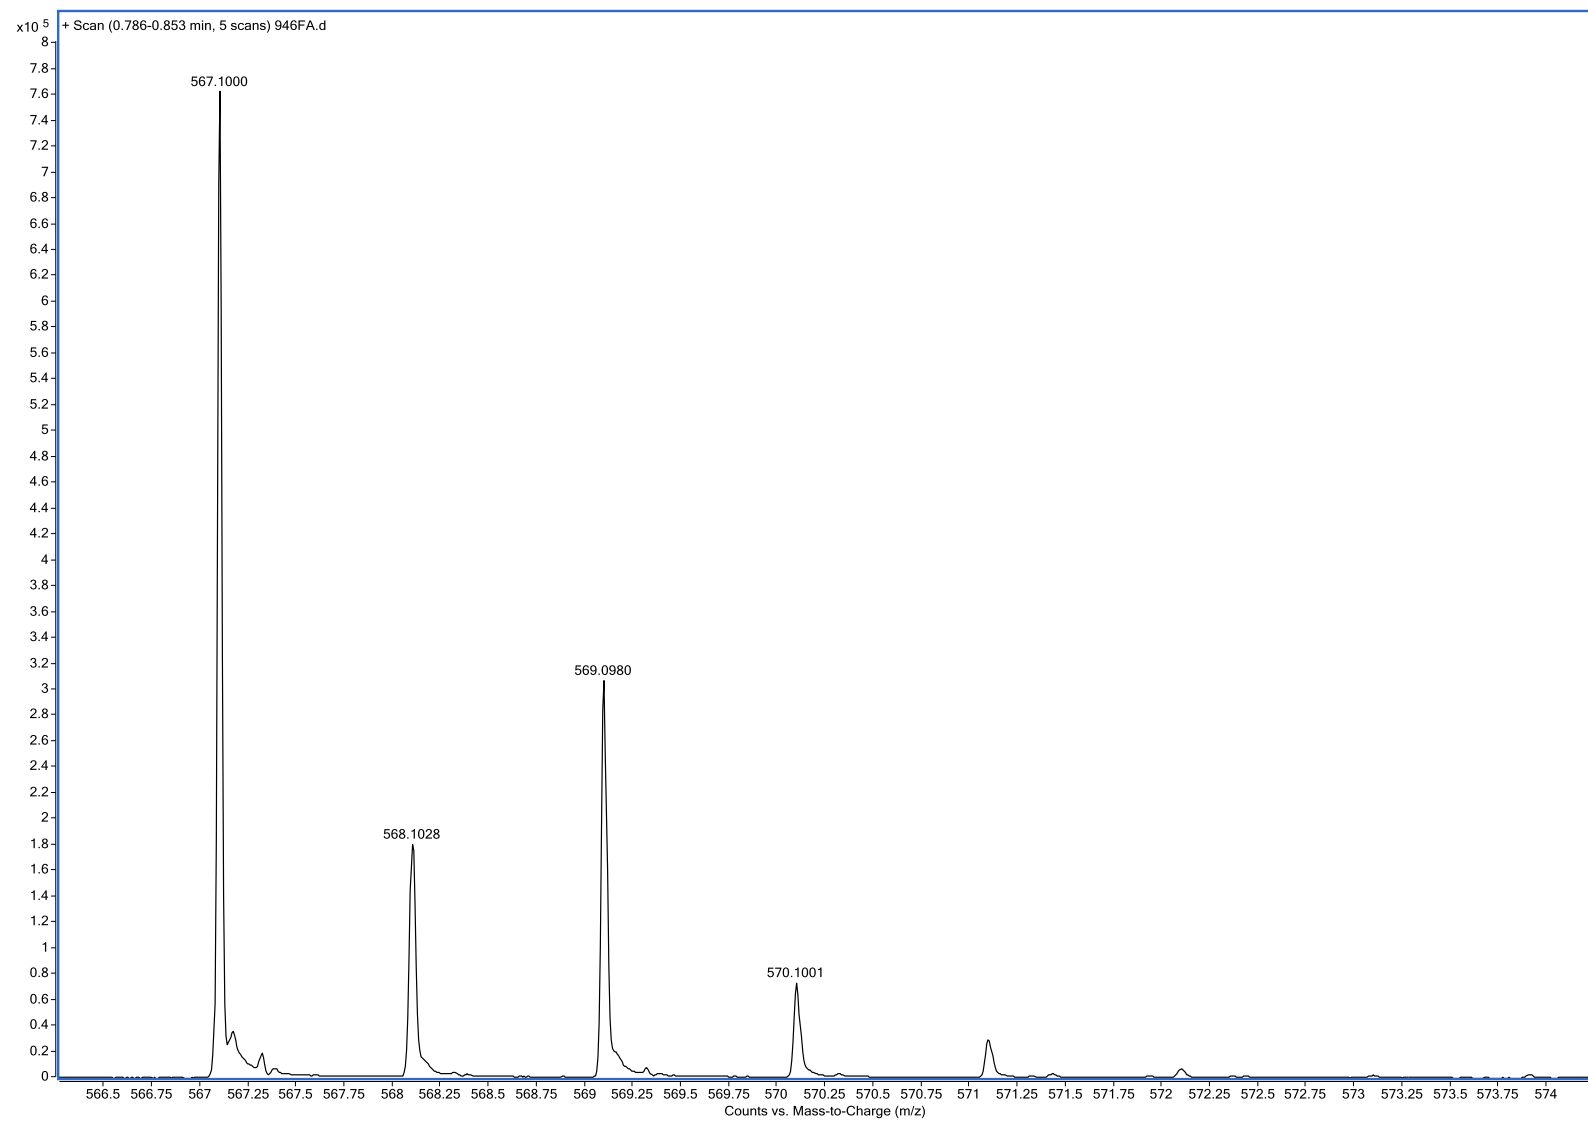

Figure S9.  $^1\text{H}$  NMR spectrum of lyngbyabellin L (**2**) (recorded in  $\text{CDCl}_3$  at 500 MHz).

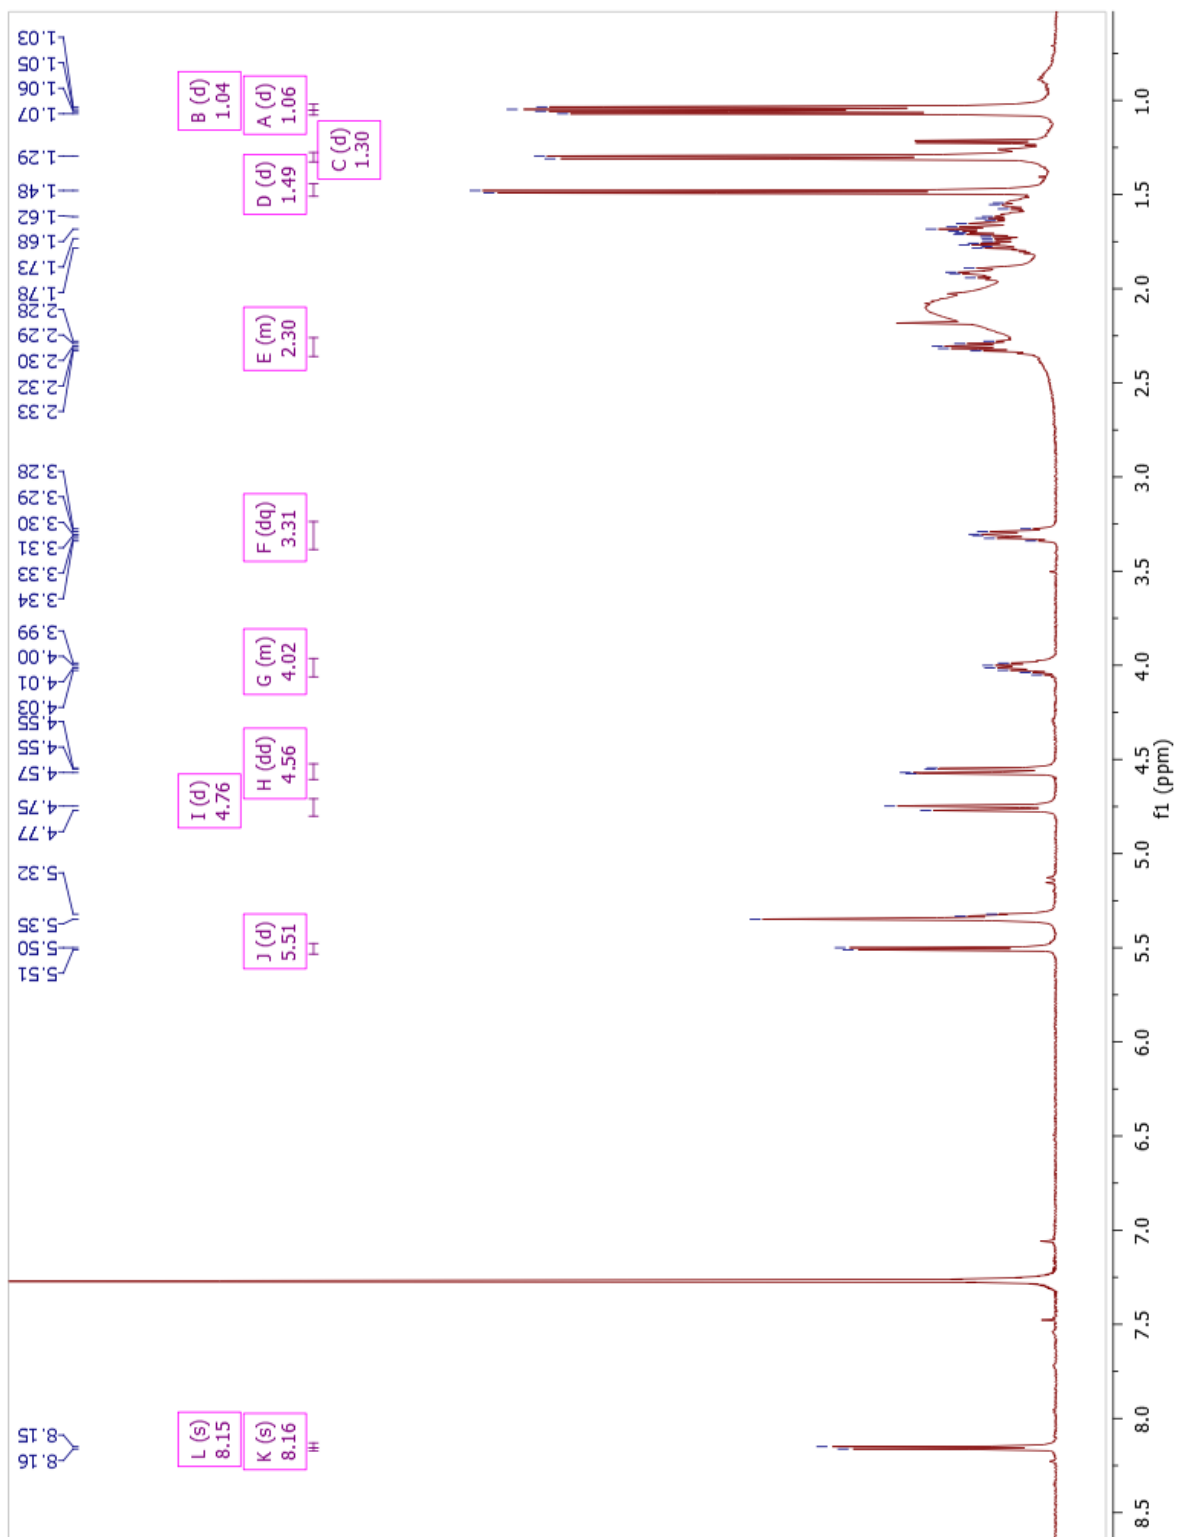

Figure S10.  $^{13}\text{C}$  NMR spectrum of lyngbyabellin L (**2**) (recorded in  $\text{CDCl}_3$  at 125 MHz).

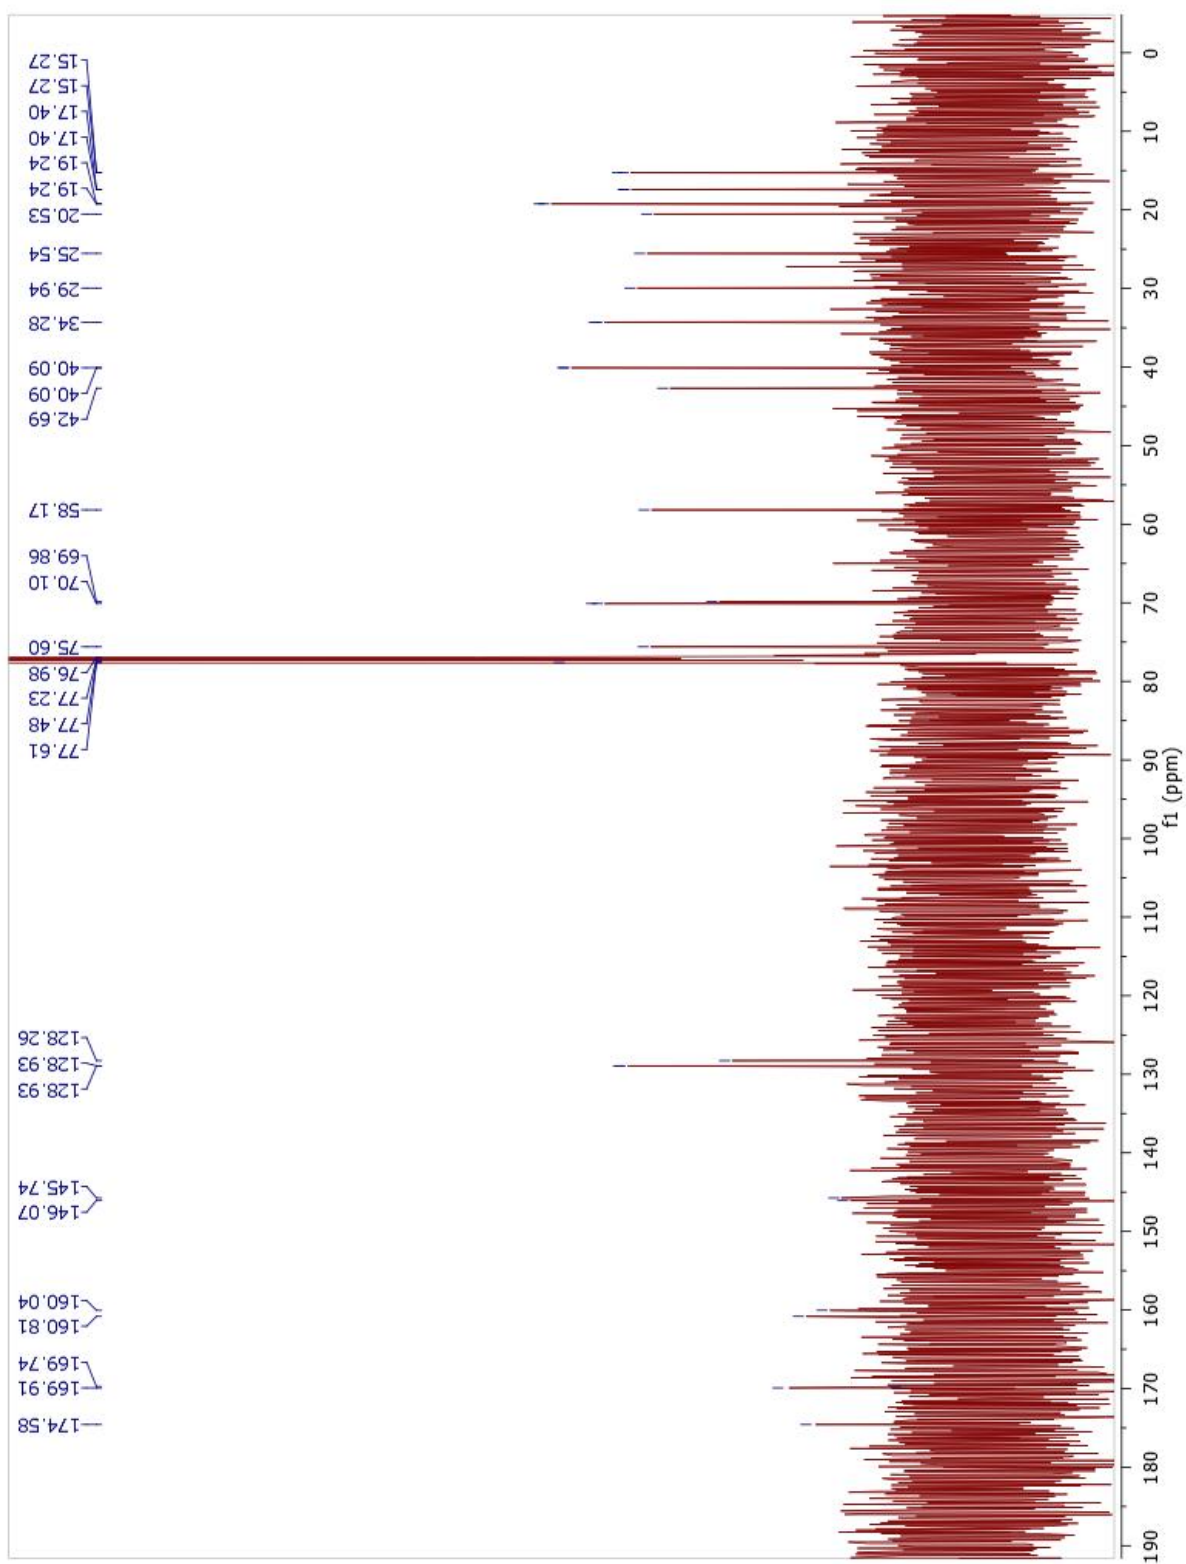

Figure S11. gHSQC spectrum of lyngbyabellin L (**2**) (recorded in CDCl<sub>3</sub> at 500 MHz).

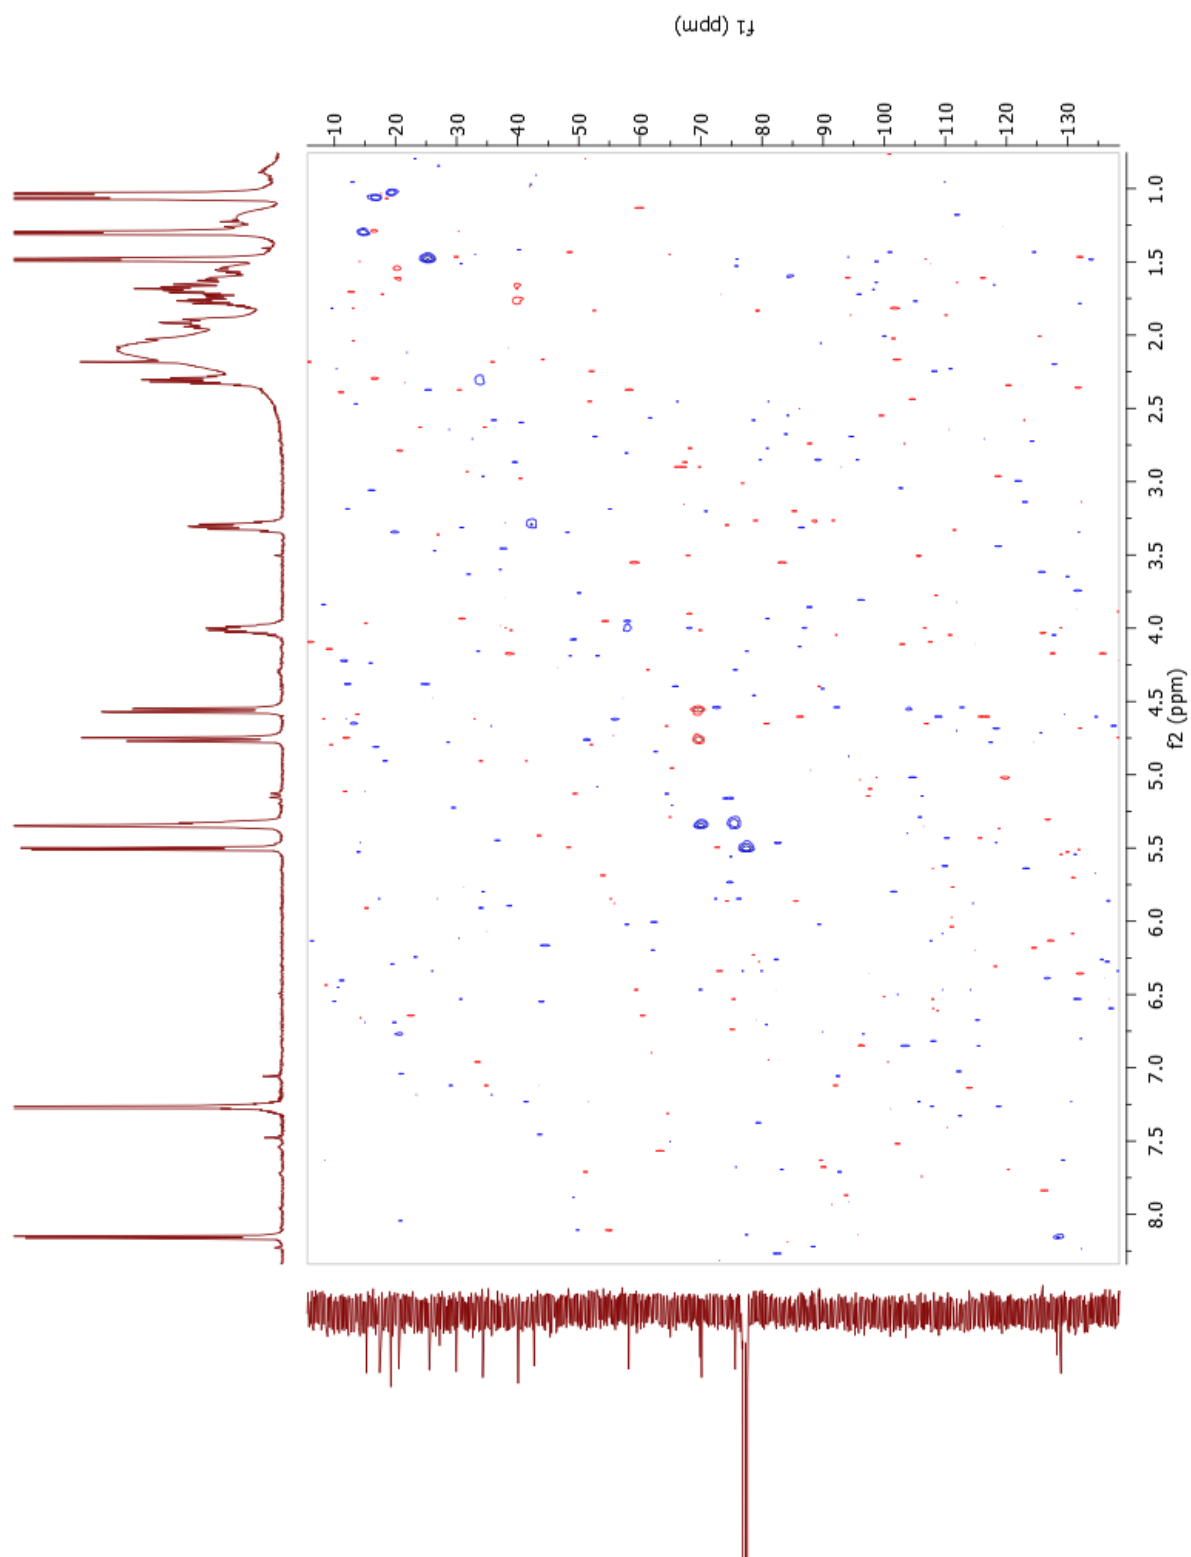

Figure S12. gCOSY spectrum of lyngbyabellin L (**2**) (recorded in CDCl<sub>3</sub> at 500 MHz).

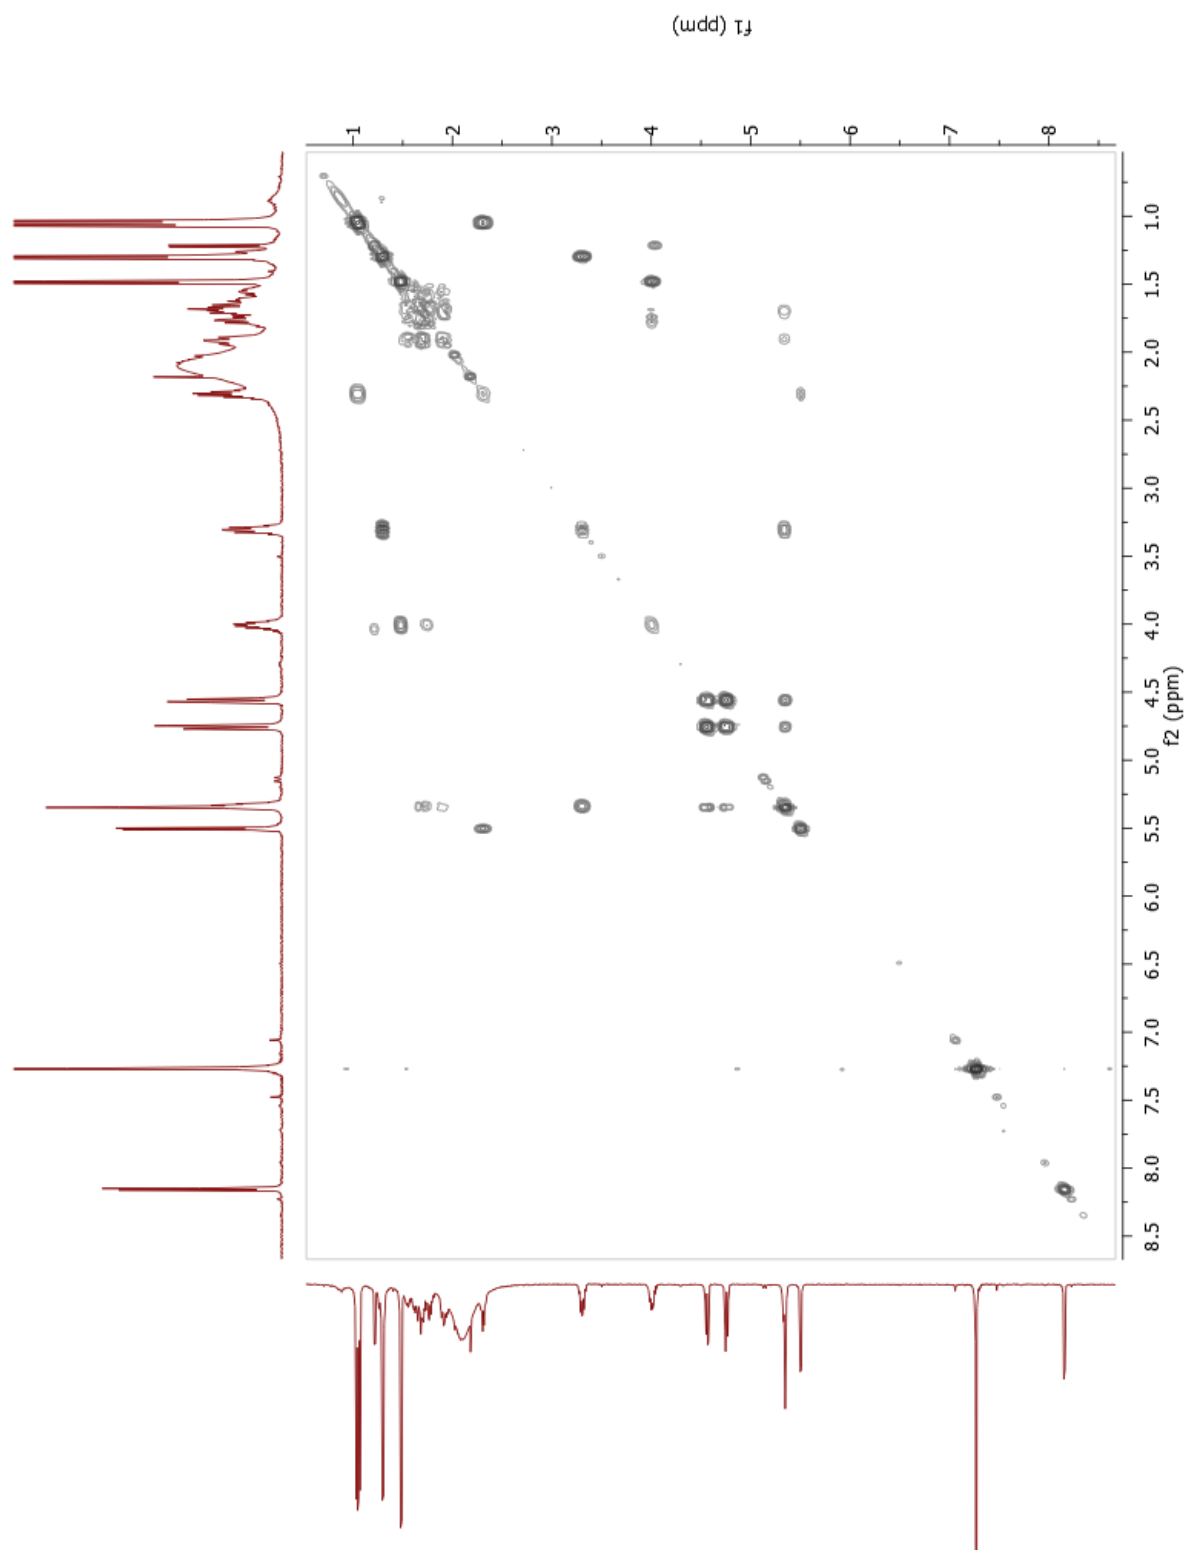

Figure S13. gHMBC spectrum of lyngbyabellin L (**2**) (recorded in CDCl<sub>3</sub> at 500 MHz)

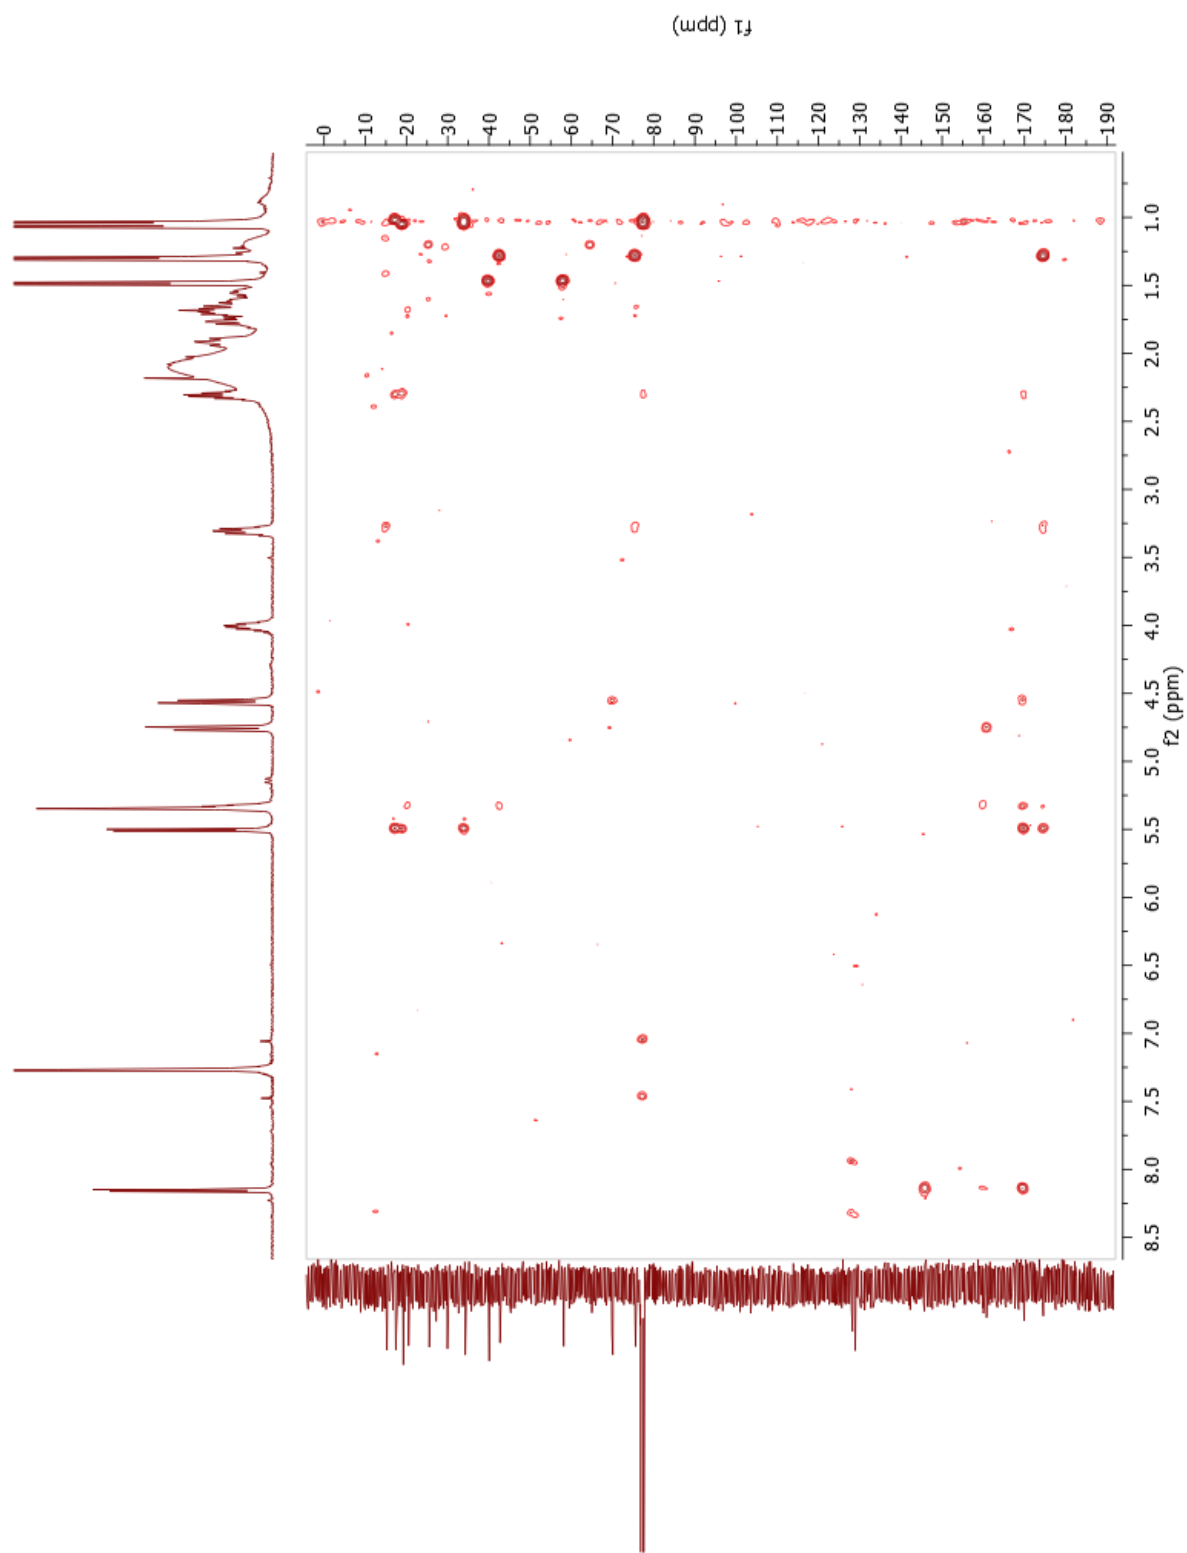



Figure S14. DQF-COSY spectrum of lyngbyabellin L (**2**) (recorded in CDCl<sub>3</sub> at 600 MHz)

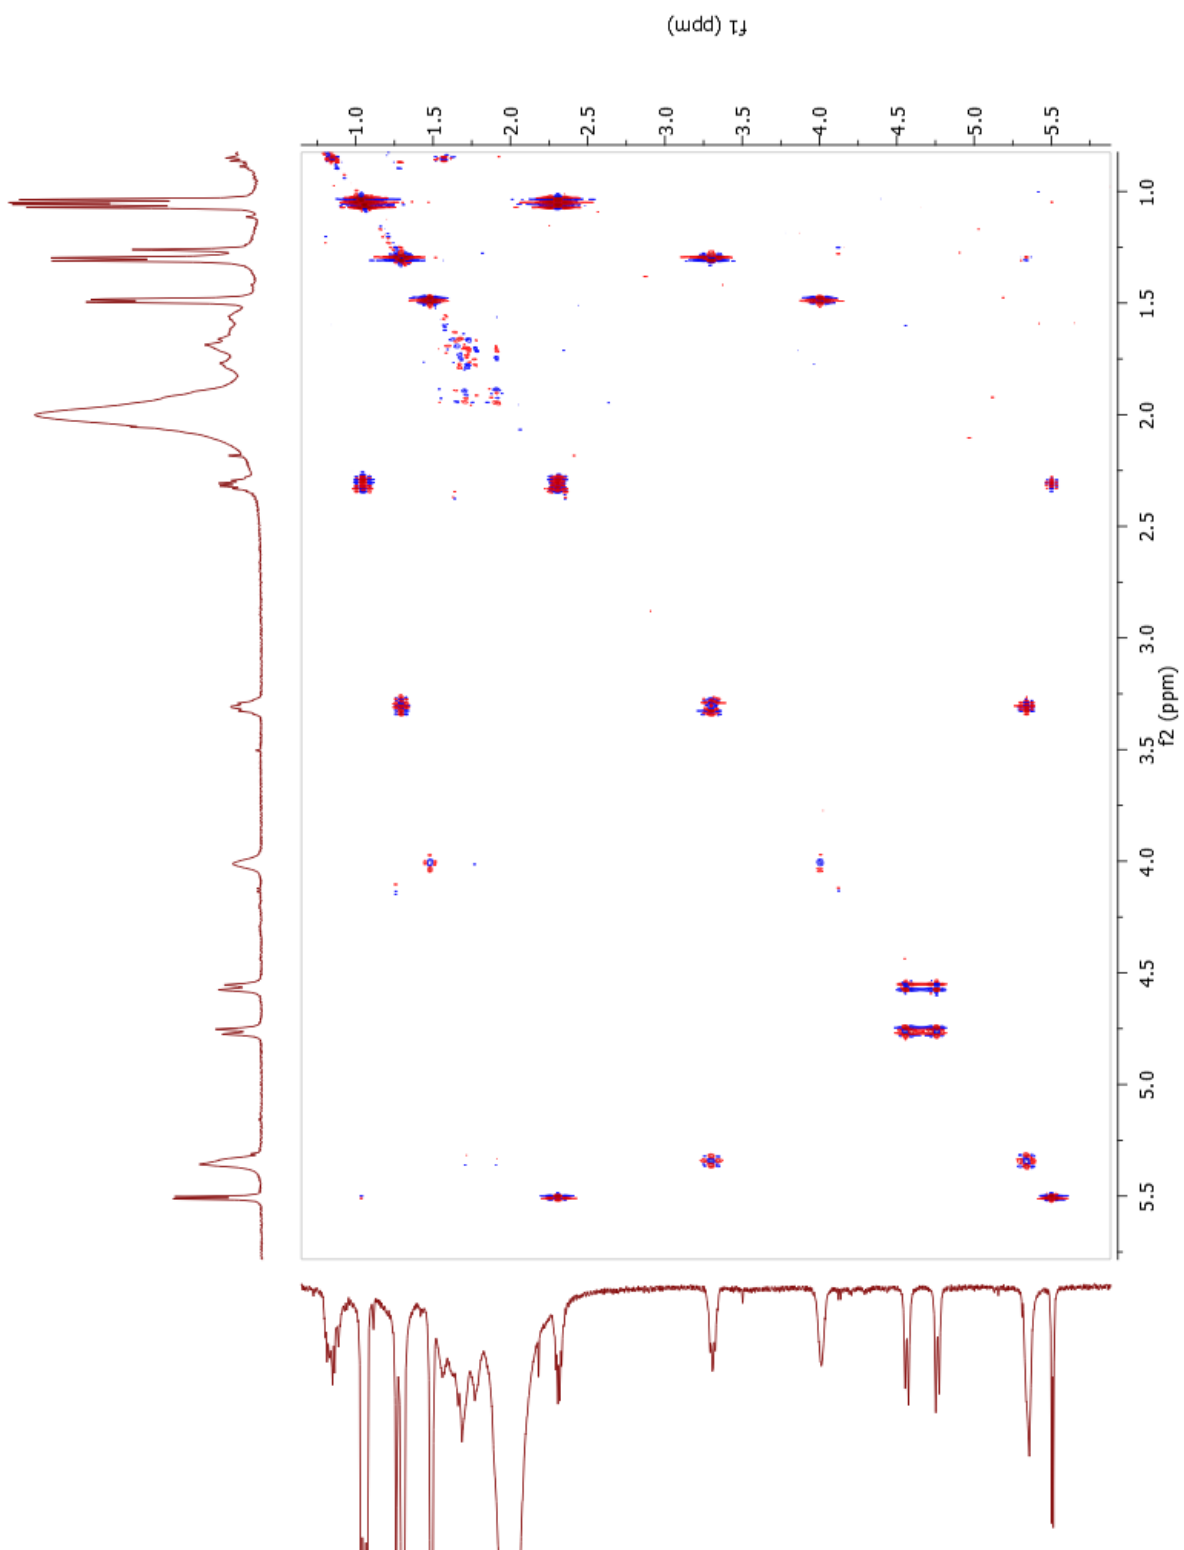

Figure S15. NOESY spectrum of lyngbyabellin L (**2**) (recorded in CDCl<sub>3</sub> at 600 MHz)

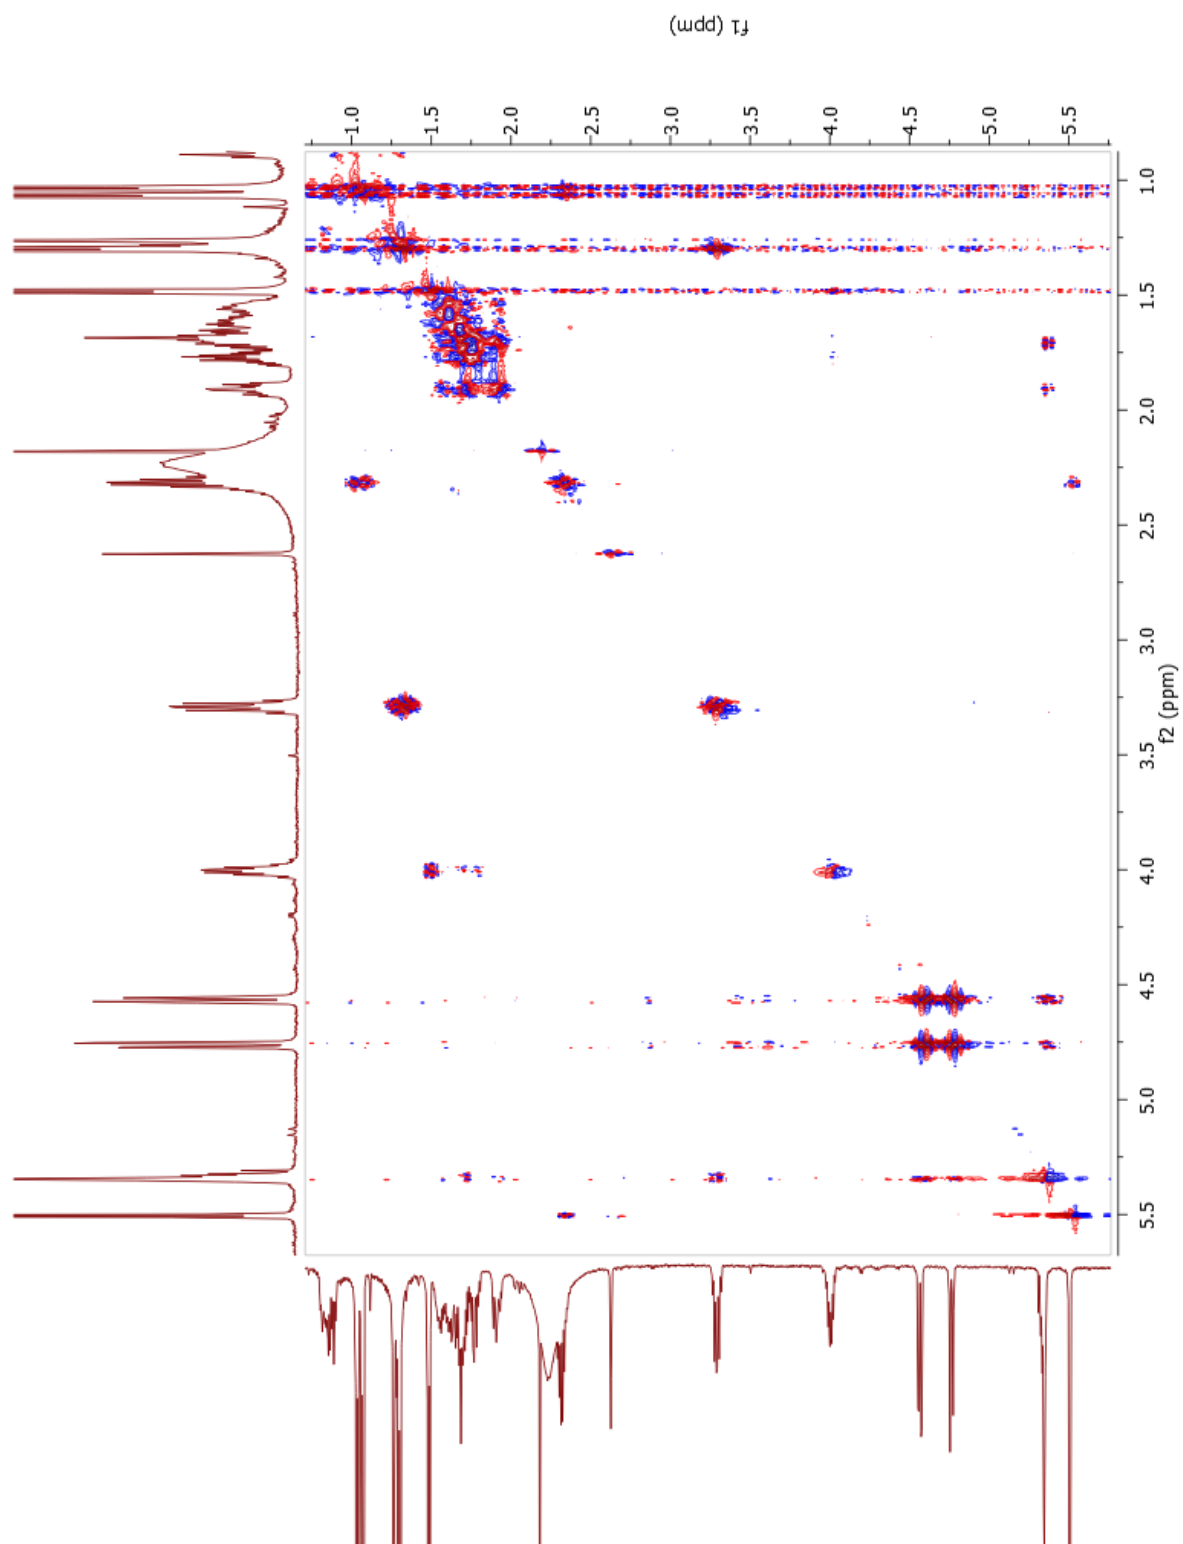

Figure S16. HETLOC spectrum of lyngbyabellin L (**2**) (recorded in CDCl<sub>3</sub> at 600 MHz)

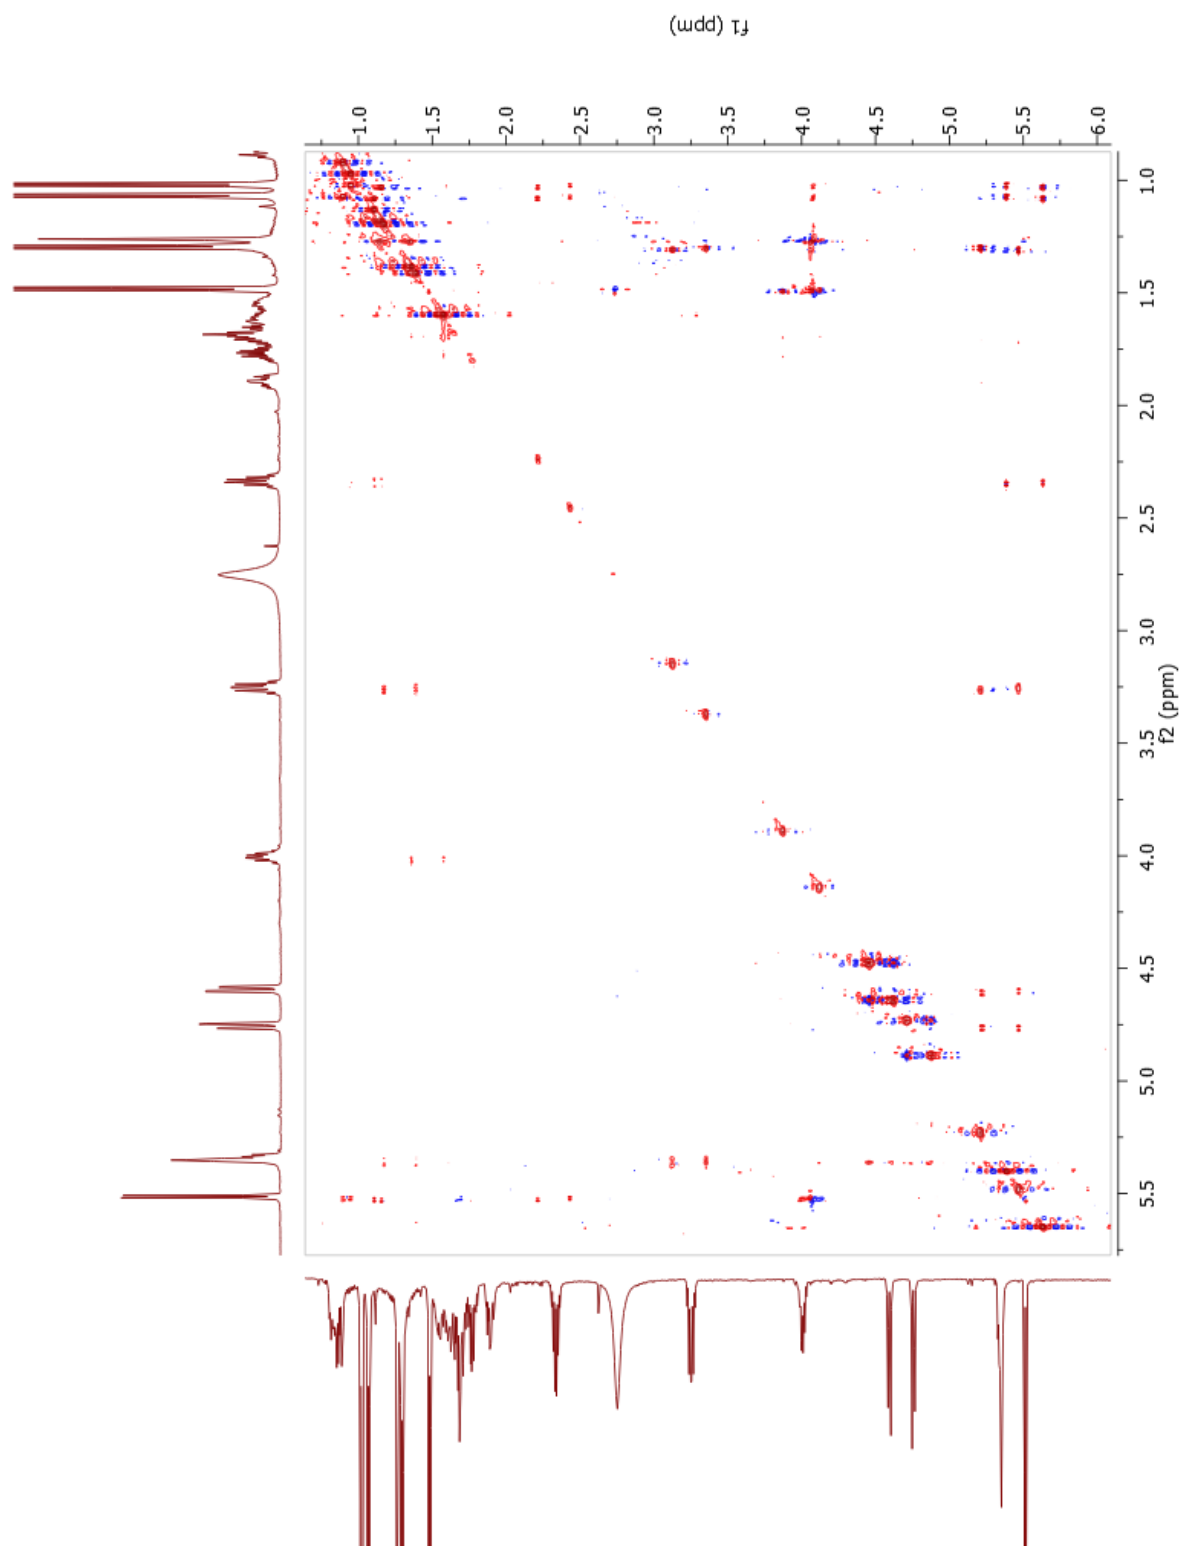

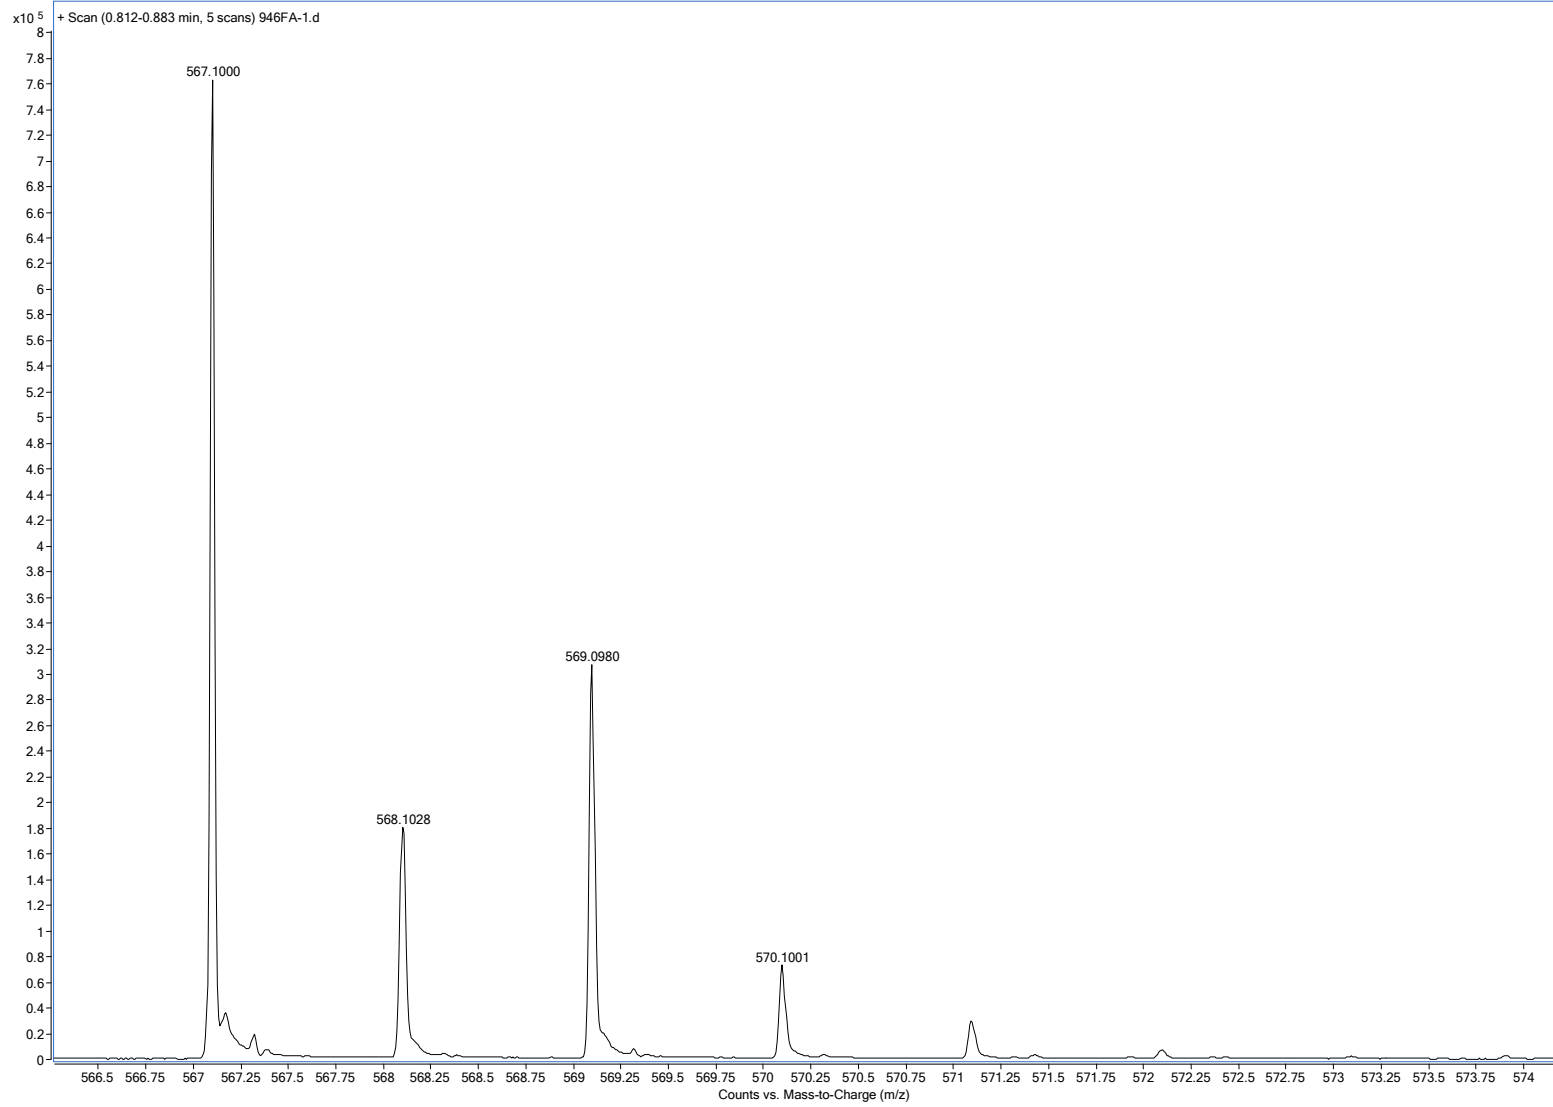

Figure S17. HR ESITOFMS of 7-*epi*-lyngbyabellin L (3).

Figure S18.  $^1\text{H}$  NMR spectrum of 7-*epi*-lyngbyabellin L (**3**) (recorded in  $\text{CDCl}_3$  at 500 MHz).

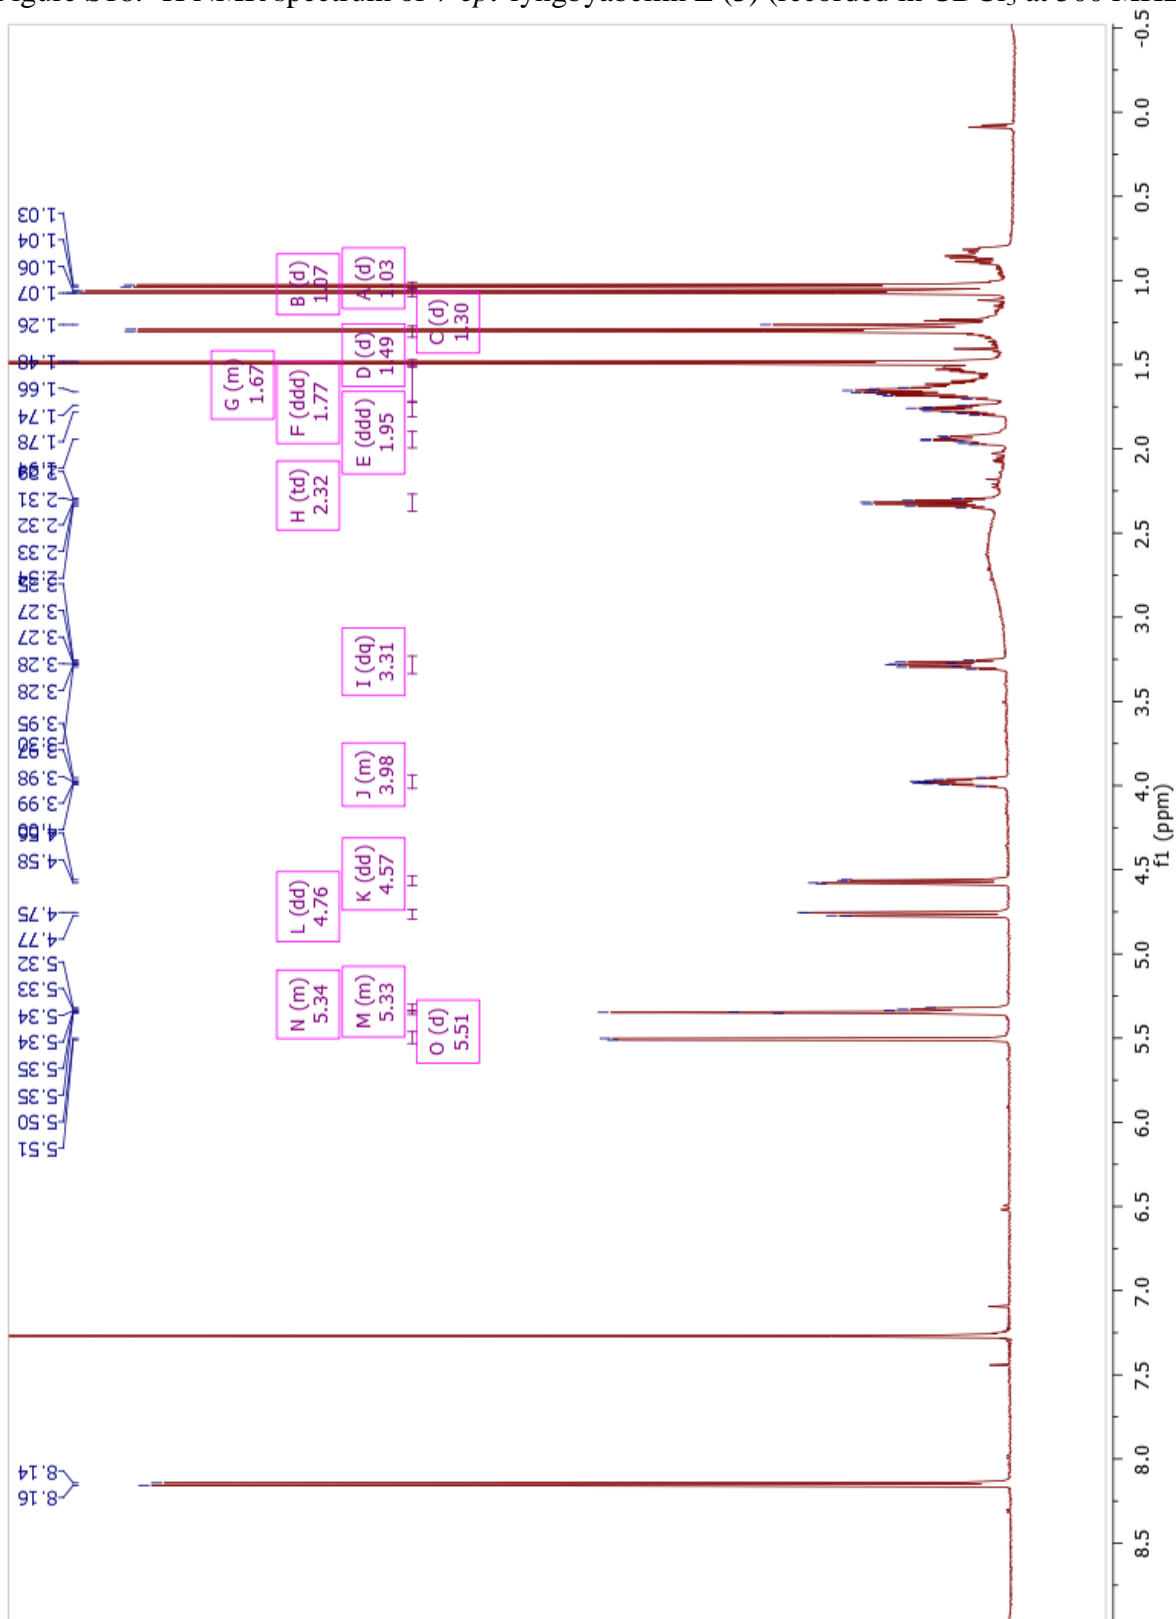

Figure S19.  $^{13}\text{C}$  NMR spectrum of 7-*epi*-lyngbyabellin L (**3**) (recorded in  $\text{CDCl}_3$  at 125 MHz).

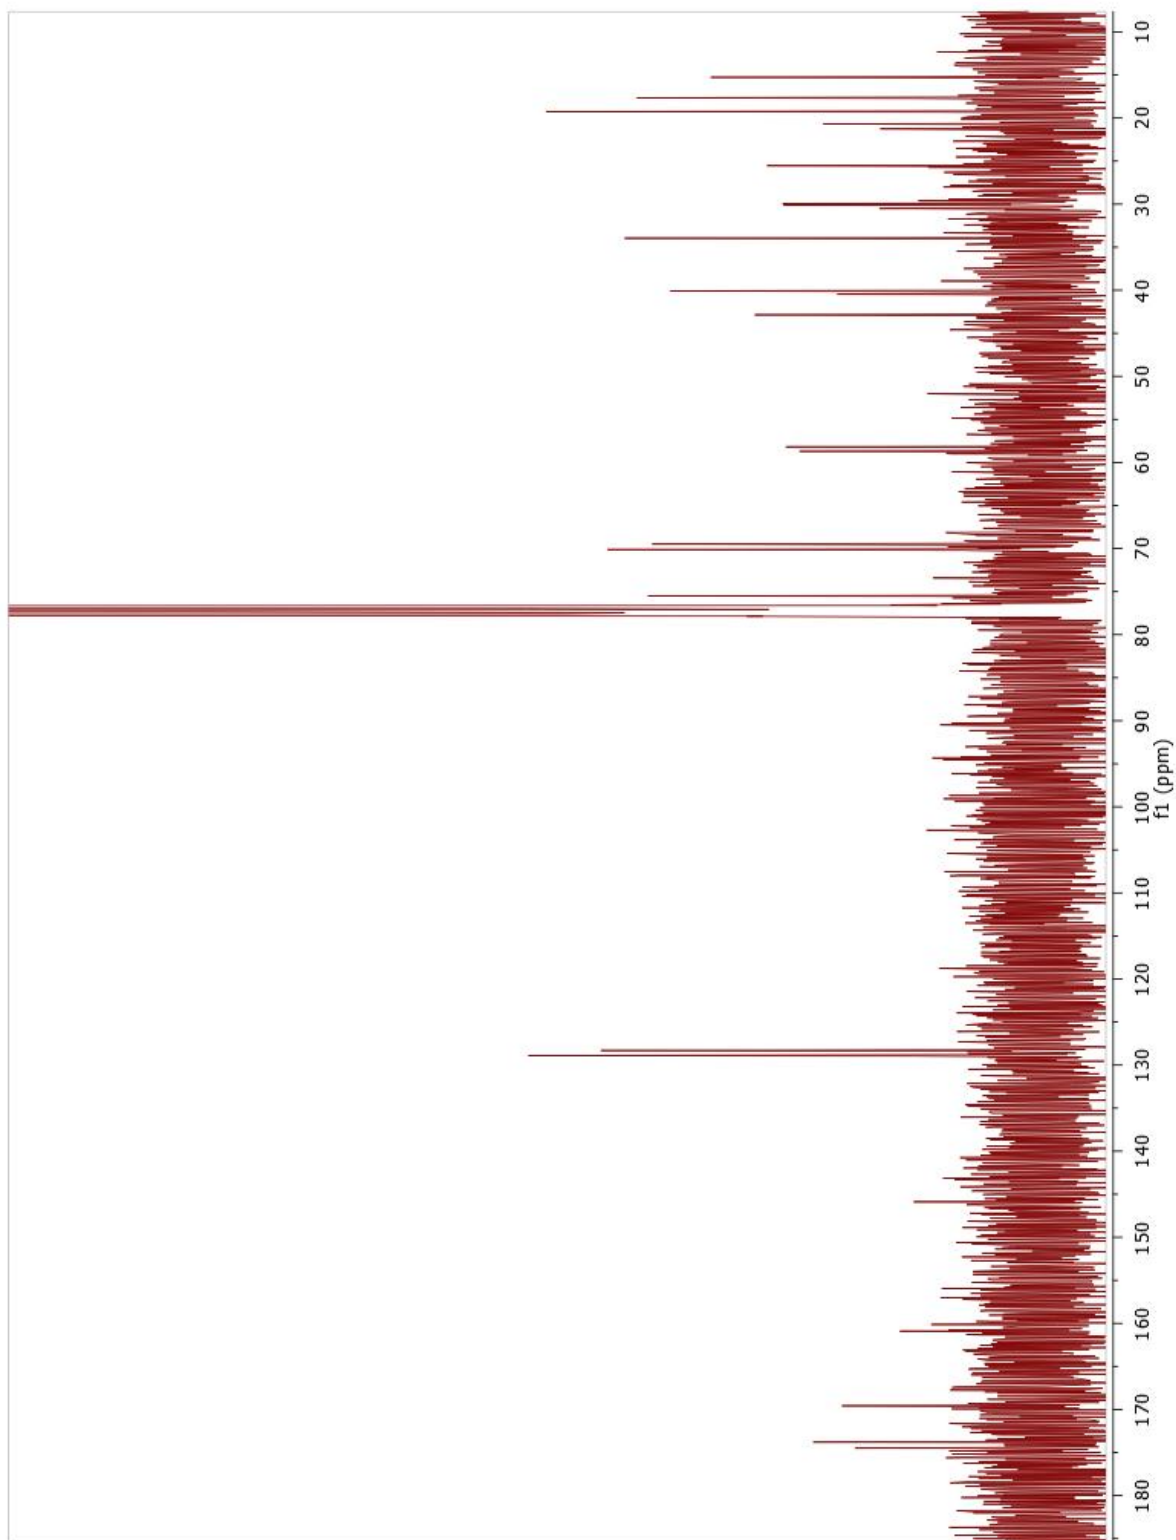

Figure S20. gHSQC spectrum of 7-*epi*-lyngbyabellin L (**3**) (recorded in CDCl<sub>3</sub> at 500 MHz).

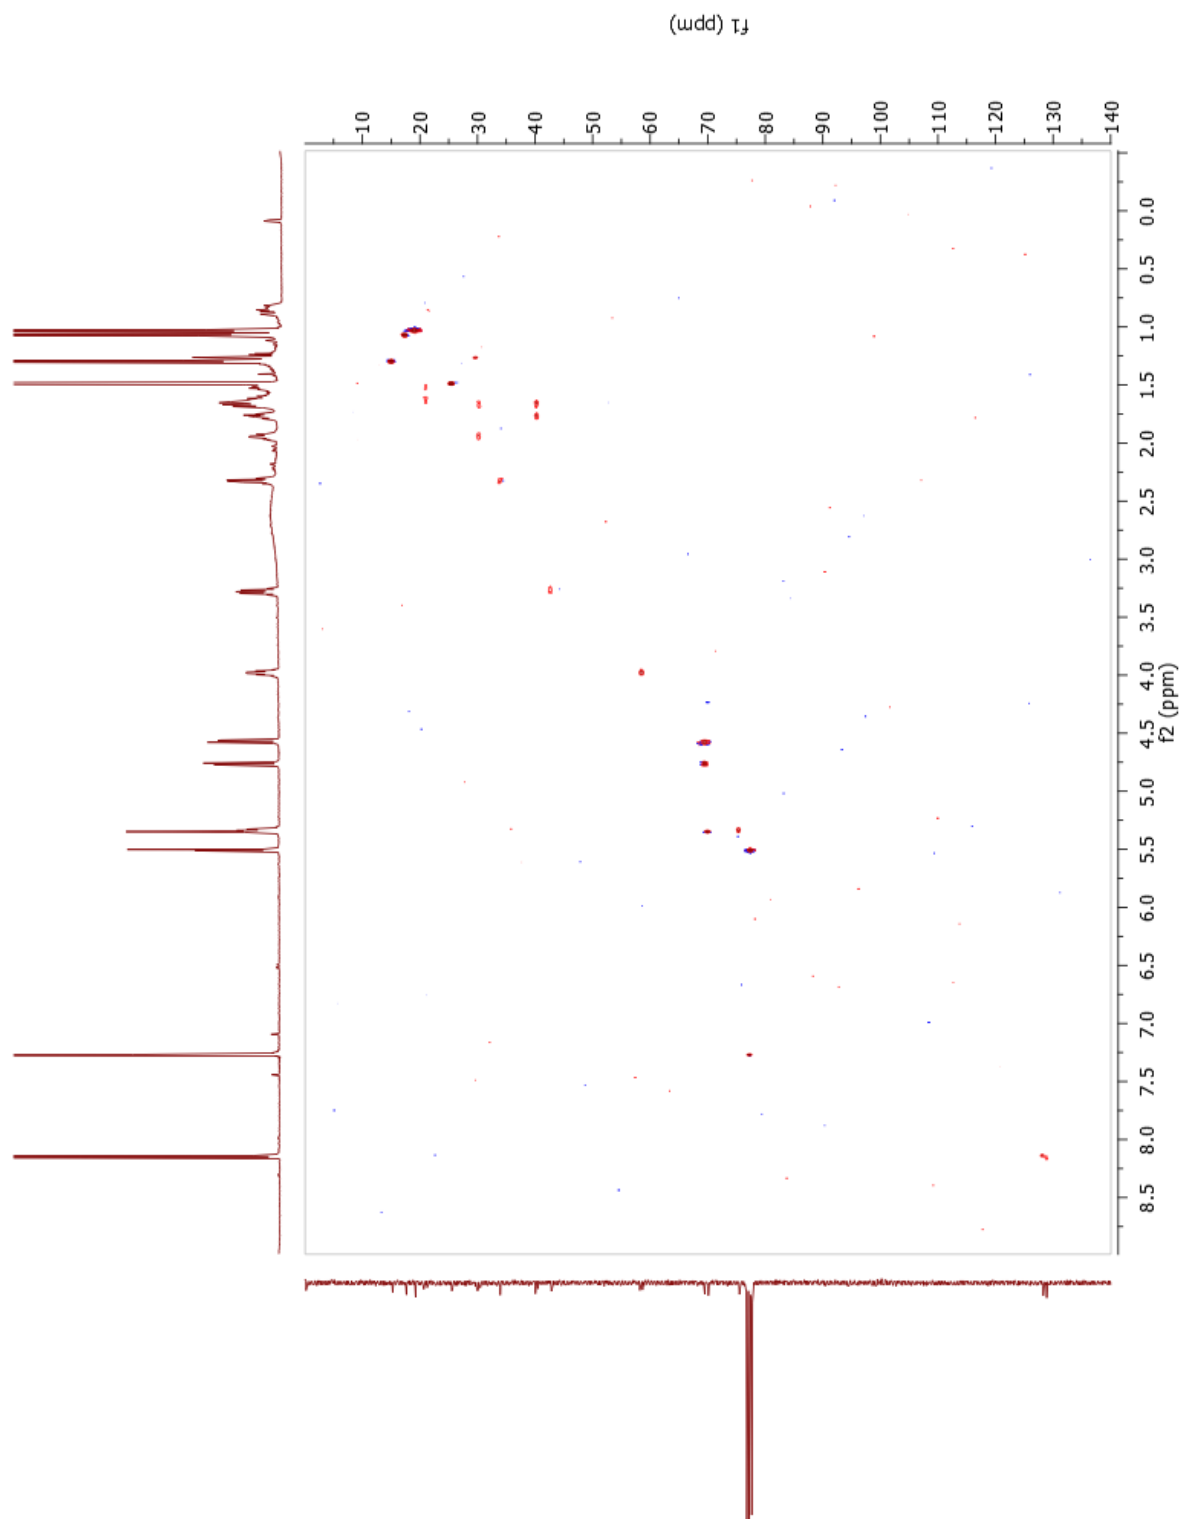

Figure S21. gCOSY spectrum of 7-*epi*-lyngbyabellin L (**3**) (recorded in CDCl<sub>3</sub> at 500 MHz).

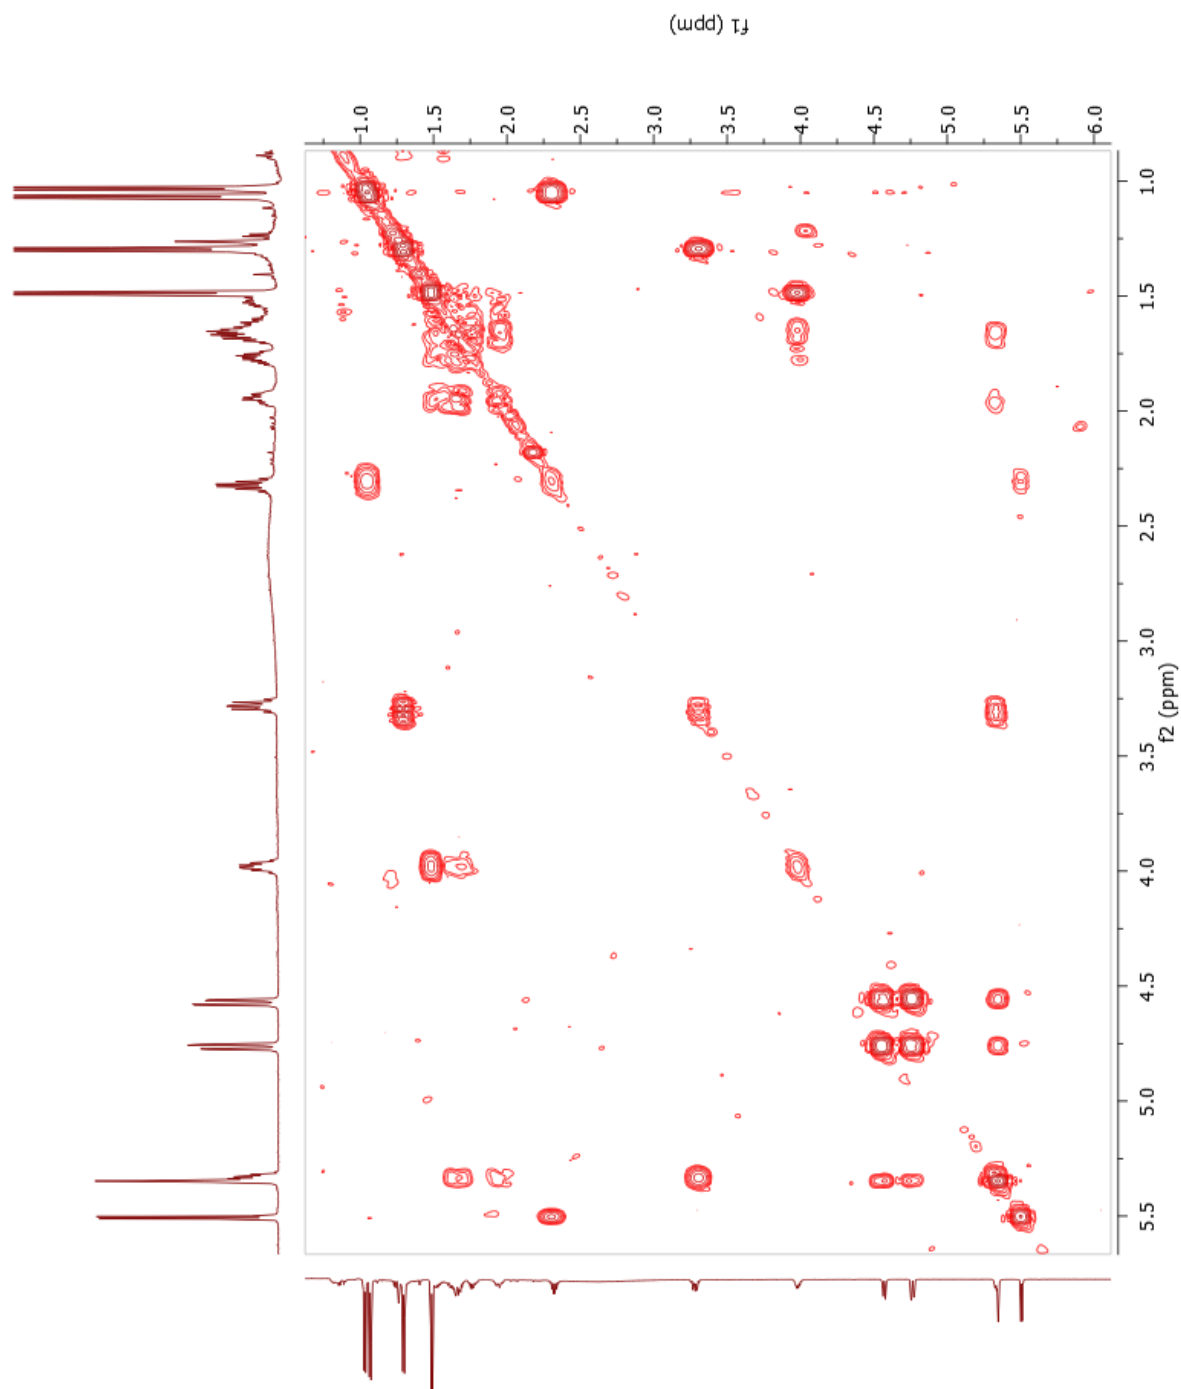



Figure S22. gHMBC spectrum of 7-*epi*-lyngbyabellin L (**3**) (recorded in CDCl<sub>3</sub> at 500 MHz).

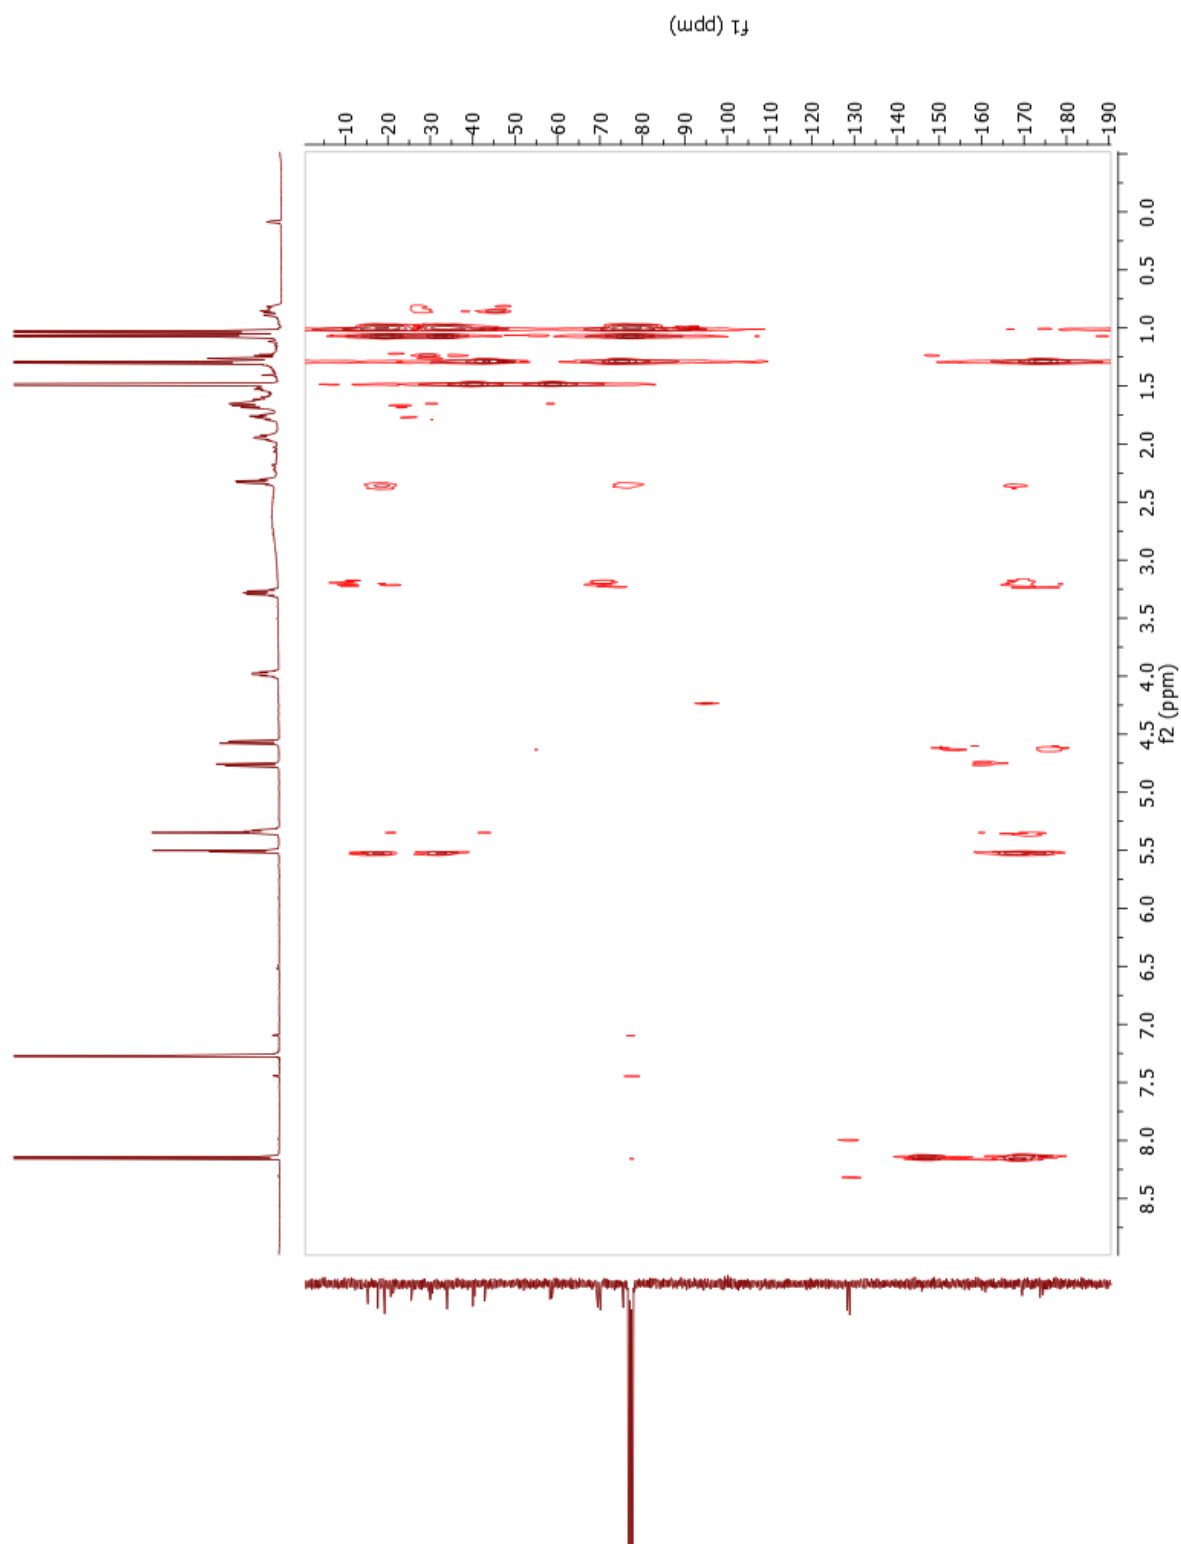

Figure S23. DQF-COSY spectrum of 7-*epi*-lyngbyabellin L (**3**) (recorded in CDCl<sub>3</sub> at 600 MHz).

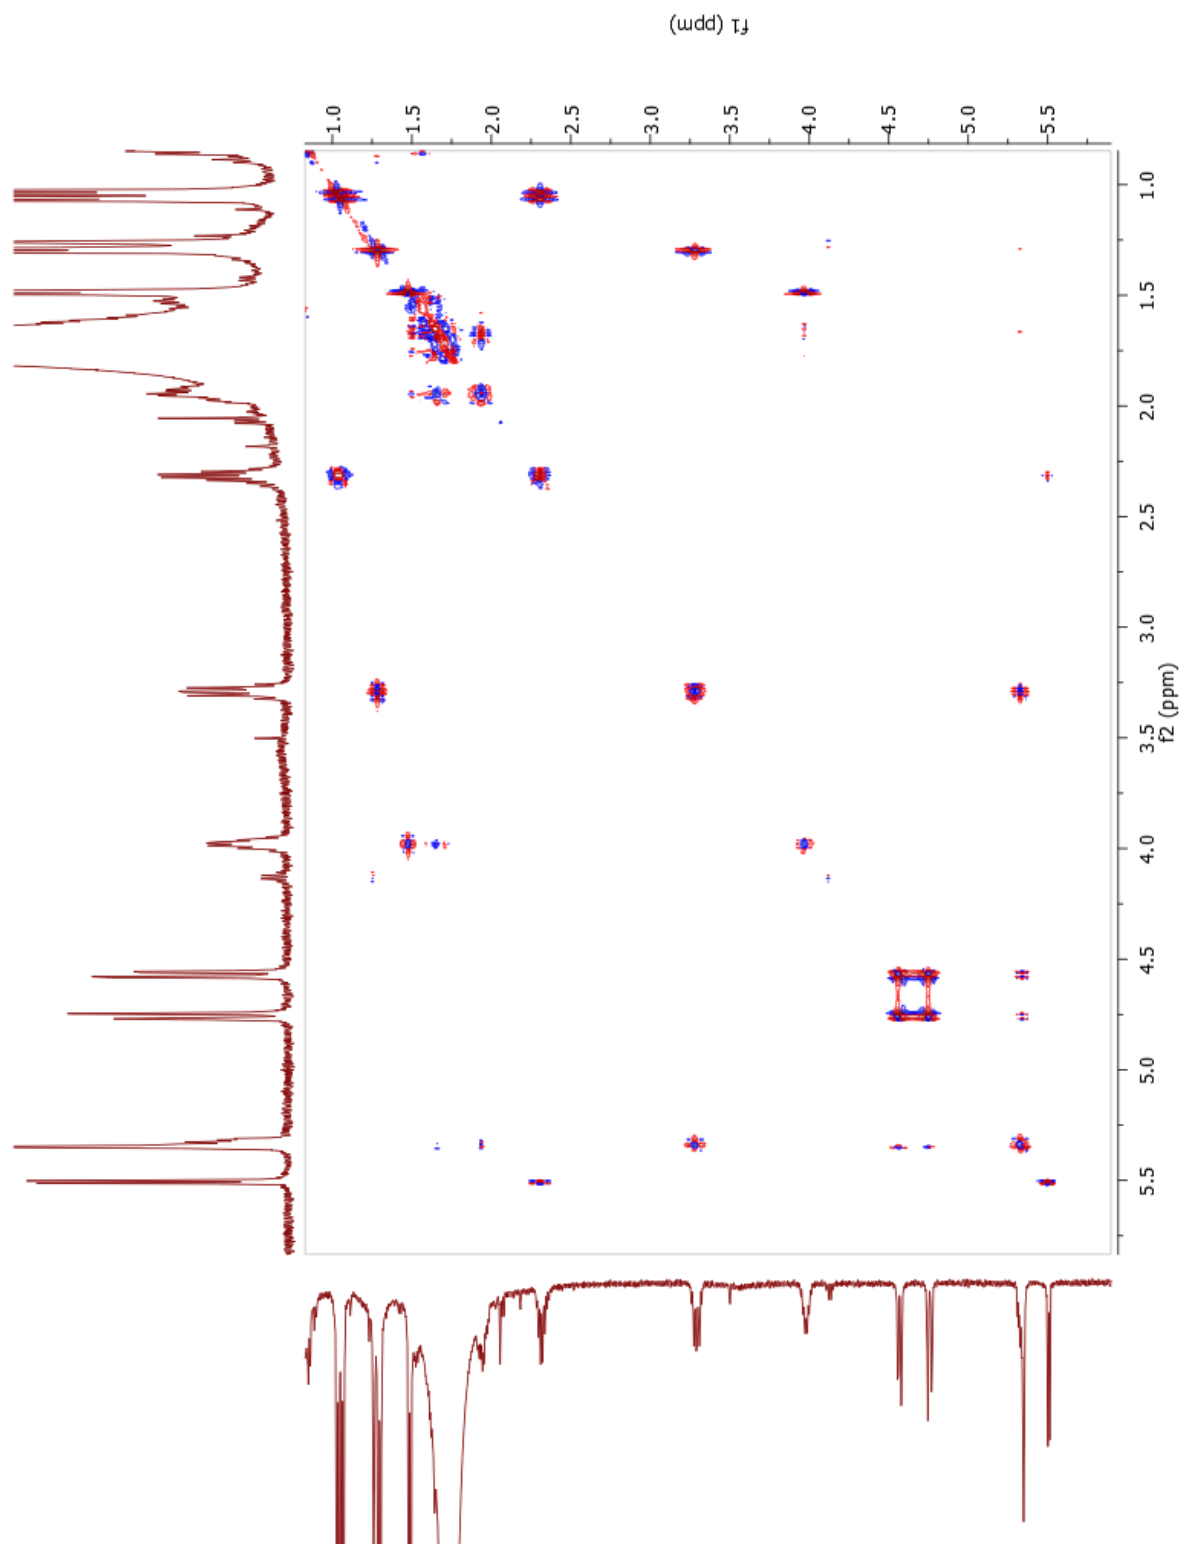

Figure S24. NOESY spectrum of 7-*epi*-lyngbyabellin L (**3**) (recorded in CDCl<sub>3</sub> at 600 MHz).

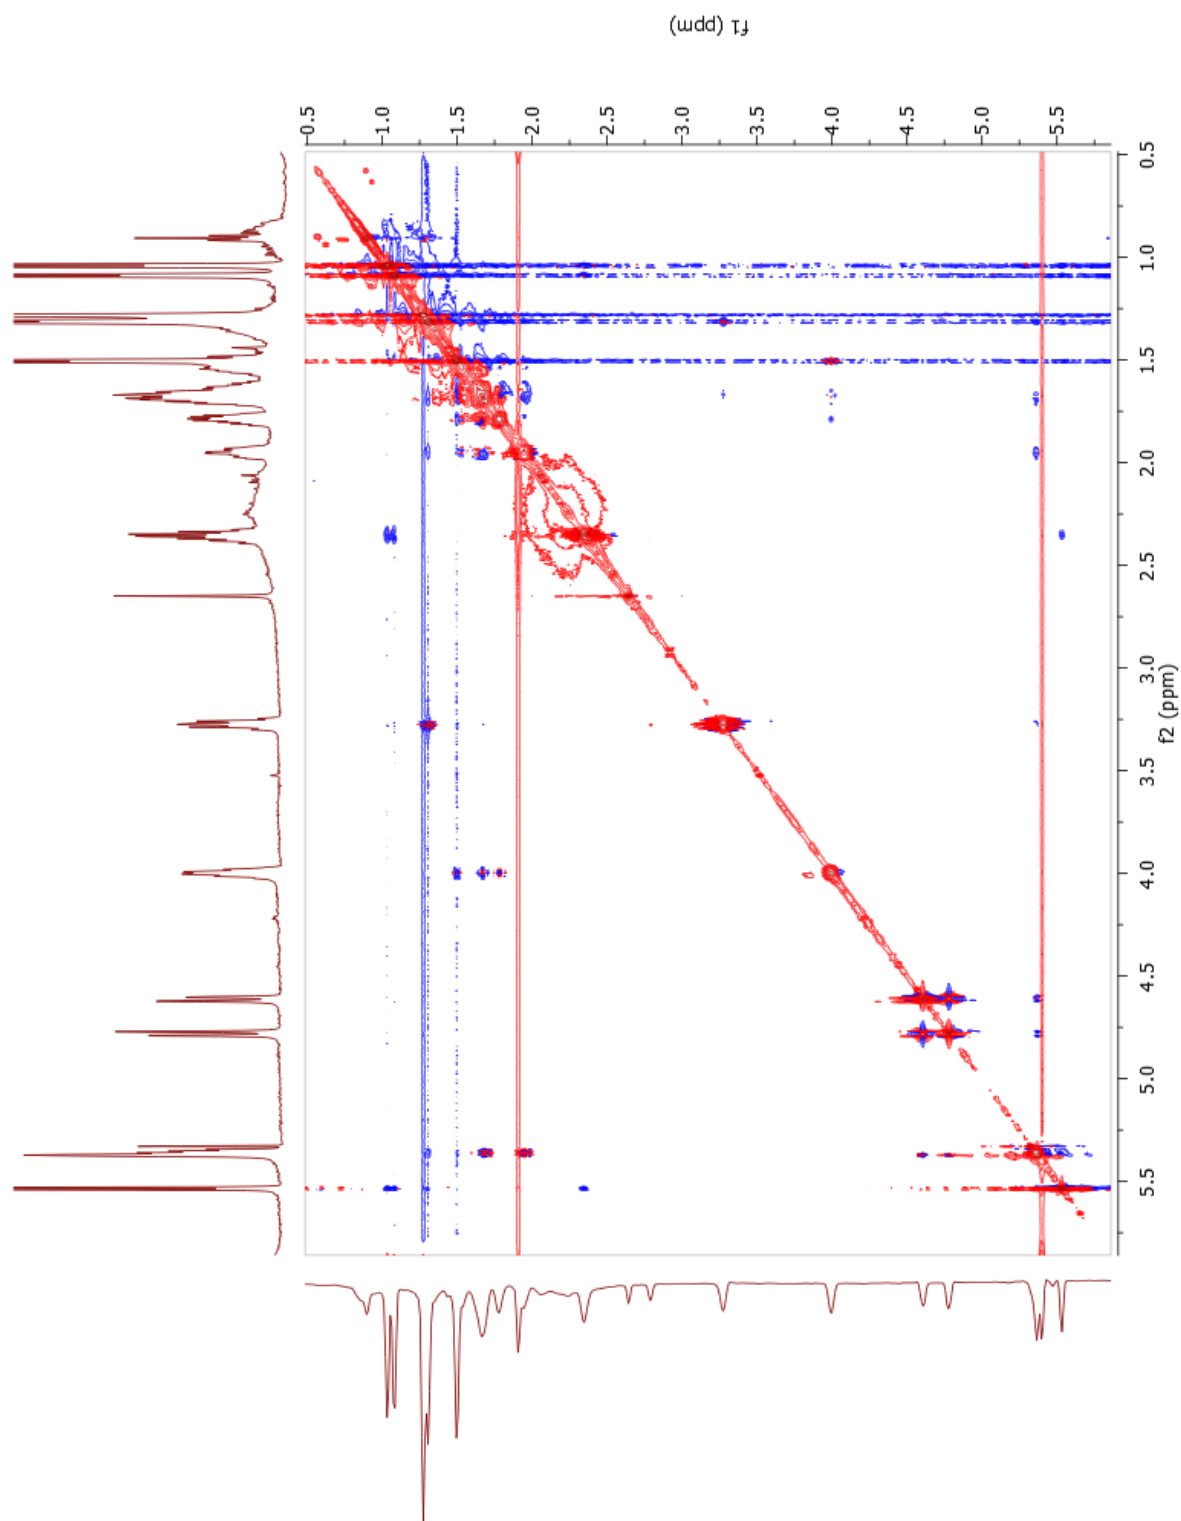

Figure S25. HR ESITOFMS of lyngbyabellin M (4).

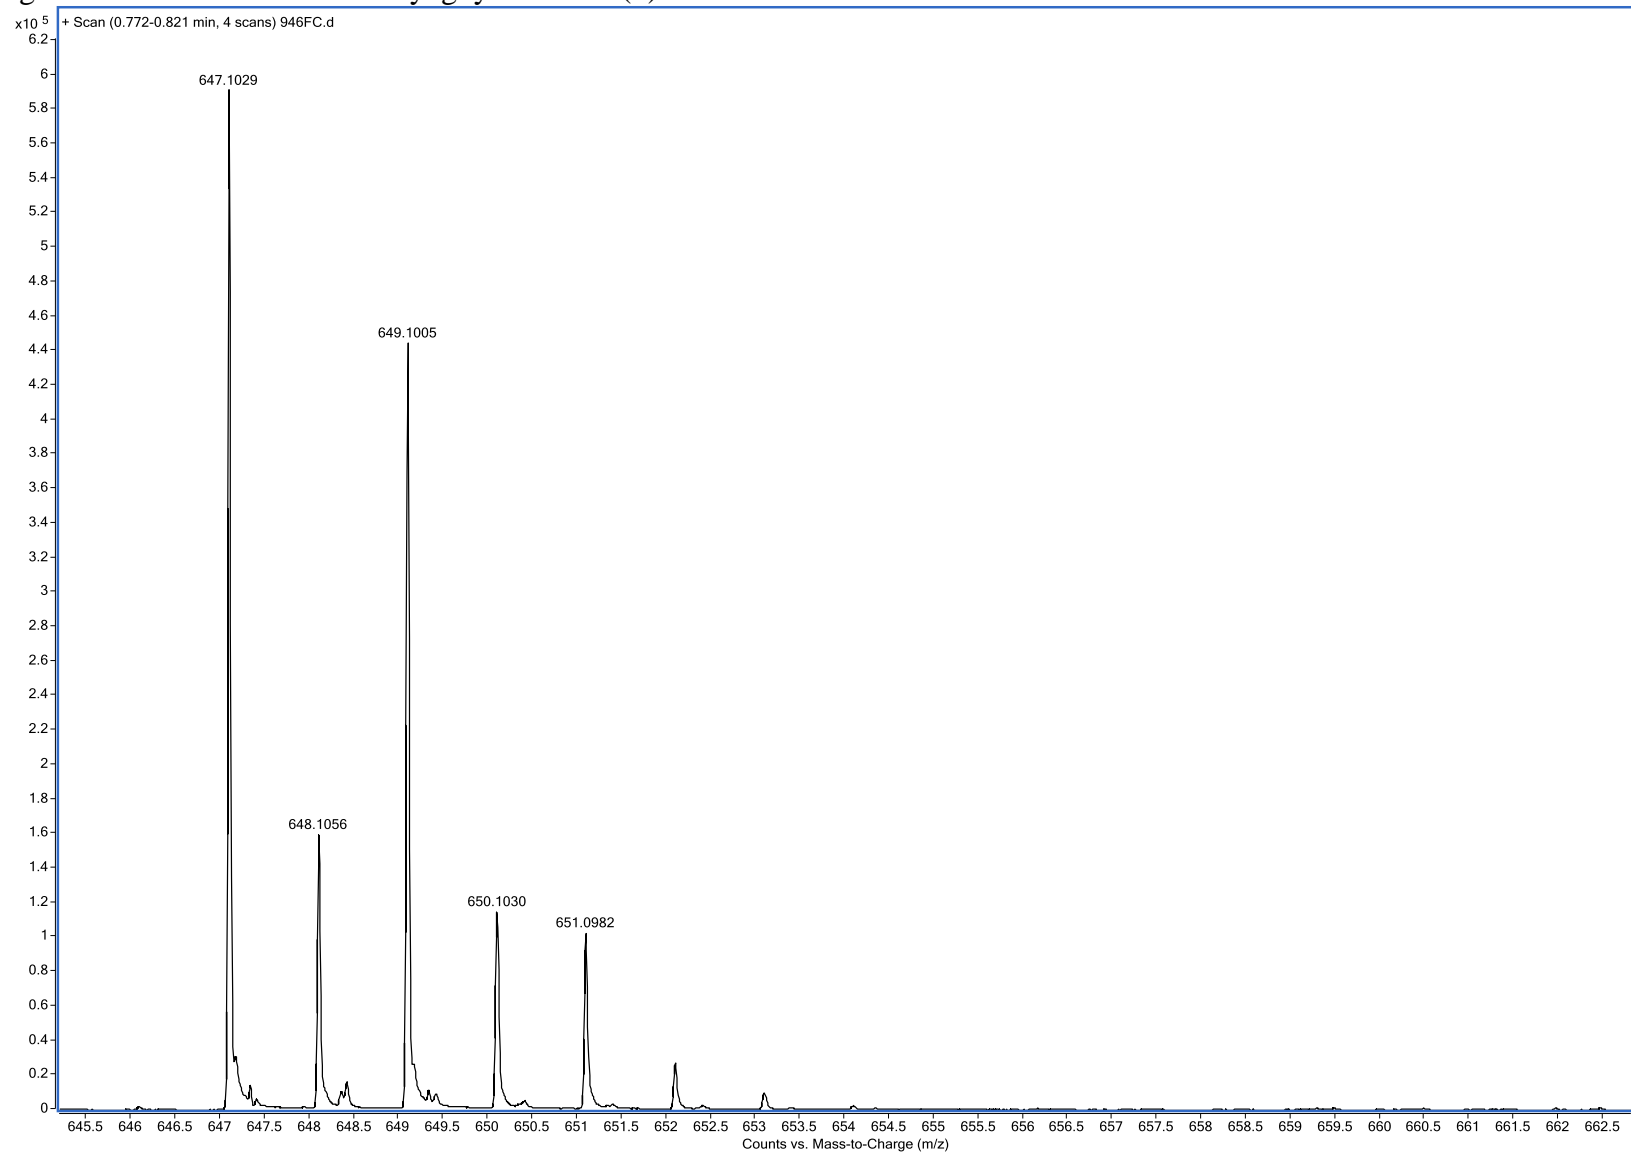

Figure S26.  $^1\text{H}$  NMR spectrum of lyngbyabellin M (**4**) (recorded in  $\text{CDCl}_3$  at 500 MHz).

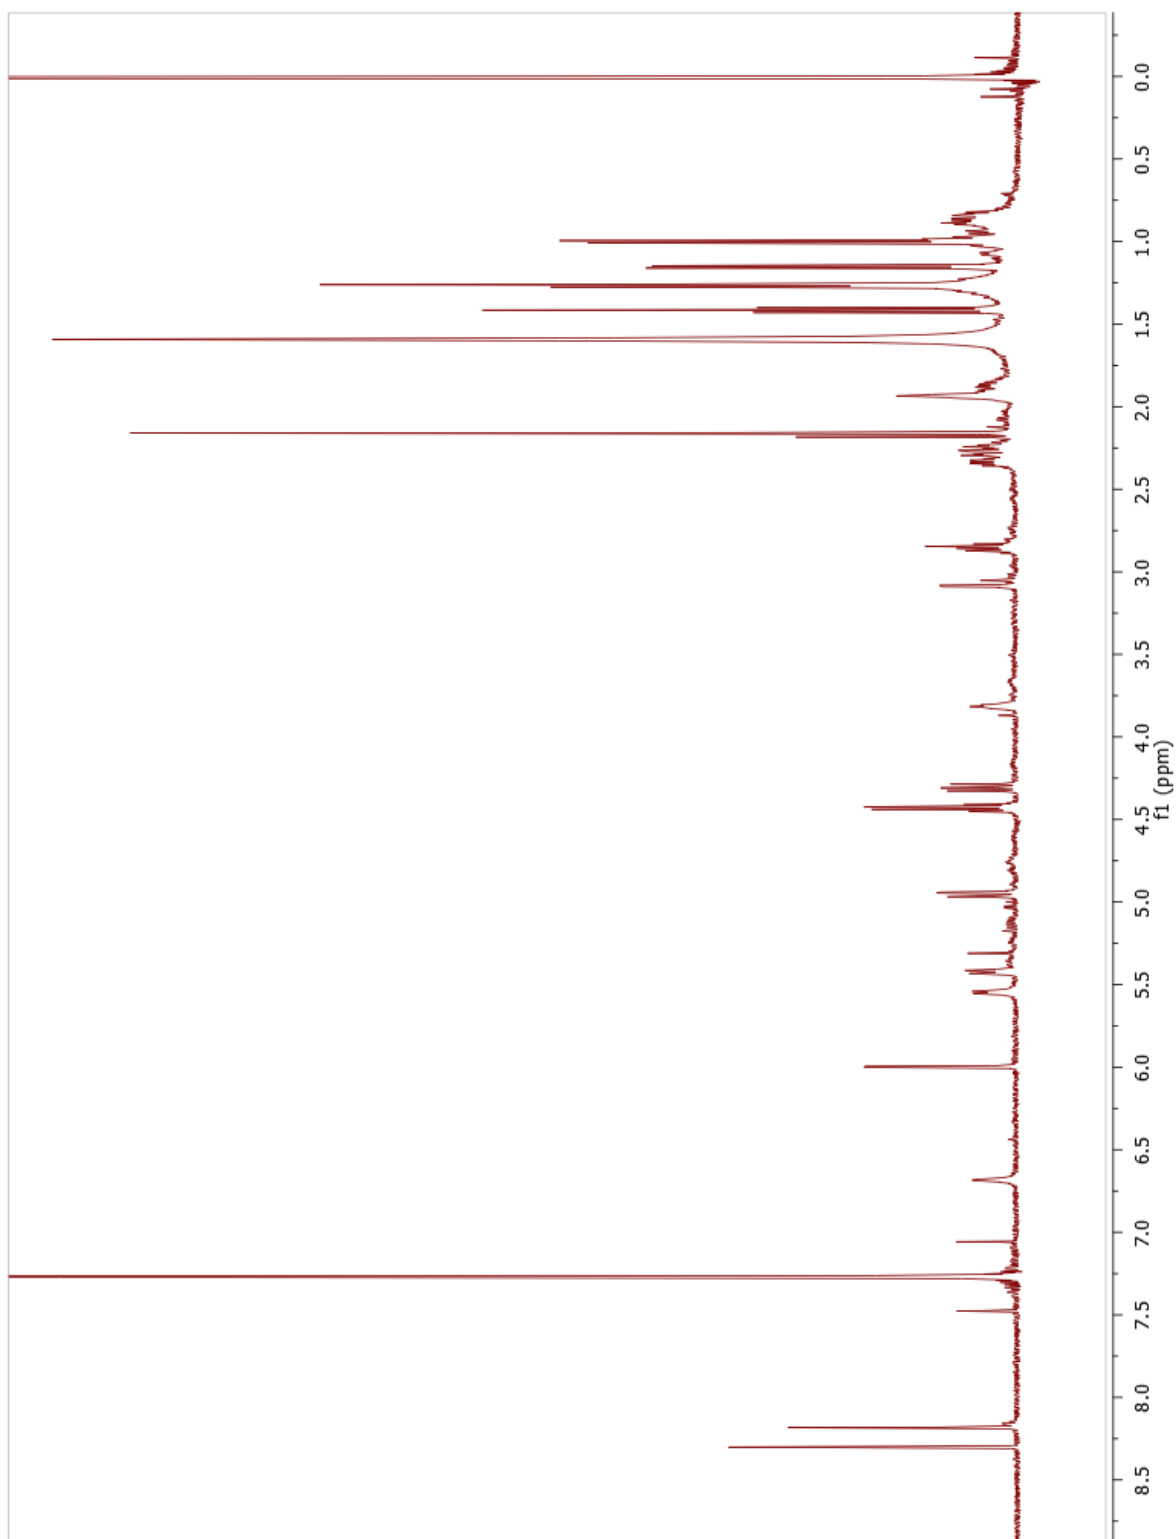

Figure S27.  $^{13}\text{C}$  NMR spectrum of lyngbyabellin M (**4**) (recorded in  $\text{CDCl}_3$  at 125 MHz).

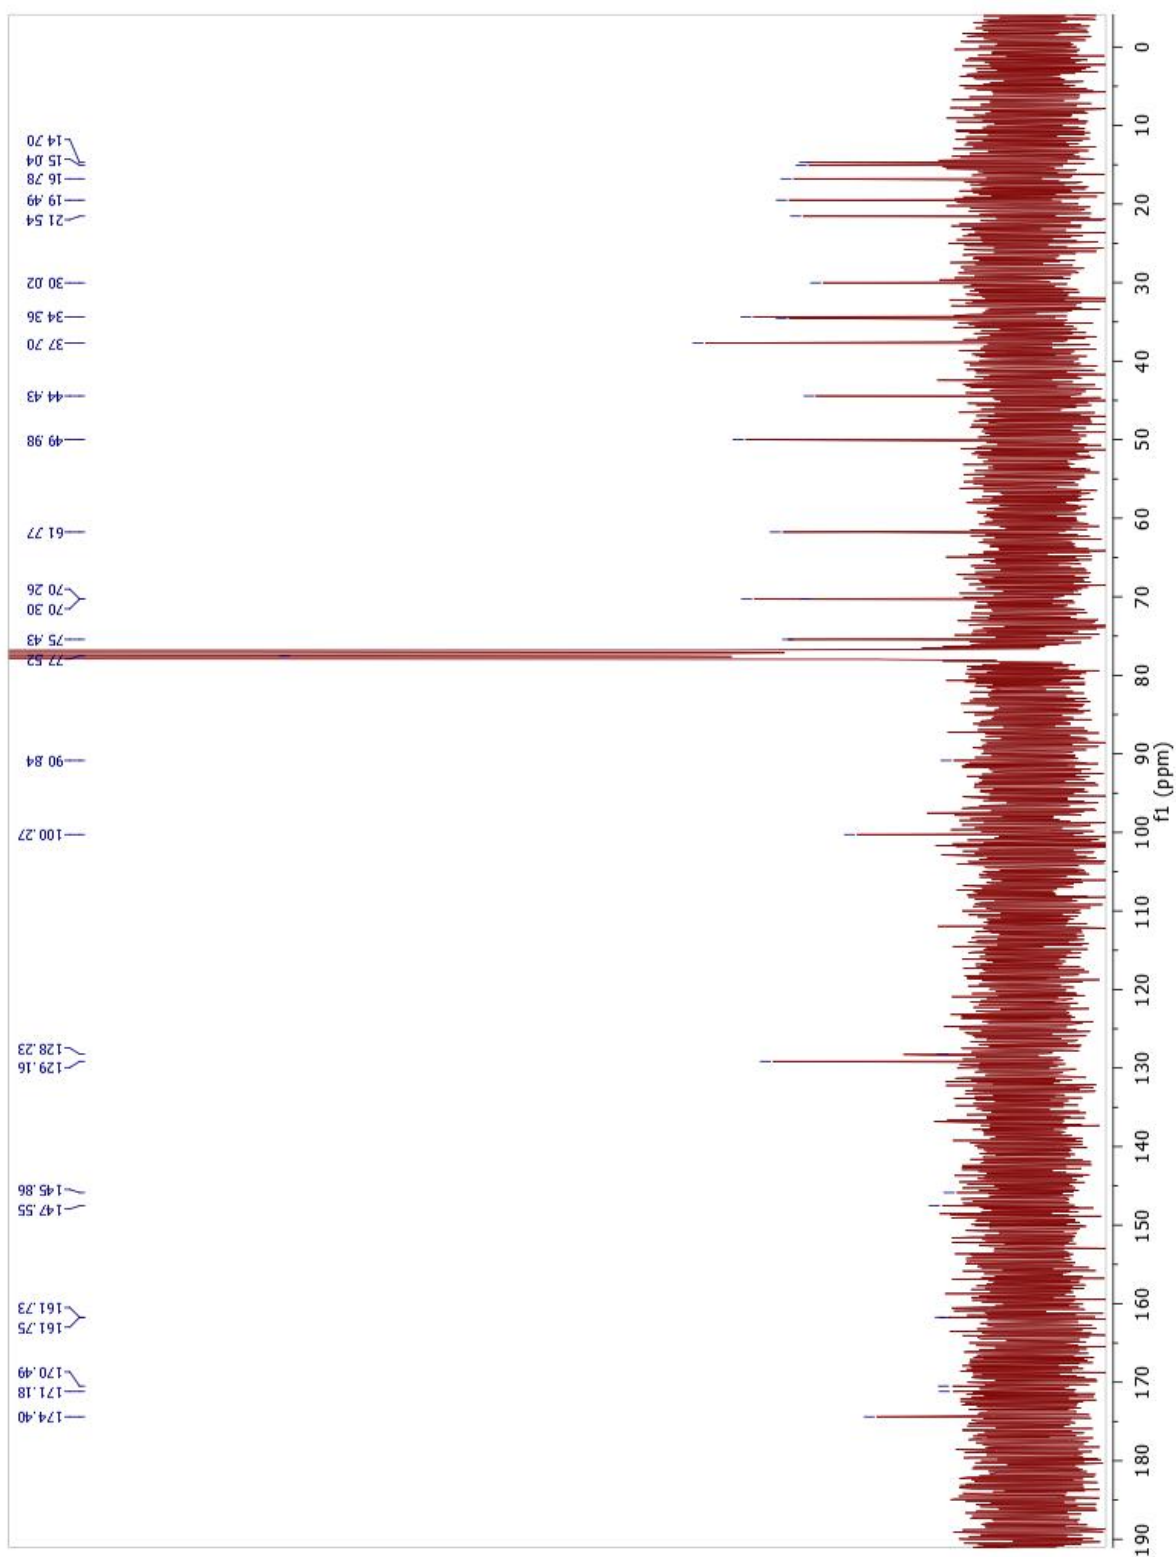

Figure S28. gHSQC spectrum of lyngbyabellin M (**4**) (recorded in CDCl<sub>3</sub> at 600 MHz).

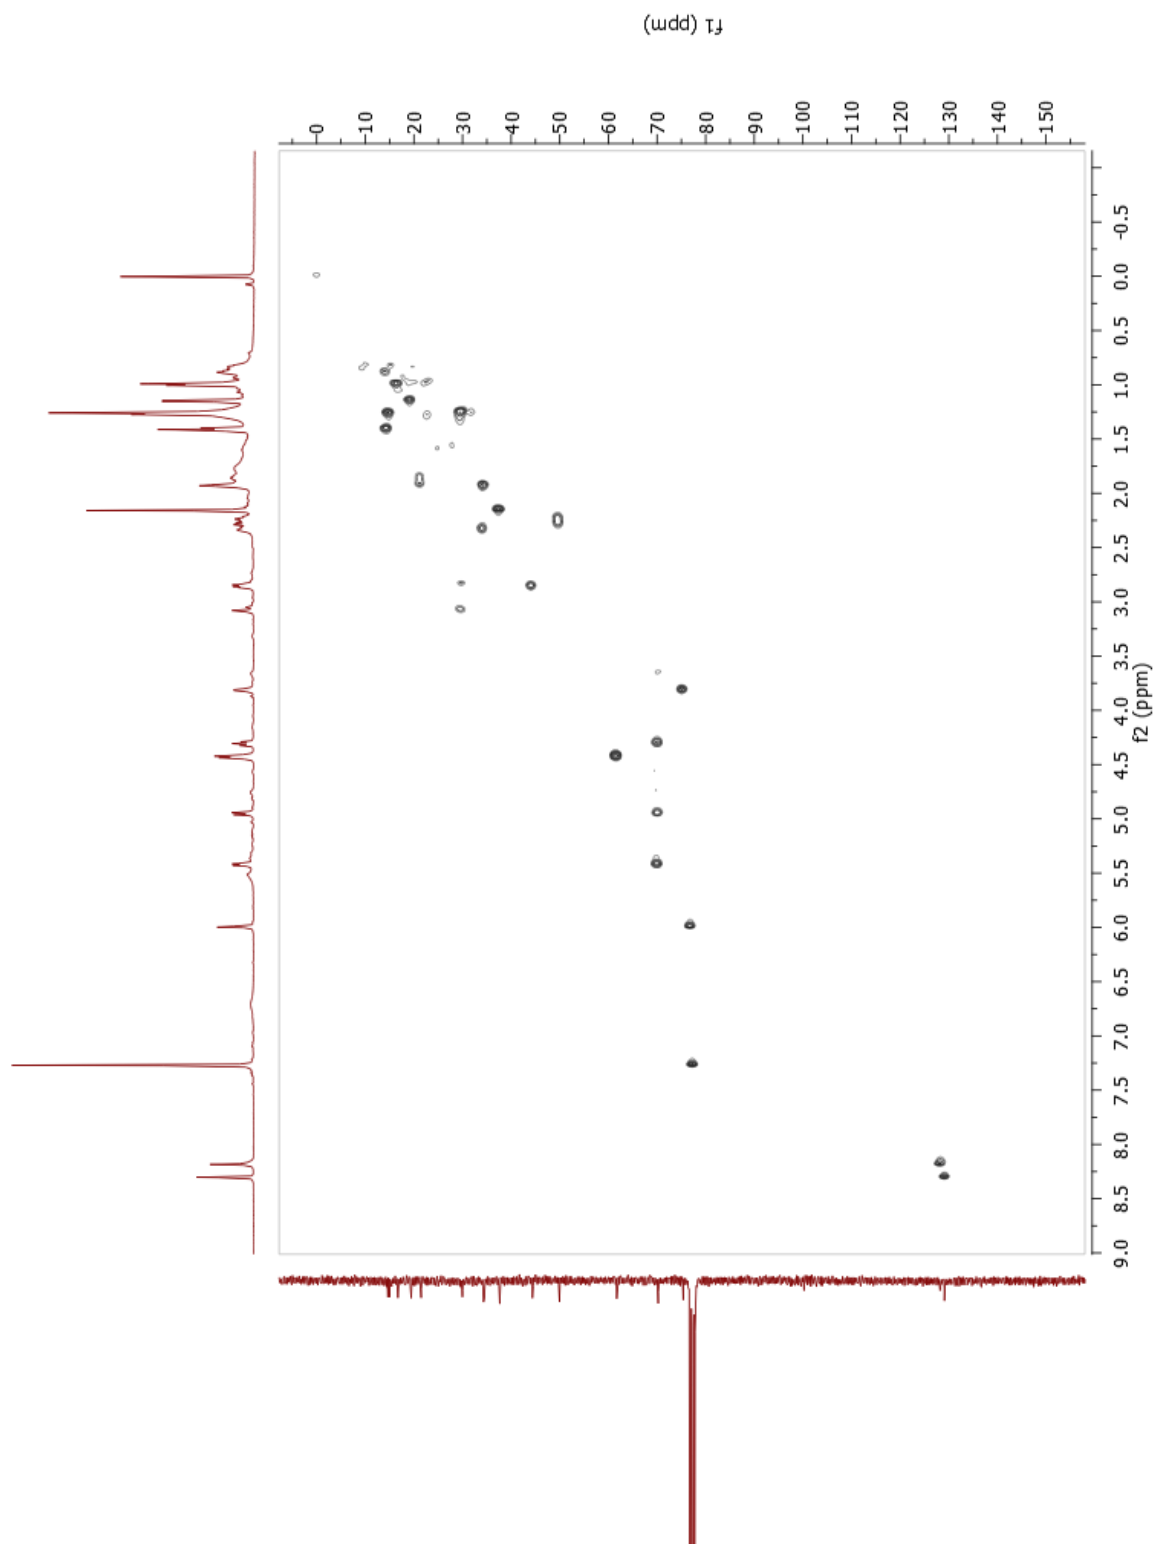

Figure S29. gCOSY spectrum of lyngbyabellin M (4) (recorded in CDCl<sub>3</sub> at 500 MHz).

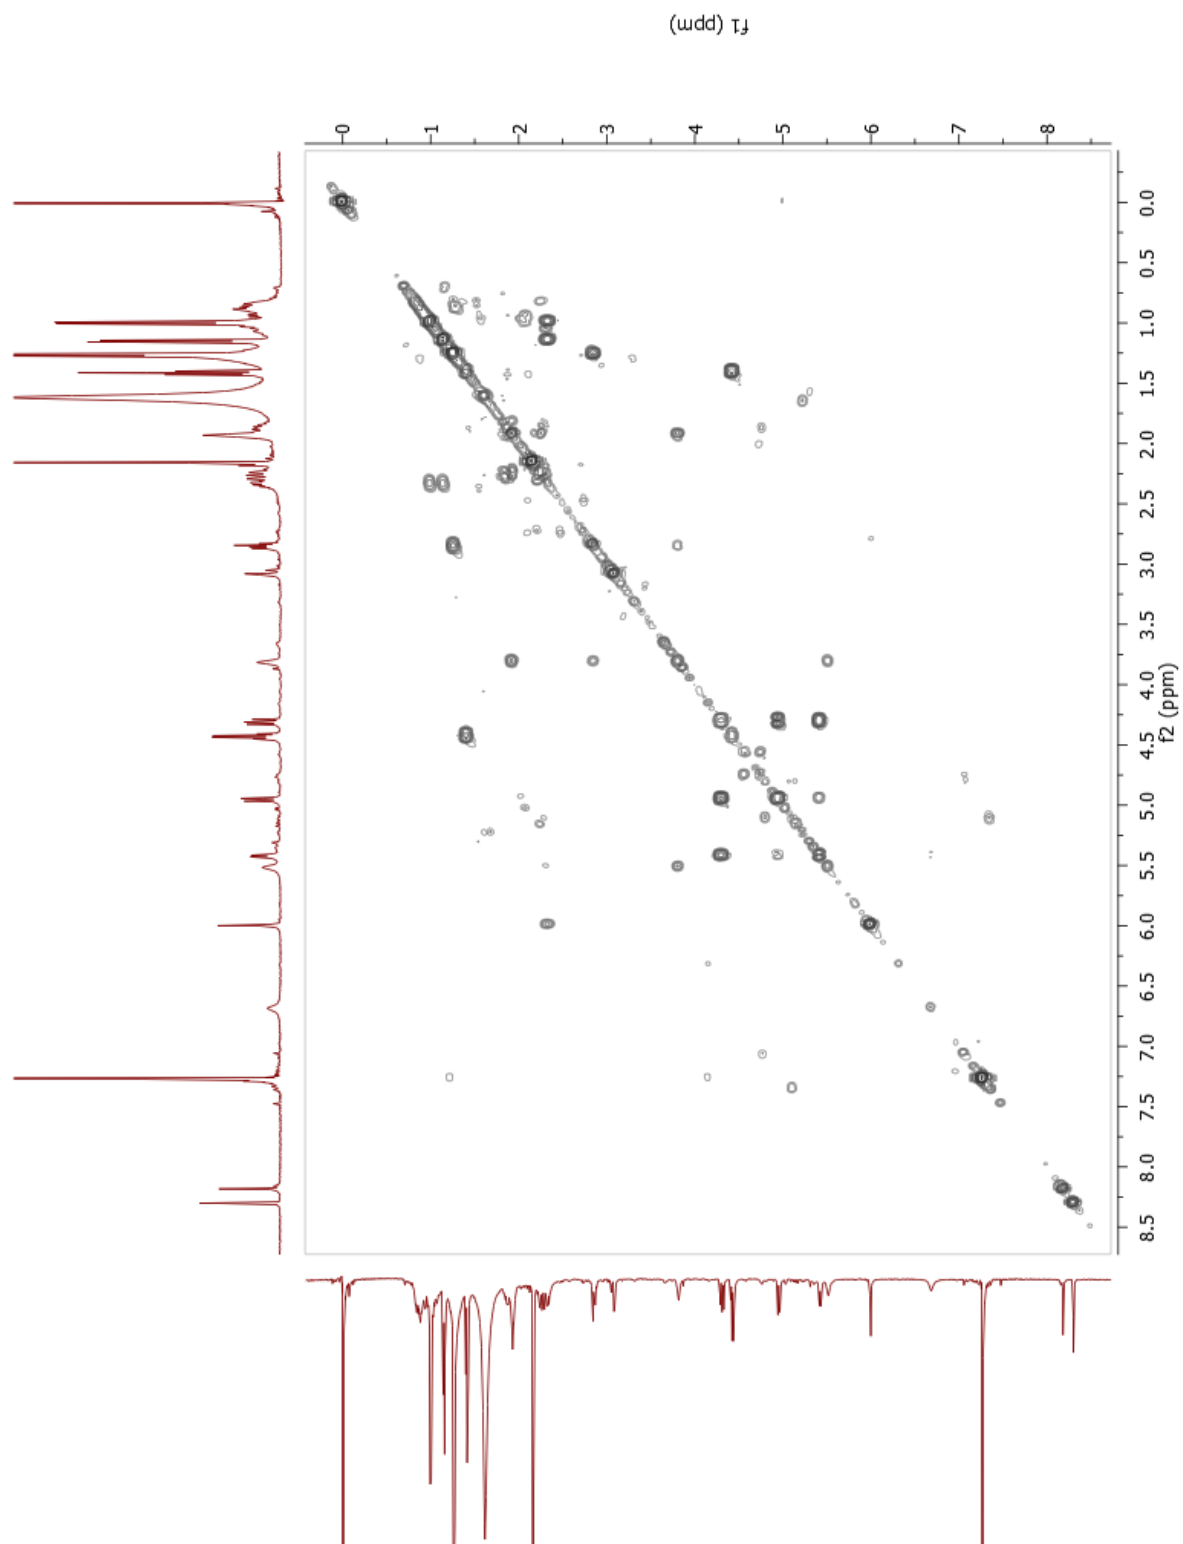



Figure S30. gHMBC spectrum of lyngbyabellin M (**4**) (recorded in CDCl<sub>3</sub> at 500 MHz).

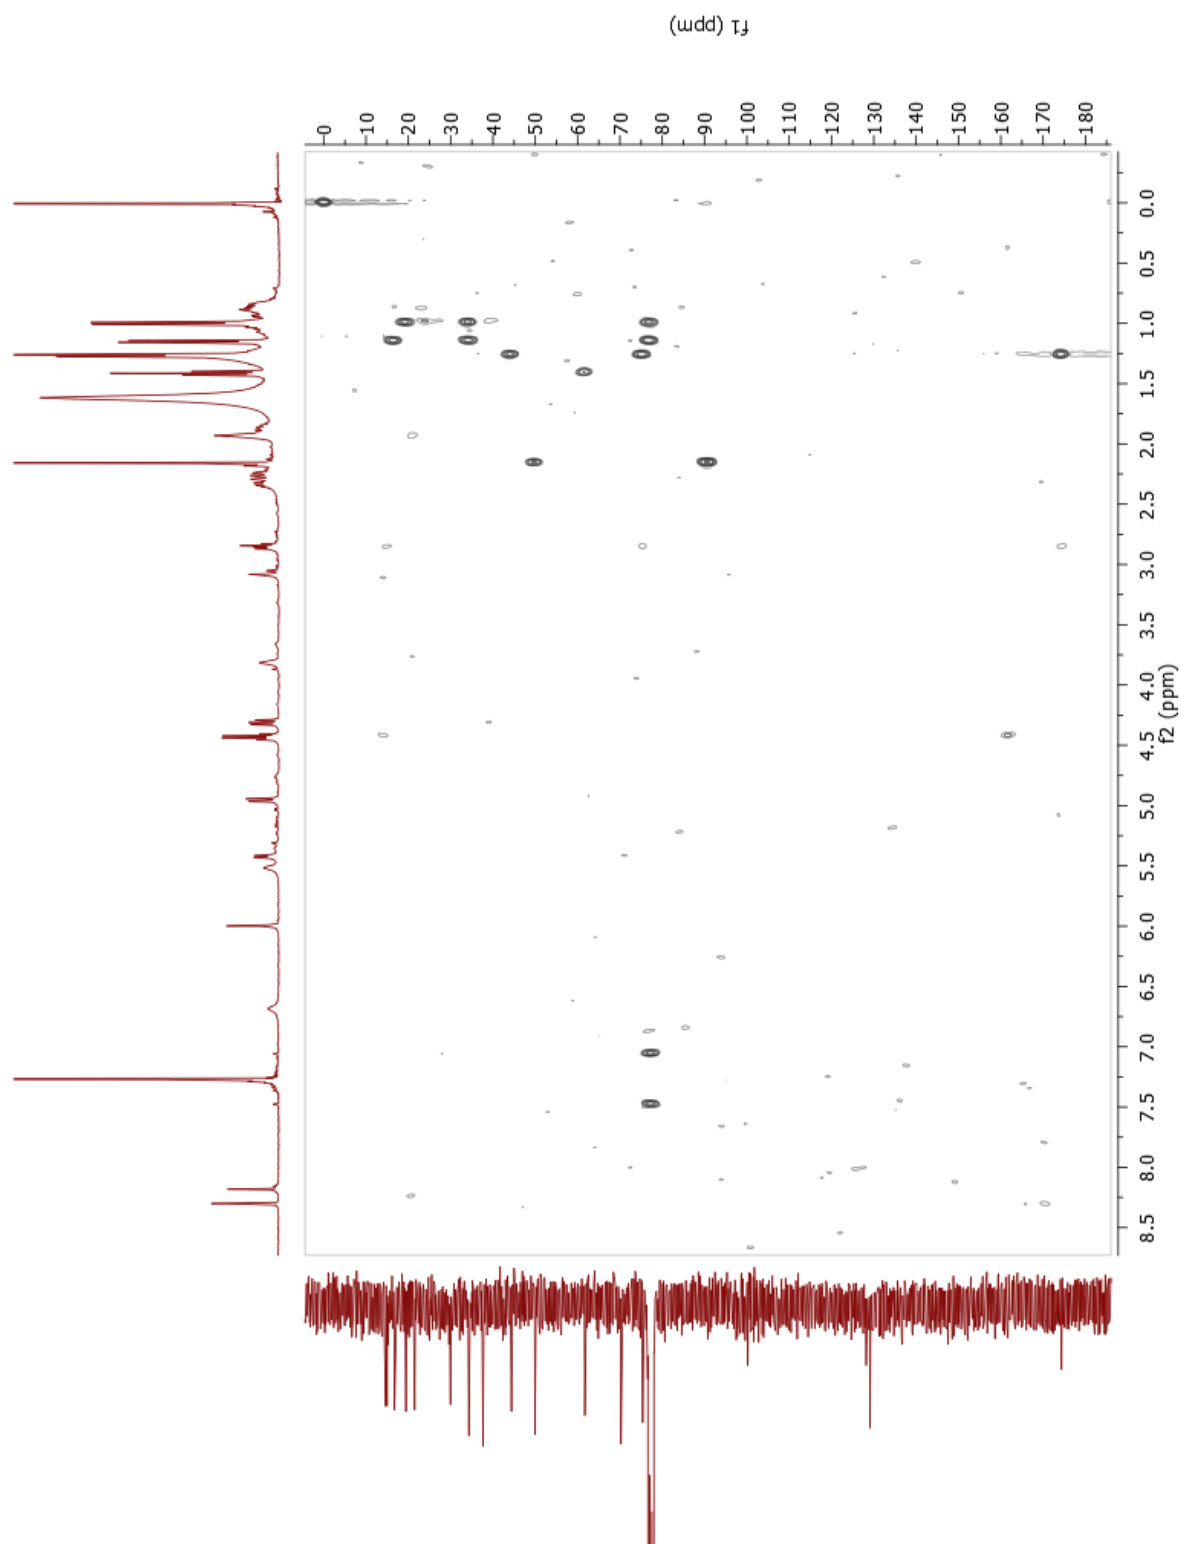

Figure S31.  $^1\text{H}$  NMR spectrum of 3,14-di-*S*-MTPA ester of lyngbyabellin M (**6**) (recorded in  $\text{CDCl}_3$  at 600 MHz).

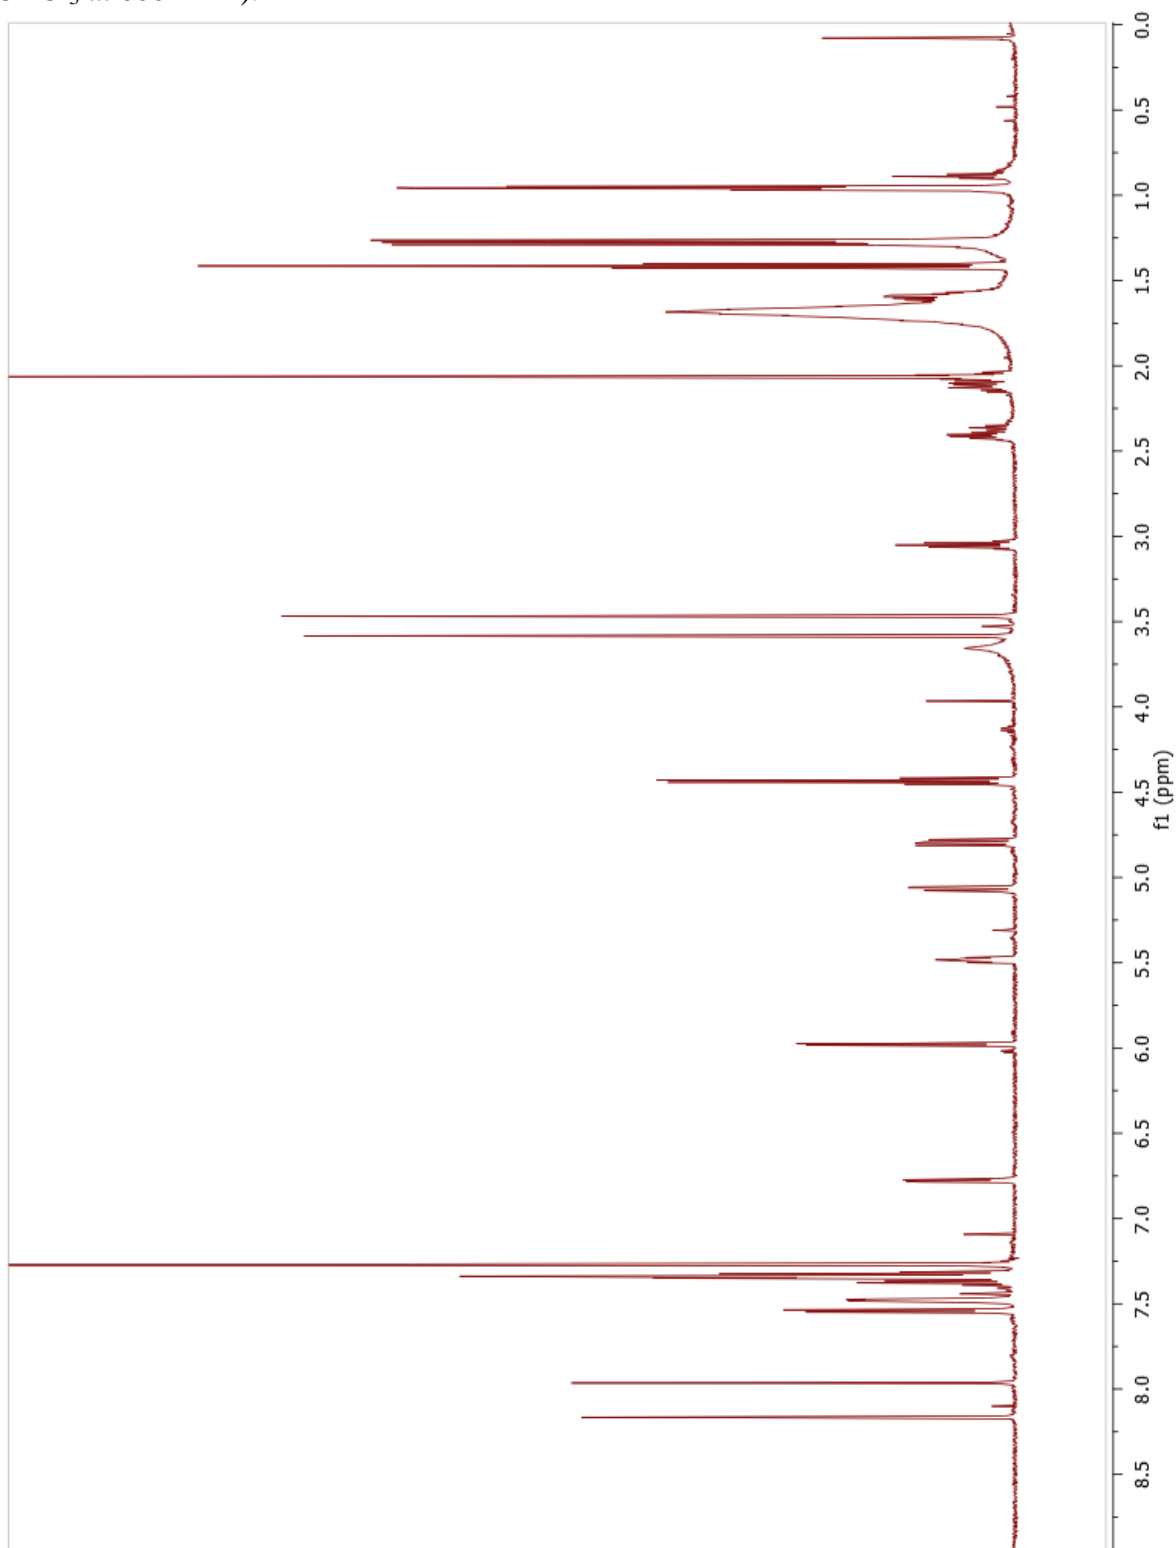

Figure S32.  $^1\text{H}$  NMR spectrum of 3,14-di-*R*-MTPA ester of lyngbyabellin M (**7**) (recorded in  $\text{CDCl}_3$  at 600 MHz).

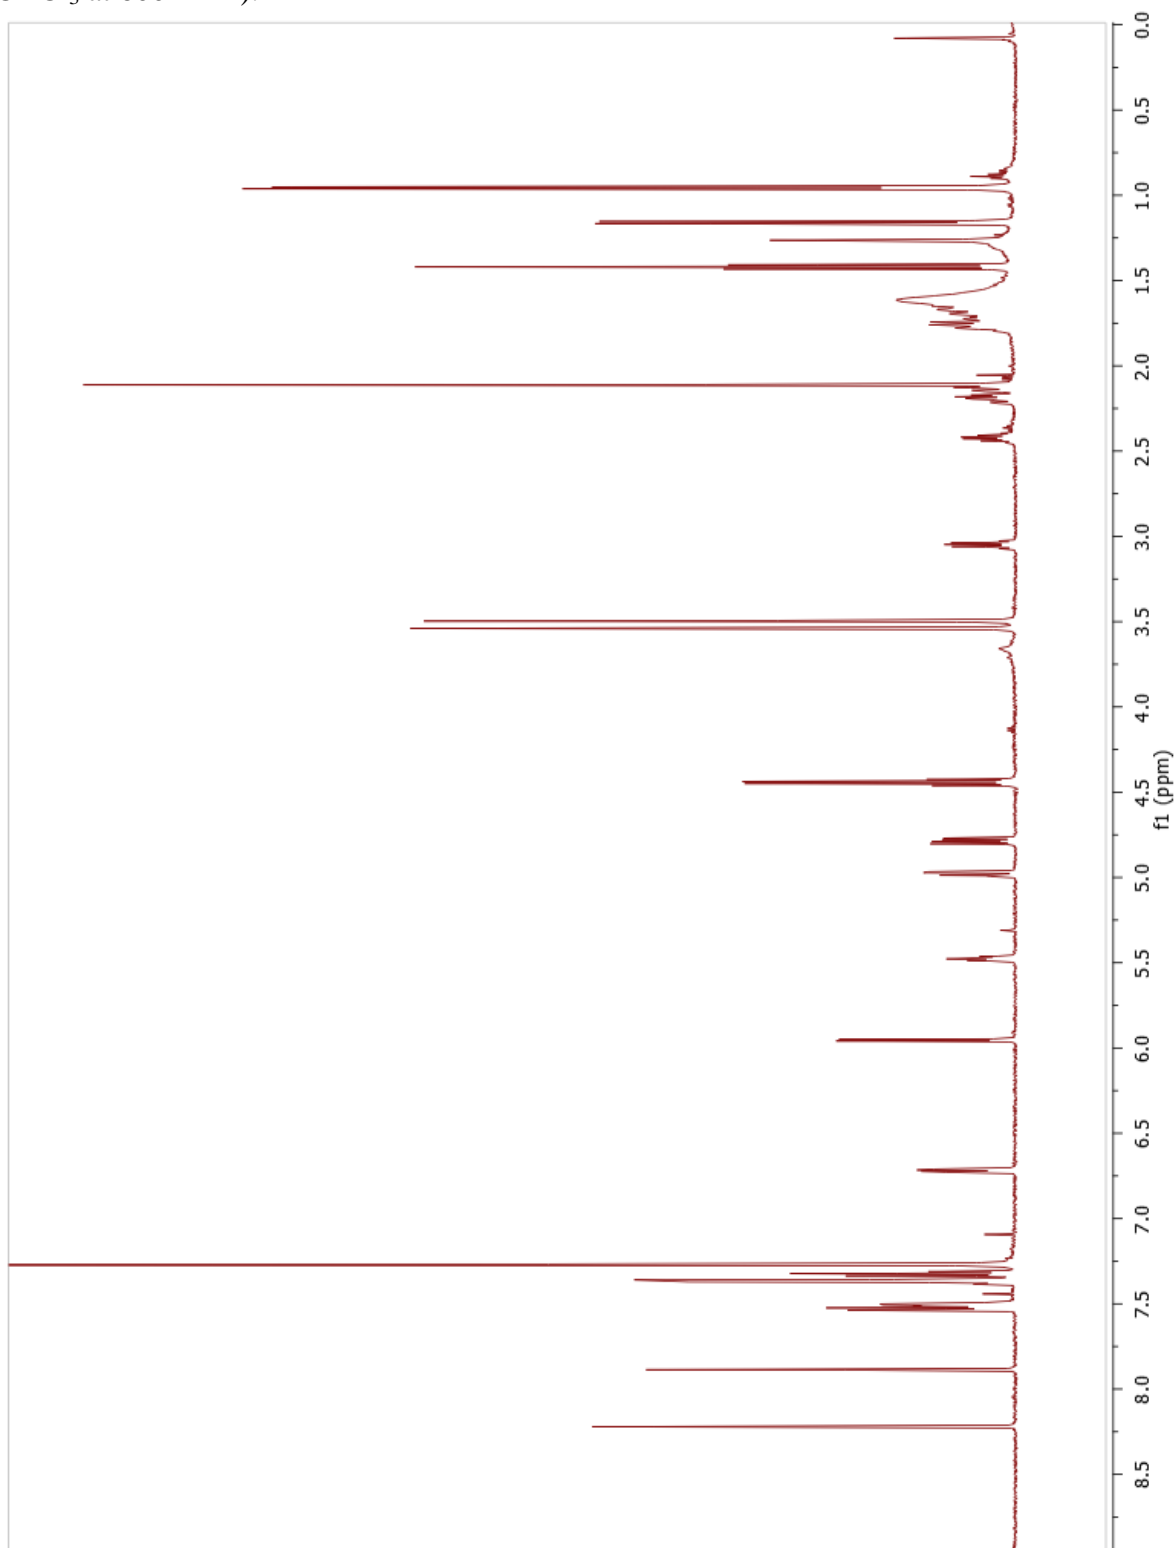

Figure S33. HR ESITOFMS of lyngbyabellin N (5).

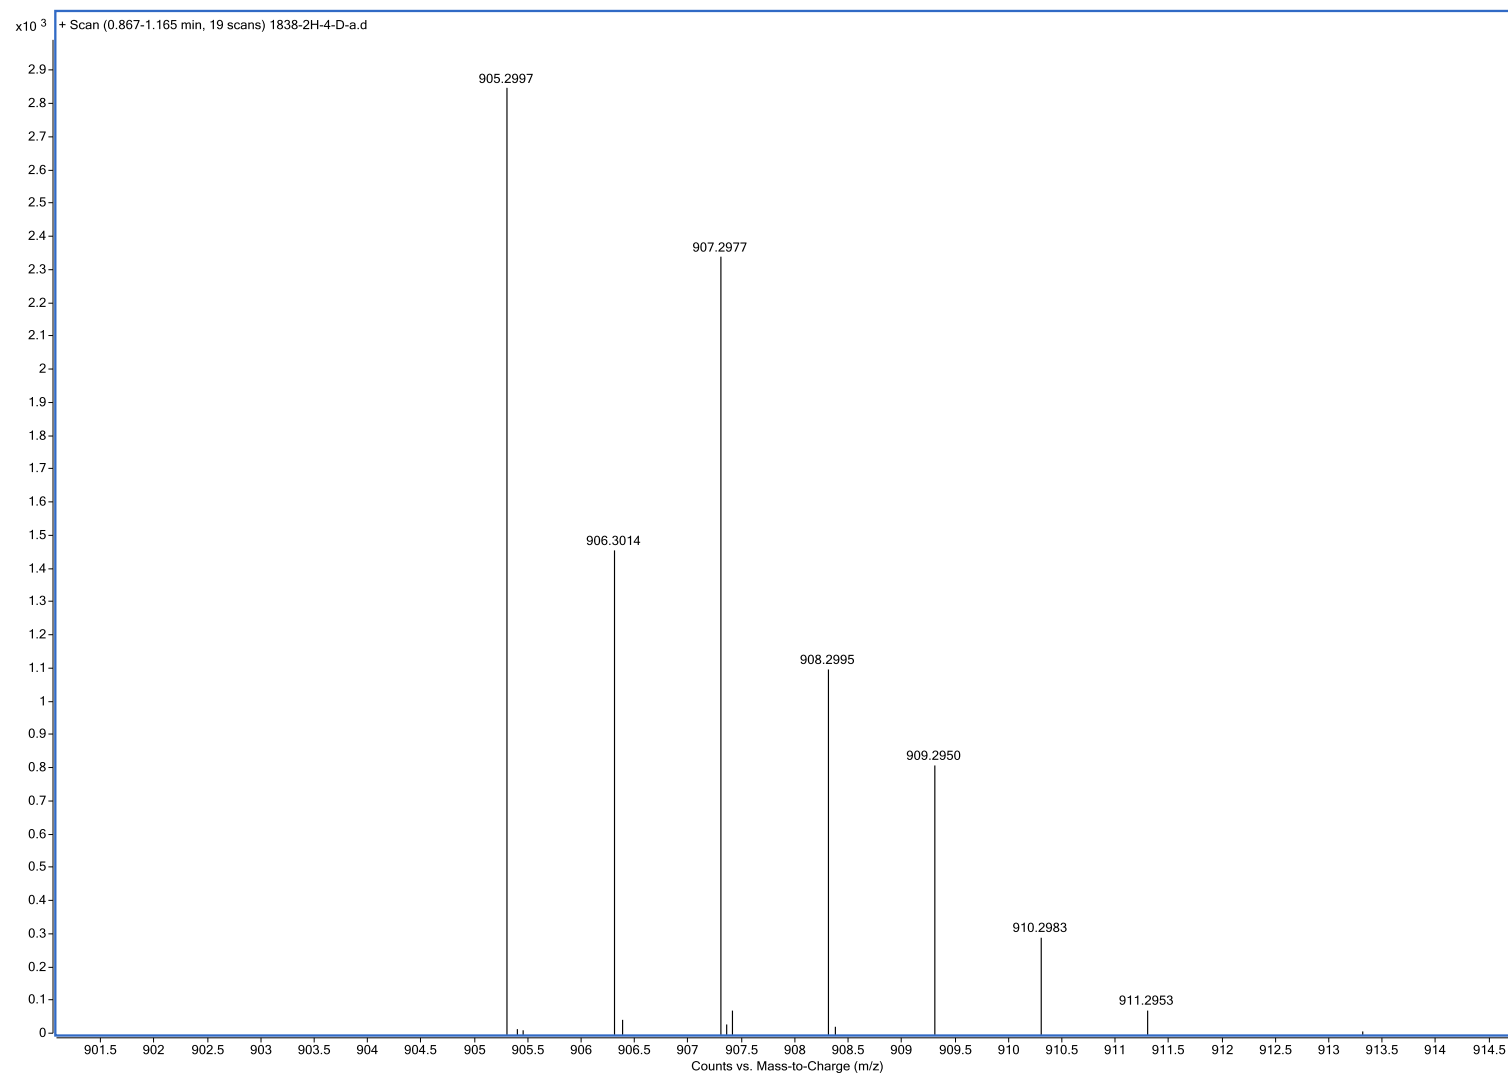

Figure S34.  $^1\text{H}$  NMR spectrum of lyngbyabellin N (**5**) (recorded in  $d_6$ -DMSO at 500 MHz)

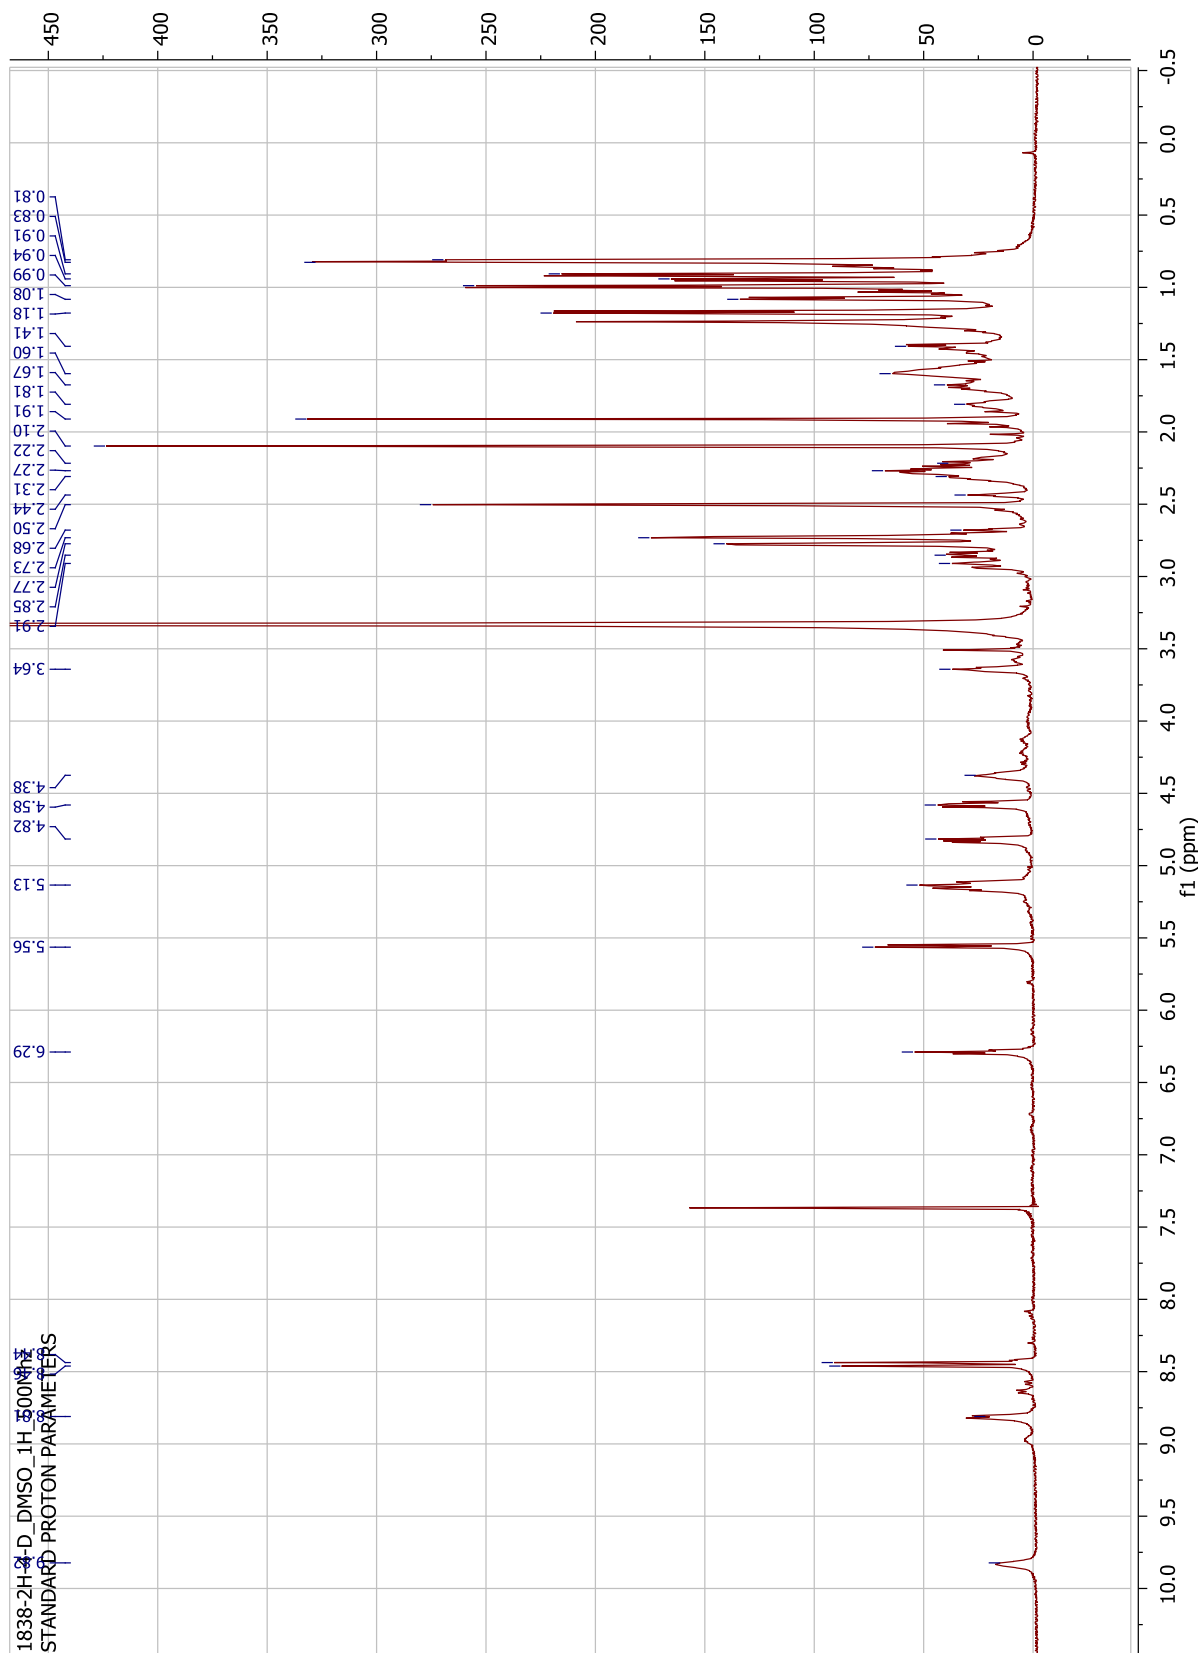

Figure S35.  $^{13}\text{C}$  NMR spectrum of lyngbyabellin N (**5**) (recorded in  $d_6$ -DMSO at 75 MHz)

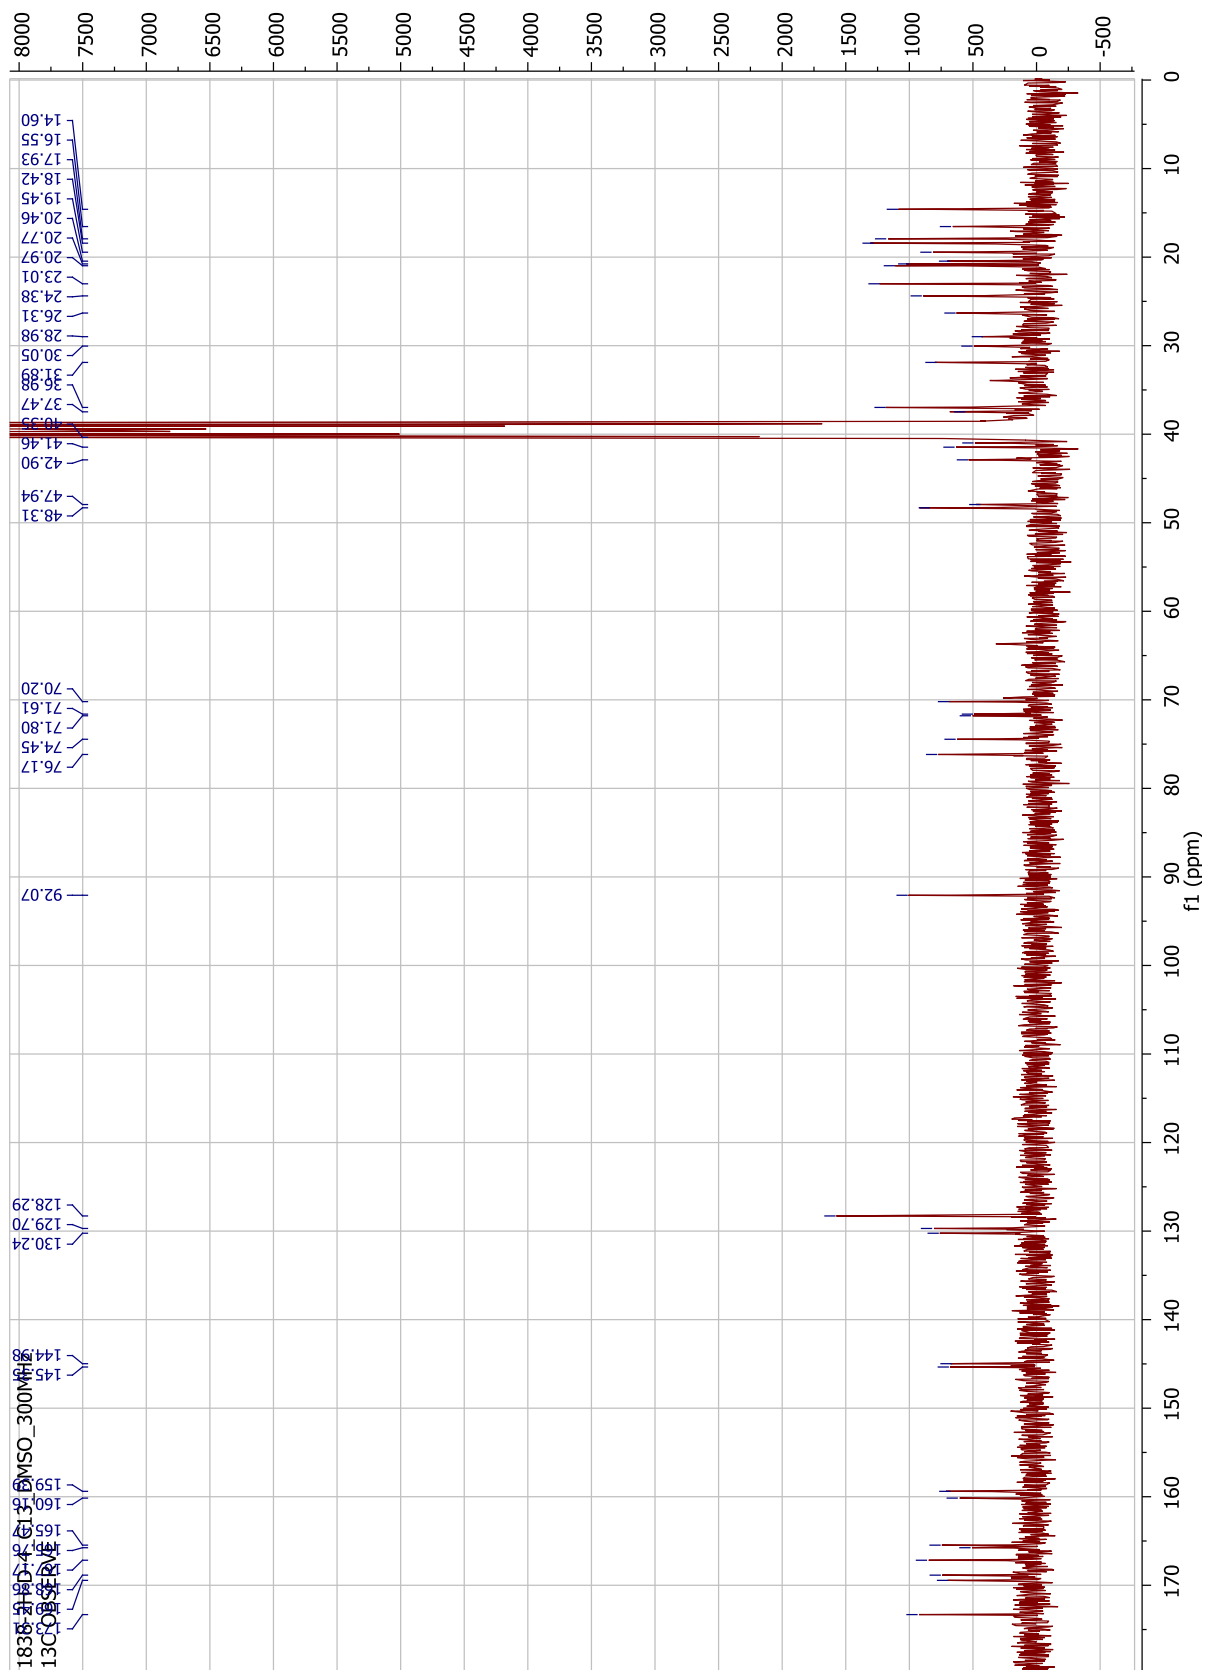

Figure S36. gHSQC spectrum of lyngbyabellin N (**5**) (recorded in  $d_6$ -DMSO at 500 MHz)

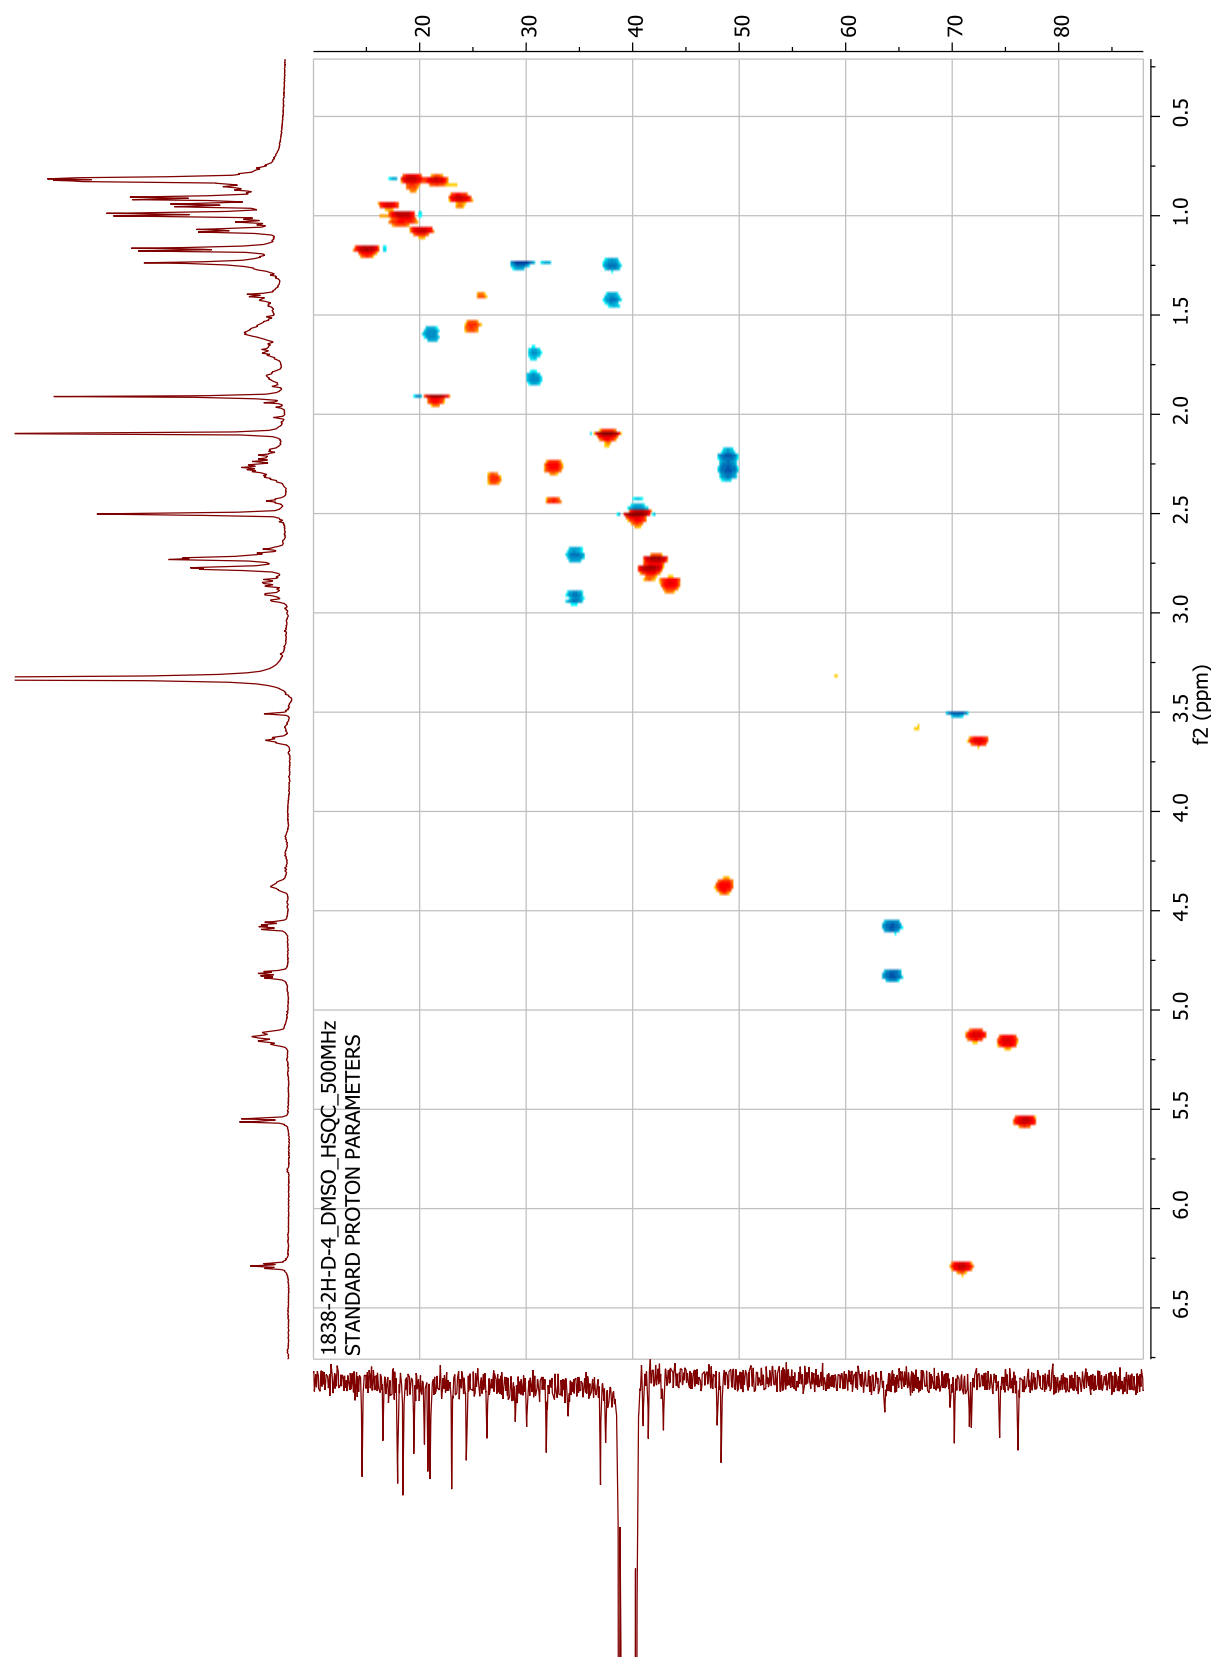

Figure S37. gCOSY spectrum of lyngbyabellin N (**5**) (recorded in  $d_6$ -DMSO at 500 MHz)

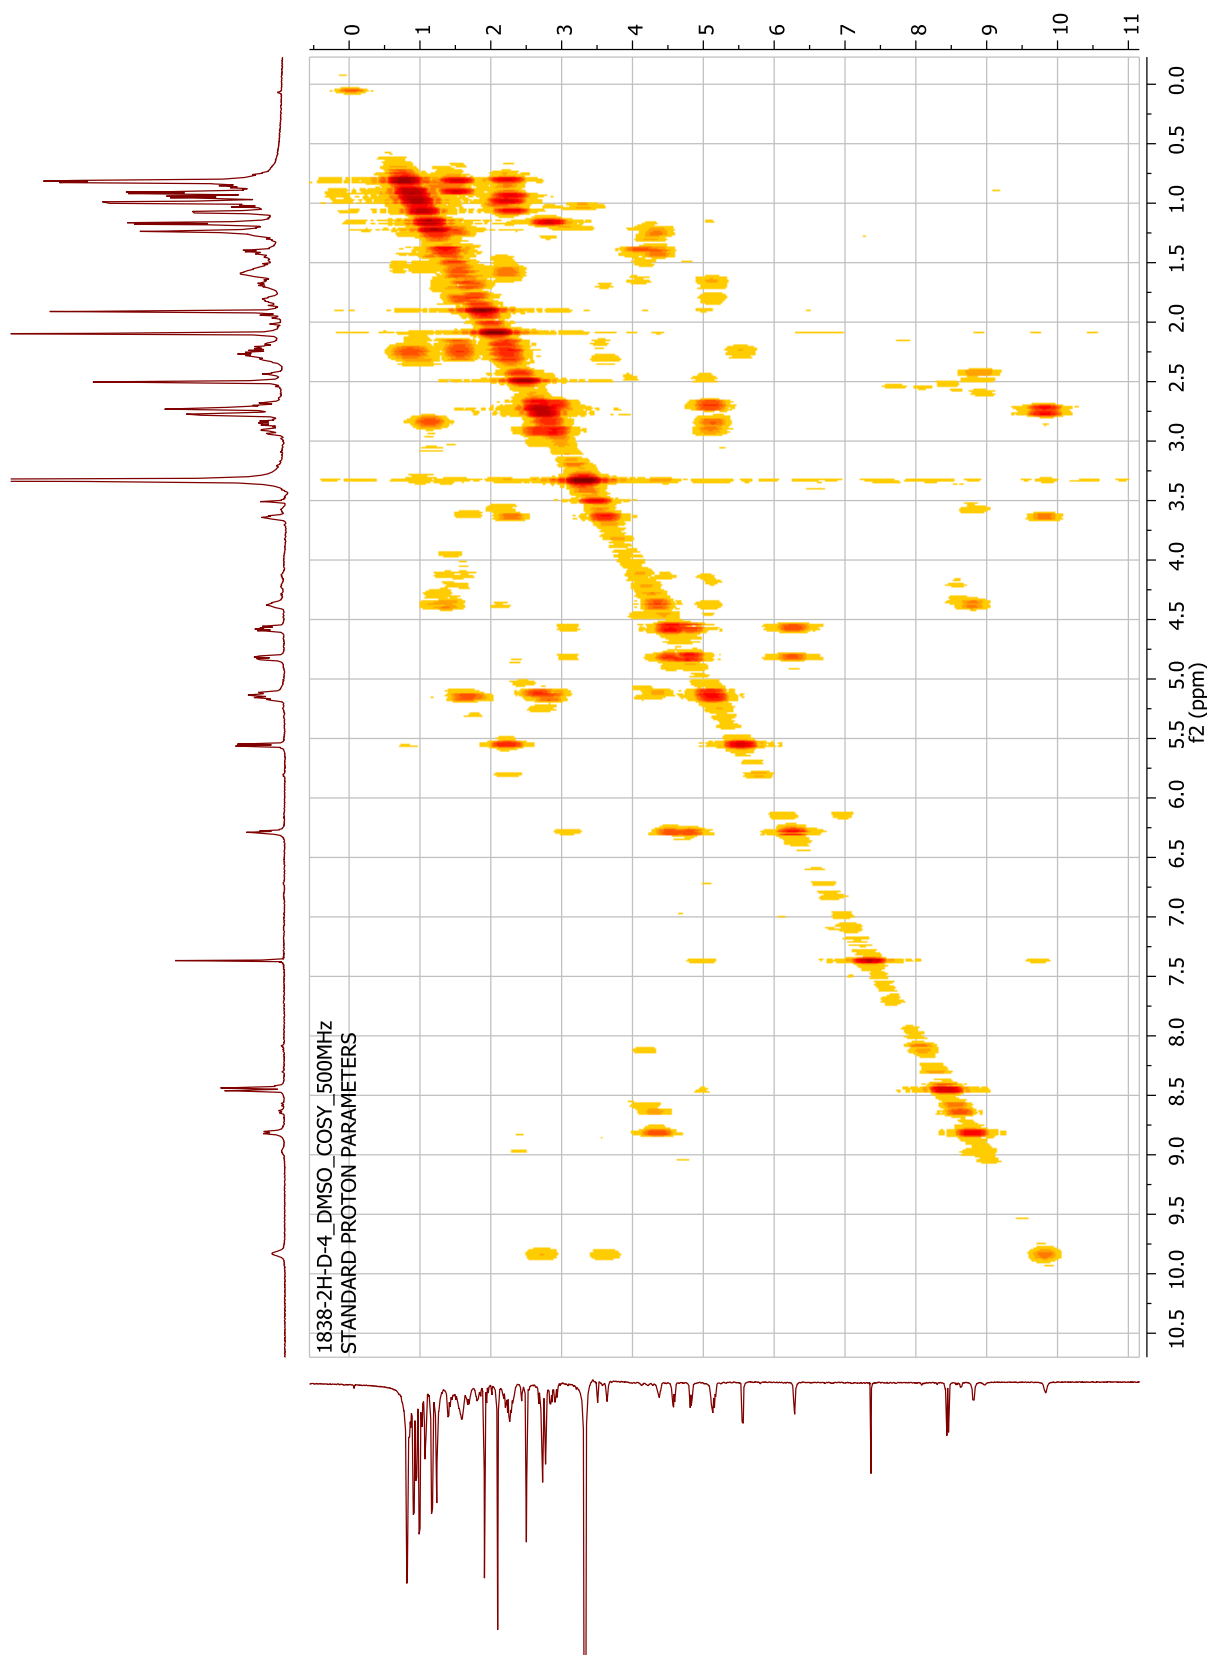



Figure S38. gHMBC spectrum of lyngbyabellin N (**5**) (recorded in  $d_6$ -DMSO at 500 MHz)

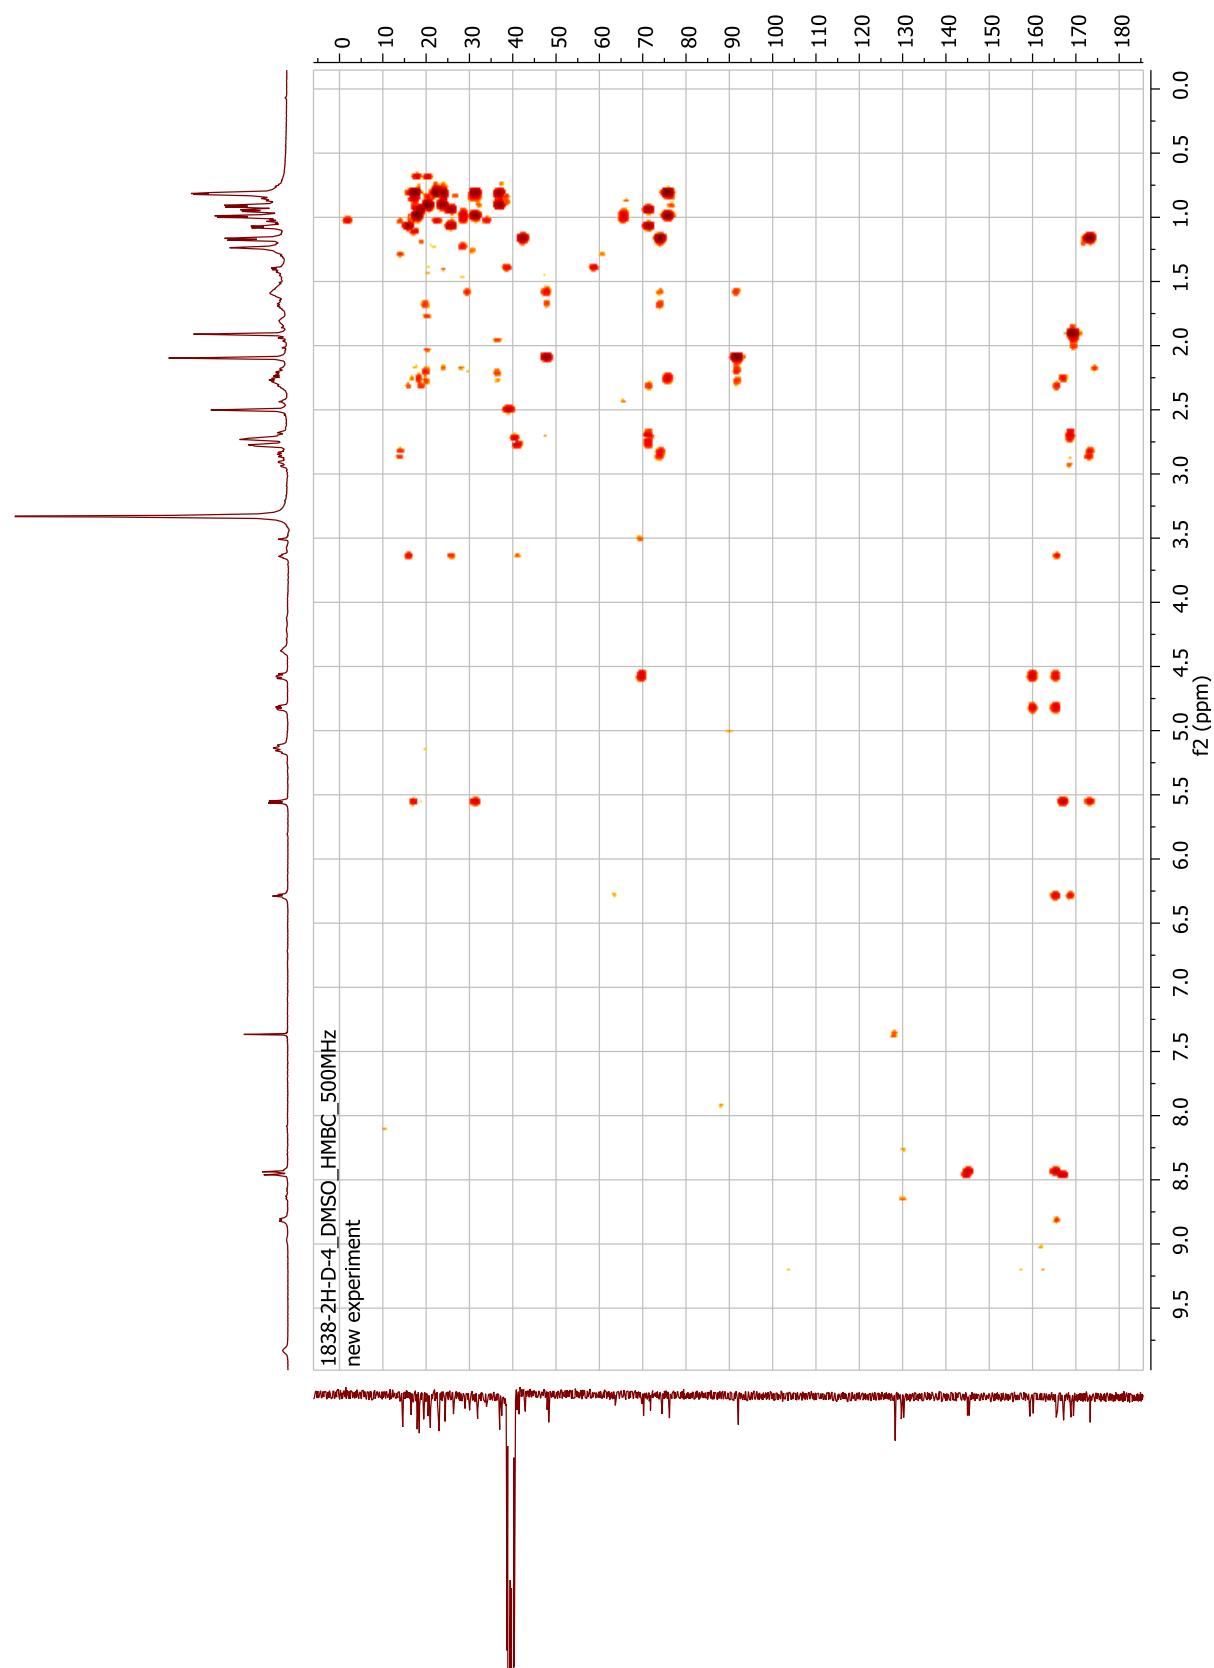

Figure S39. TOCSY spectrum of lyngbyabellin N (**5**) (recorded in  $d_6$ -DMSO at 500 MHz)

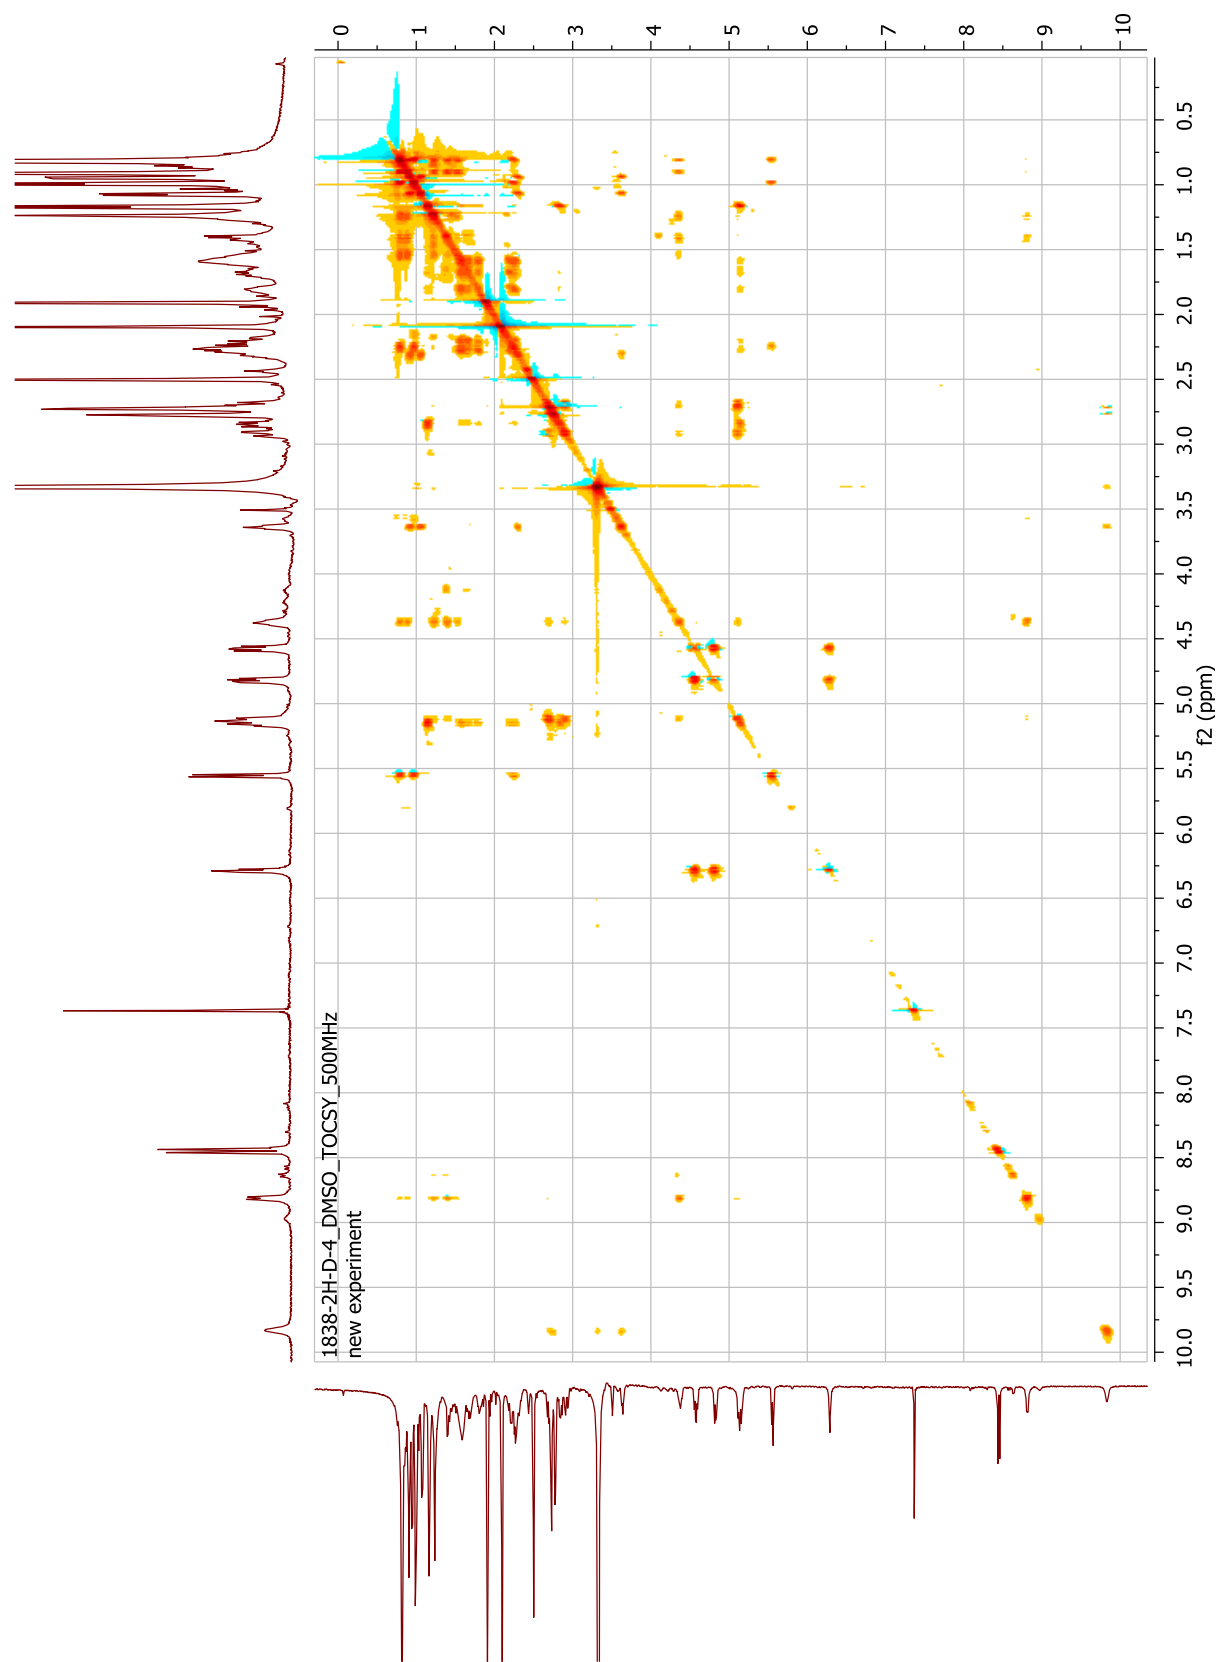

Figure S40. <sup>1</sup>H NMR spectrum of lyngbyabellin N (**5**) (recorded in CDCl<sub>3</sub> at 500 MHz)

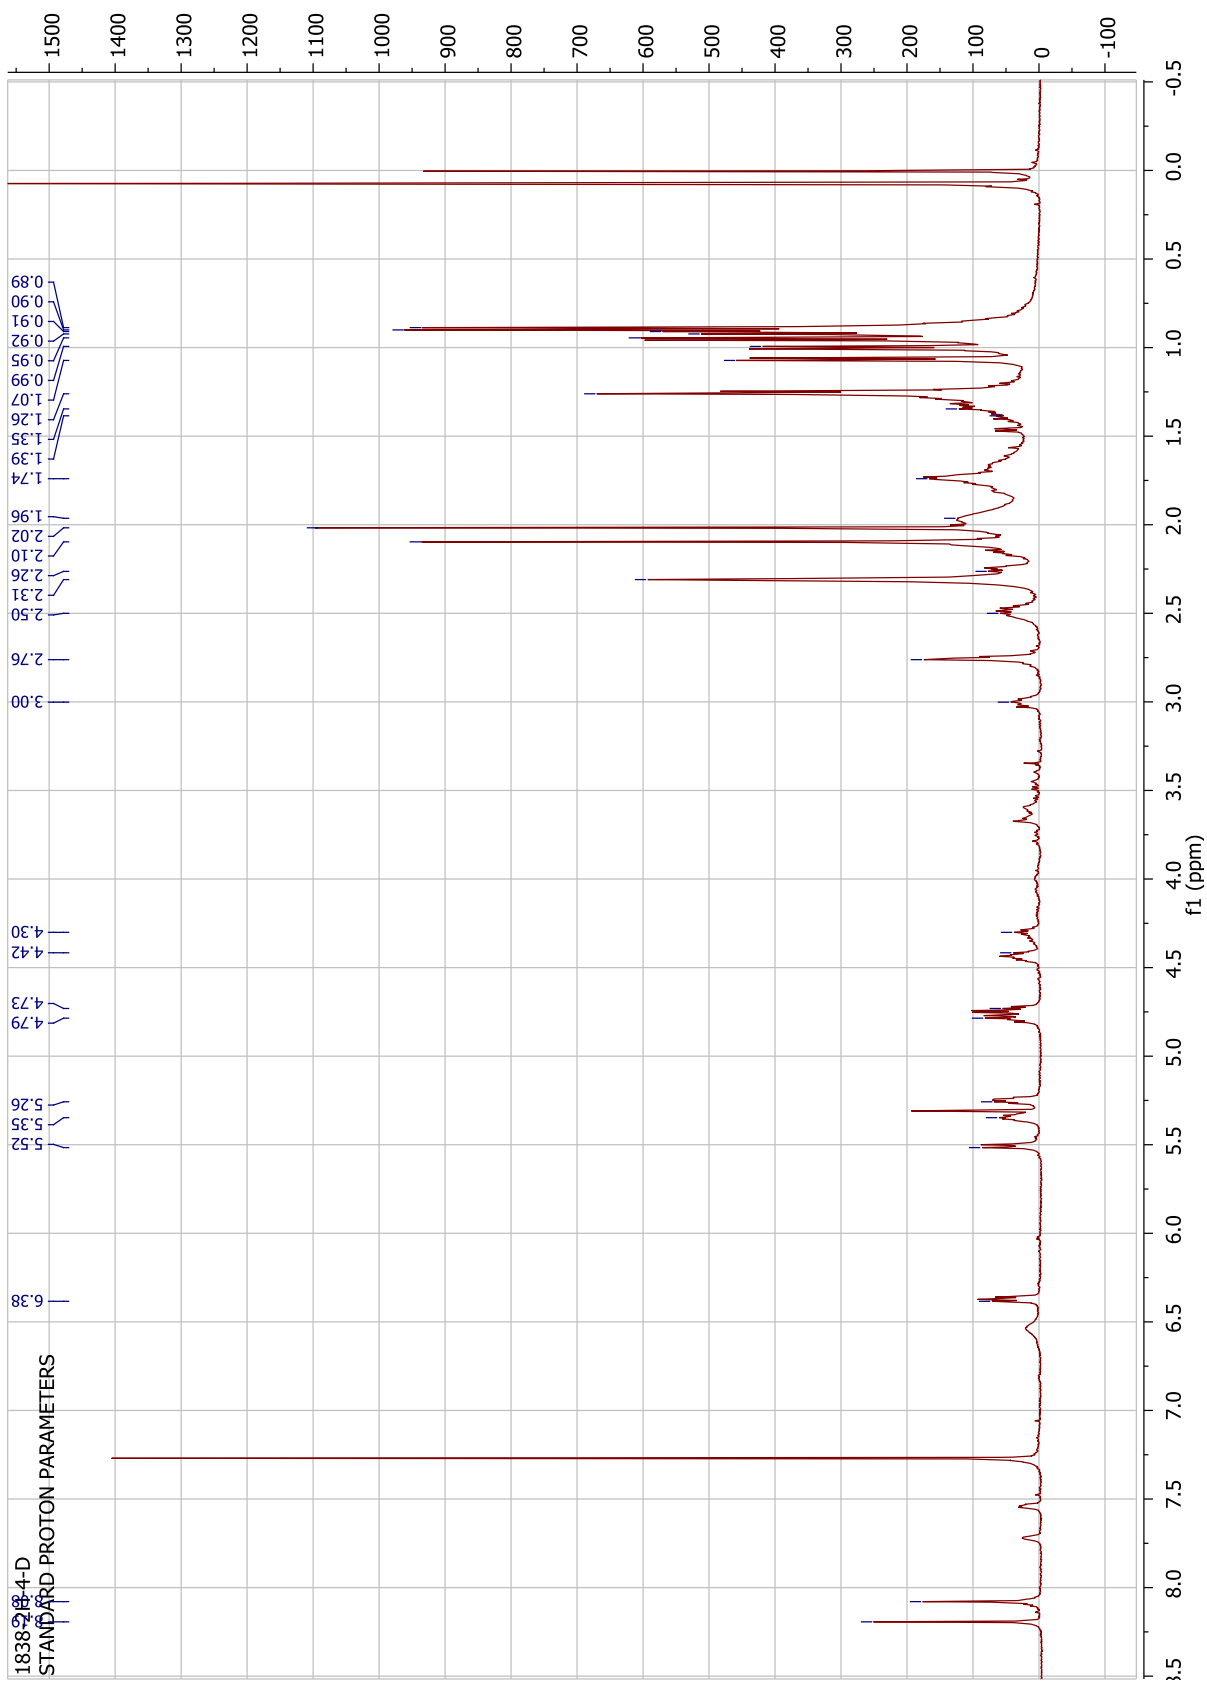

Figure S41.  $^{13}\text{C}$  NMR spectrum of lyngbyabellin N (**5**) (recorded in  $\text{CDCl}_3$  at 75 MHz)

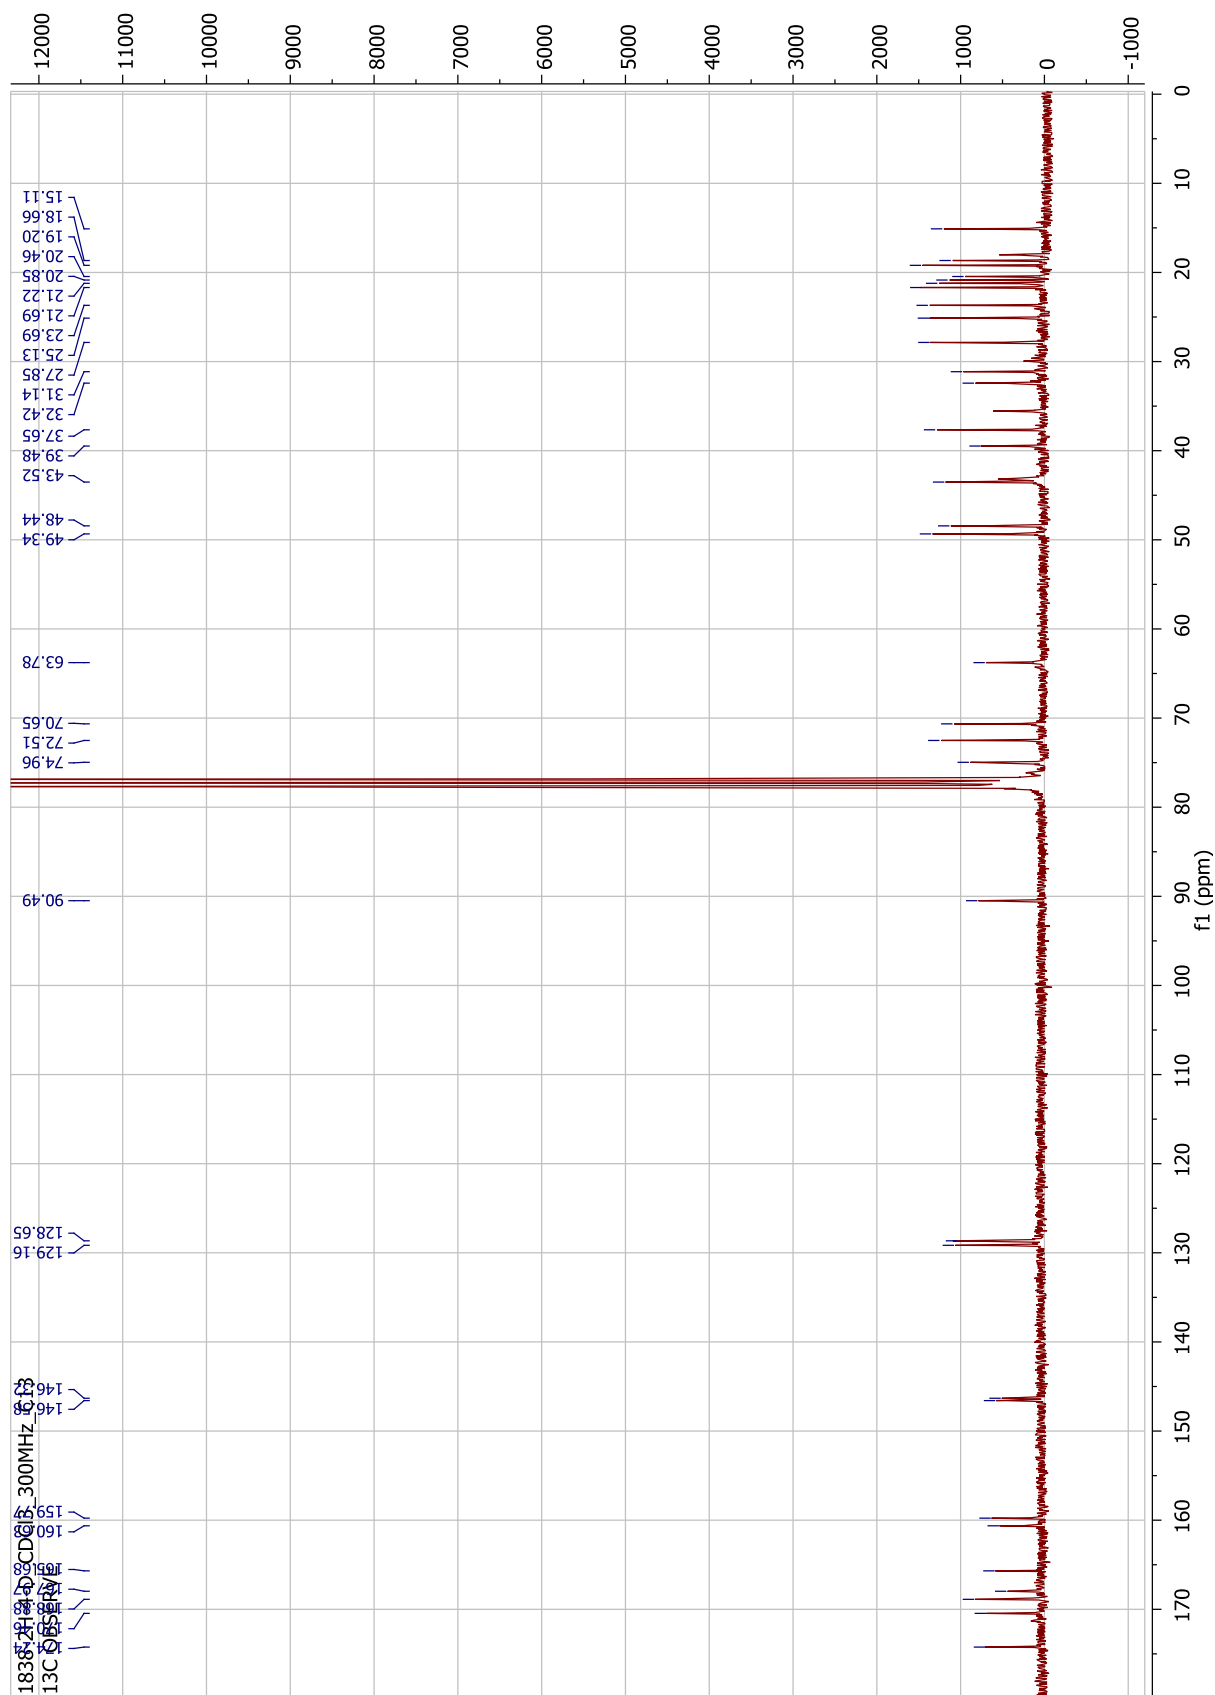

Supplement: NIHMS524498-supplement-Supporting_Information.pdf [file NIHMS524498-supplement-Supporting_Information.pdf]
